# Supplementary material for: Rhodium(iii)-catalyzed intermolecular [3+3] annulation of benzoxazines with quinone compounds: access to spiro-heterocyclic scaffolds
Source: Royal Society of Chemistry journal article supplement (doi:10.1039/d3cc03609j), 2023-01-01
Supplement: d3cc03609j1.pdf [file d3cc03609j1.pdf]

# Supporting Information

## Rhodium(III)-Catalyzed Intermolecular [3+3] Annulation of Benzoxazines with Quinone Compounds: Access to Spiro- Heterocyclic Scaffolds

Qing-Yi Wei,<sup>‡a</sup> Ze Zhou,<sup>‡a</sup> Meng-Lian Yao,<sup>‡a</sup> Ji-Kai Liu,<sup>a</sup> Bin Wu<sup>a</sup> and  
Jin-Ming Yang<sup>\*a,b</sup>

<sup>a</sup>School of Pharmaceutical Sciences, South-Central Minzu University, Wuhan 430074,  
People's Republic of China. E-mail: [jmyang@scuec.edu.cn](mailto:jmyang@scuec.edu.cn).

<sup>b</sup>College of Materials and Chemical Engineering, Key Laboratory of Inorganic  
Nonmetallic Crystalline and Energy Conversion Materials, China Three Gorges  
University, Yichang 443002, People's Republic of China.

<sup>‡</sup>Q.-Y. Wei, Z. Zhou and M.-L. Yao contributed equally to this work.

## CONTENTS

|                                                                                                        |      |
|--------------------------------------------------------------------------------------------------------|------|
| (A) General Remarks.....                                                                               | S1   |
| (B) Screening of reaction conditions for <b>3a</b> .....                                               | S2   |
| (C) General procedure for the Synthesis of Substrates <b>1</b> and <b>2</b> .....                      | S6   |
| (D) General Procedure for Intermolecular Annulation and Analytical Data of Products <b>3a-3z</b> ..... | S29  |
| (E) Derivatization of the Products.....                                                                | S77  |
| (F) Gram Scale Experiments.....                                                                        | S100 |
| (G) Mechanistic Experiments.....                                                                       | S100 |
| (H) X-ray Crystal Data of Compound <b>3i</b> .....                                                     | S106 |
| (I) X-ray Crystal Data of Compound <b>13</b> .....                                                     | S108 |
| (J) References.....                                                                                    | S110 |

## **(A) General Remarks.**

Unless otherwise stated, all reactions were performed in sealed tube (capacity 15 mL). Commercially available reagents were used without further purification. NMR spectra were recorded on Bruker Avance NEO 500 or Bruker Avance III 600 instruments and calibrated using residual solvent peaks as internal reference. Chemical shifts ( $\delta$ ) were expressed in ppm with reference to the solvent signals. Coupling constants  $J$  are given in Hz. High-resolution mass spectra (HRMS) were obtained using electrospray ionization (ESI) [quantitative time-of-flight (Q-TOF)] ionization sources on an Agilent 6200 Q-TOF MS. Infrared (IR) spectra were obtained with a Tenor 27 spectrophotometer using KBr pellets. Melting points were determined on a SGW X-4A melting point apparatus. Fluorescence spectra were recorded on an F-4600 fluorospectro photometer (HITACHI Company). UV-visible absorption spectra were acquired with a Lambda-35 UV-visible Spectrophotometer (PerkinElmer Company). X-ray diffraction was obtained by Bruker D8 QUEST. TLC analyses were performed on commercial glass plates bearing 0.25-mm layer of Merck Silica gel GF254. Silica gel (Huanghai 300 - 400 mesh) was used for flash column chromatography.

## (B) Screening of reaction conditions for 3a.

Table S1. Optimization of Reaction Conditions.

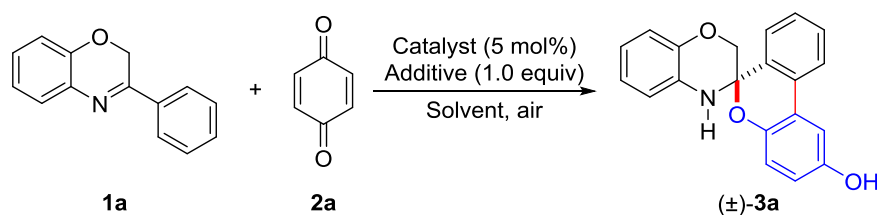

| Entry <sup>a</sup> | Catalyst                                                                  | Additive                       | Solvent | Temp. (°C) | Time (h) | Yield(%) <sup>b</sup> |
|--------------------|---------------------------------------------------------------------------|--------------------------------|---------|------------|----------|-----------------------|
| 1                  | [Cp*RhCl <sub>2</sub> ] <sub>2</sub>                                      | NaOAc                          | TFE     | rt         | 4        | 28                    |
| 2                  | [Cp*RhCl <sub>2</sub> ] <sub>2</sub>                                      | CsOAc                          | TFE     | rt         | 10       | 22                    |
| 3                  | [Cp*RhCl <sub>2</sub> ] <sub>2</sub>                                      | K <sub>3</sub> PO <sub>4</sub> | TFE     | rt         | 10       | ND                    |
| 4                  | [Cp*RhCl <sub>2</sub> ] <sub>2</sub>                                      | KHCO <sub>3</sub>              | TFE     | rt         | 10       | trace                 |
| 5                  | [Cp*RhCl <sub>2</sub> ] <sub>2</sub>                                      | Zn(OAc) <sub>2</sub>           | TFE     | rt         | 10       | 76                    |
| 6                  | [Cp*RhCl <sub>2</sub> ] <sub>2</sub>                                      | Zn(OAc) <sub>2</sub>           | MeOH    | rt         | 10       | 22                    |
| 7                  | [Cp*RhCl <sub>2</sub> ] <sub>2</sub>                                      | Zn(OAc) <sub>2</sub>           | HFIP    | rt         | 10       | 13                    |
| 8                  | [Cp*RhCl <sub>2</sub> ] <sub>2</sub>                                      | Zn(OAc) <sub>2</sub>           | DCM     | rt         | 10       | ND                    |
| 9                  | [Cp*RhCl <sub>2</sub> ] <sub>2</sub>                                      | Zn(OAc) <sub>2</sub>           | THF     | rt         | 10       | ND                    |
| 10                 | [Cp*RhCl <sub>2</sub> ] <sub>2</sub>                                      | Zn(OAc) <sub>2</sub>           | MeCN    | rt         | 12       | trace                 |
| 11                 | [Cp*RhCl <sub>2</sub> ] <sub>2</sub>                                      | Zn(OAc) <sub>2</sub>           | PhCl    | rt         | 12       | NR                    |
| 12                 | [Cp*RhCl <sub>2</sub> ] <sub>2</sub>                                      | Zn(OAc) <sub>2</sub>           | toluene | rt         | 12       | NR                    |
| 13                 | [Cp*RhCl <sub>2</sub> ] <sub>2</sub>                                      | Zn(OAc) <sub>2</sub>           | CPME    | rt         | 12       | NR                    |
| 14                 | [Cp*RhCl <sub>2</sub> ] <sub>2</sub>                                      | Zn(OAc) <sub>2</sub>           | acetone | rt         | 48       | 92                    |
| 15                 | [Cp*RhCl <sub>2</sub> ] <sub>2</sub>                                      | Zn(OAc) <sub>2</sub>           | acetone | 50         | 24       | 94                    |
| 16 <sup>c</sup>    | [Cp*RhCl <sub>2</sub> ] <sub>2</sub>                                      | Zn(OAc) <sub>2</sub>           | acetone | 50         | 24       | 94                    |
| 17 <sup>d</sup>    | [Cp*RhCl <sub>2</sub> ] <sub>2</sub>                                      | Zn(OAc) <sub>2</sub>           | acetone | 50         | 24       | 95                    |
| 18 <sup>d,e</sup>  | [Cp*RhCl <sub>2</sub> ] <sub>2</sub>                                      | Zn(OAc) <sub>2</sub>           | acetone | 50         | 24       | 79                    |
| 19 <sup>d,f</sup>  | [Cp*RhCl <sub>2</sub> ] <sub>2</sub>                                      | Zn(OAc) <sub>2</sub>           | acetone | 50         | 24       | 81                    |
| 20 <sup>d,g</sup>  | [Cp*RhCl <sub>2</sub> ] <sub>2</sub>                                      | Zn(OAc) <sub>2</sub>           | acetone | 50         | 24       | 88                    |
| 21 <sup>d,h</sup>  | [Cp*RhCl <sub>2</sub> ] <sub>2</sub>                                      | Zn(OAc) <sub>2</sub>           | acetone | 50         | 24       | 50                    |
| 22 <sup>d,i</sup>  | [Cp*RhCl <sub>2</sub> ] <sub>2</sub>                                      | Zn(OAc) <sub>2</sub>           | acetone | 50         | 24       | 68                    |
| 23 <sup>d</sup>    | [Cp*RhCl <sub>2</sub> ] <sub>2</sub>                                      | -                              | acetone | 50         | 24       | ND                    |
| 24                 | -                                                                         | Zn(OAc) <sub>2</sub>           | acetone | 50         | 24       | ND                    |
| 25 <sup>d,j</sup>  | [Cp*IrCl <sub>2</sub> ] <sub>2</sub>                                      | Zn(OAc) <sub>2</sub>           | acetone | 50         | 24       | NR                    |
| 26 <sup>d,j</sup>  | [Ru( <i>p</i> -Cymene)Cl <sub>2</sub> ] <sub>2</sub>                      | Zn(OAc) <sub>2</sub>           | acetone | 50         | 24       | NR                    |
| 27 <sup>d,j</sup>  | [Cp*Rh(CH <sub>3</sub> CN) <sub>3</sub> ][SbF <sub>6</sub> ] <sub>2</sub> | Zn(OAc) <sub>2</sub>           | acetone | 50         | 24       | 45                    |

<sup>a</sup>Reaction conditions: **1a** (0.1 mmol), **2a** (2.0 equiv), Catalyst (5 mol%), Solvent (0.1 M) under air. <sup>b</sup>Isolated Yields. <sup>c</sup>Catalyst (2.5 mol%). <sup>d</sup>Catalyst (1 mol%). <sup>e</sup>**2a** (1.0 equiv). <sup>f</sup>**2a** (1.2 equiv). <sup>g</sup>**2a** (1.5 equiv). <sup>h</sup>Additive (0.2 equiv). <sup>i</sup>Additive (0.5 equiv). <sup>j</sup>**1a** (0.2 mmol). ND = Not Detected. NR = No Reaction.



**Table S2. Optimization of the Additives.**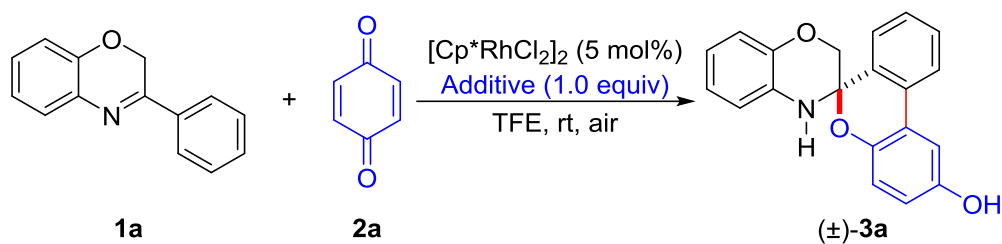

| Entry <sup>a</sup> | Additive                       | T (h) | Yield(%) <sup>b</sup> |
|--------------------|--------------------------------|-------|-----------------------|
| 1                  | NaOAc                          | 4     | 28                    |
| 2                  | CsOAc                          | 10    | 22                    |
| 3                  | K <sub>3</sub> PO <sub>4</sub> | 10    | ND                    |
| 4                  | KHCO <sub>3</sub>              | 10    | trace                 |
| 5                  | Zn(OAc) <sub>2</sub>           | 10    | <b>76</b>             |

<sup>a</sup>Reaction conditions: 0.1 mmol of **1a**, 0.2 mmol of **2a**, 5 mol% of [Cp\*RhCl<sub>2</sub>]<sub>2</sub>, 0.1 mmol of Additive, 1.0 mL of TFE, room temperature under air. <sup>b</sup>Isolated yield refers to **1a**.

**Table S3. Optimization of the Solvents.**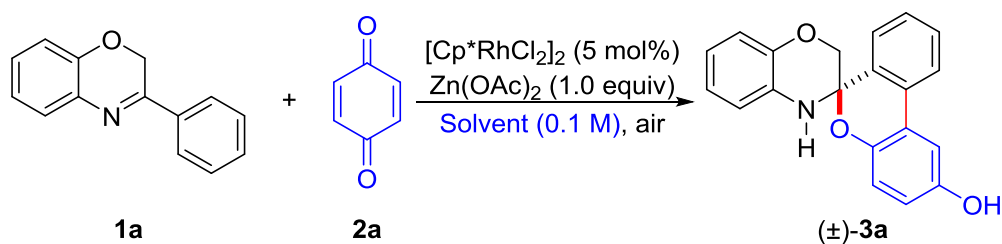

| Entry <sup>a</sup> | Solvent | Temperature (°C) | Time (h) | Yield(%) <sup>b</sup> |
|--------------------|---------|------------------|----------|-----------------------|
| 1                  | TFE     | rt               | 10       | 76                    |
| 2                  | MeOH    | rt               | 10       | 22                    |
| 3                  | HFIP    | rt               | 10       | 13                    |
| 4                  | DCM     | rt               | 10       | ND                    |
| 5                  | THF     | rt               | 10       | ND                    |
| 6                  | MeCN    | rt               | 12       | trace                 |
| 7                  | PhCl    | rt               | 12       | NR                    |
| 8                  | toluene | rt               | 12       | NR                    |
| 9                  | CPME    | rt               | 12       | NR                    |
| 10                 | acetone | rt               | 48       | <b>92</b>             |

<sup>a</sup>Reaction conditions: 0.1 mmol of **1a**, 0.2 mmol of **2a**, 5 mol% of [Cp\*RhCl<sub>2</sub>]<sub>2</sub>, 0.1 mmol of Zn(OAc)<sub>2</sub>, 1.0 mL of Solvent, room temperature under air. <sup>b</sup>Isolated yield refers to **1a**.

**Table S4. Optimization of Reaction Temperature.**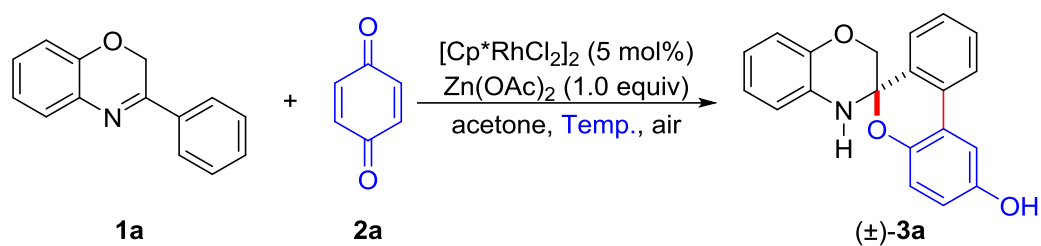

| Entry <sup>a</sup> | Temp. (°C) | Time (h) | Yield(%) <sup>b</sup> |
|--------------------|------------|----------|-----------------------|
| 1                  | rt         | 48       | 92                    |
| 2                  | 50         | 24       | 94                    |

<sup>a</sup>Reaction conditions: 0.1 mmol of **1a**, 0.2 mmol of **2a**, 5 mol% of  $[\text{Cp}^*\text{RhCl}_2]_2$ , 0.1 mmol of  $\text{Zn}(\text{OAc})_2$ , 1.0 mL of acetone, under air. <sup>b</sup>Isolated yield refers to **1a**.

**Table S5. Optimization of the Catalyst Loading.**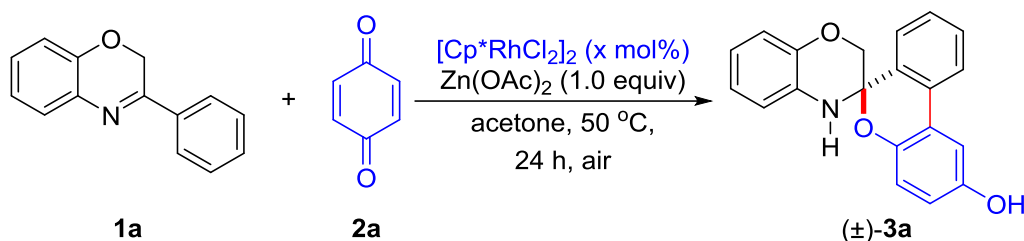

| Entry <sup>a</sup> | Catalyst (x mol%) | Yield(%) <sup>b</sup> |
|--------------------|-------------------|-----------------------|
| 1                  | 5                 | 94                    |
| 2                  | 2.5               | 94                    |
| 3                  | 1                 | 95                    |

<sup>a</sup>Reaction conditions: 0.1 mmol of **1a**, 0.2 mmol of **2a**, 0.1 mmol of  $\text{Zn}(\text{OAc})_2$ , 1.0 mL of acetone, under air. <sup>b</sup>Isolated yield refers to **1a**.

**Table S6. Optimization of the Equivalent of 2a.**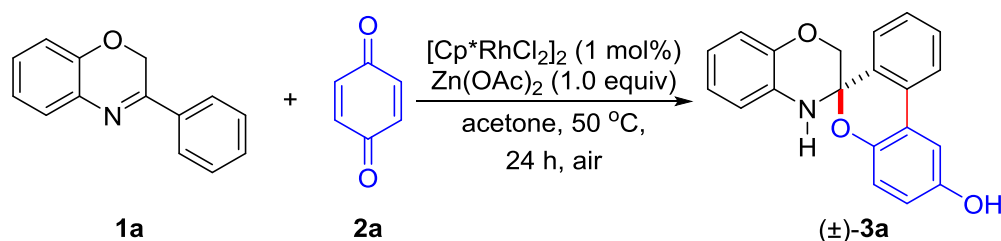

| Entry <sup>a</sup> | <b>2a</b> (x equiv) | Yield(%) <sup>b</sup> |
|--------------------|---------------------|-----------------------|
| 1                  | 2.0                 | 95                    |
| 2                  | 1.0                 | 79                    |
| 3                  | 1.2                 | 81                    |
| 4                  | 1.5                 | 88                    |

<sup>a</sup>Reaction conditions: 0.1 mmol of **1a**, 1 mol% of  $[\text{Cp}^*\text{RhCl}_2]_2$ , 0.1 mmol of  $\text{Zn}(\text{OAc})_2$ , 1.0 mL of acetone, under air. <sup>b</sup>Isolated yield refers to **1a**.

**Table S7. Optimization of the Equivalent of Additives.**

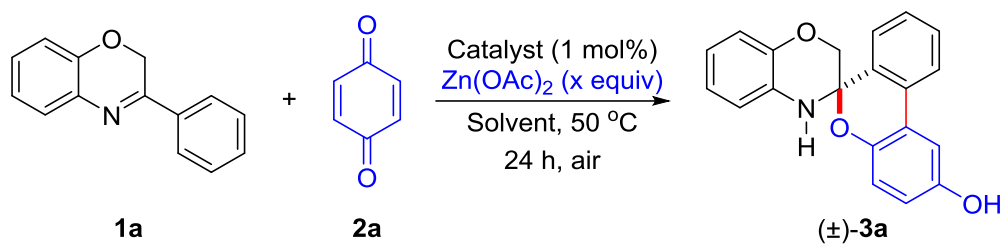

| Entry <sup>a</sup> | Additive (x equiv) | Yield(%) <sup>b</sup> |
|--------------------|--------------------|-----------------------|
| 1                  | 1.0                | 95                    |
| 2                  | 0.2                | 50                    |
| 3                  | 0.5                | 68                    |

<sup>a</sup>Reaction conditions: 0.1 mmol of **1a**, 0.2 mmol of **2a**, 1 mol% of  $[\text{Cp}^*\text{RhCl}_2]_2$ , 1.0 mL of acetone, 50 °C, under air. <sup>b</sup>Isolated yield refers to **1a**.

## (C) General procedure for the Synthesis of Substrates 1 and 2.

Substrates **1** were synthesized according to the previous literatures<sup>[1]</sup>.

2-Aminophenol (109 mg, 1.0 mmol) and CH<sub>2</sub>Cl<sub>2</sub> (20 mL) were added into a round bottom bottle, and then aqueous K<sub>2</sub>CO<sub>3</sub> (553 mg, 4.0 mmol) solution (20 mL) and <sup>n</sup>Bu<sub>4</sub>NHSO<sub>4</sub> (17 mg, 0.05 mmol) were added. Next substituted 2-bromoacetophenone (199 mg, 1.0 mmol) dissolved in CH<sub>2</sub>Cl<sub>2</sub> (5 mL) was added dropwise to the reaction mixture. The reaction mixture was stirred at room temperature and monitored by TLC until the consumption of the starting materials. After the reaction finished, the organic layer was extracted with dichloromethane, dried with anhydrous Na<sub>2</sub>SO<sub>4</sub>. The solvent was removed in vacuo. The crude mixture was purified by column chromatography with petroleum ether and EtOAc as eluent.

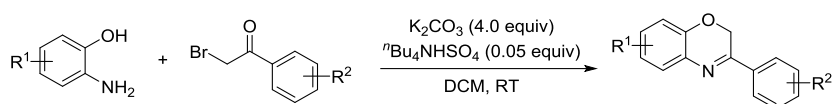

### Scheme S1 List of starting material benzoxazines 1.

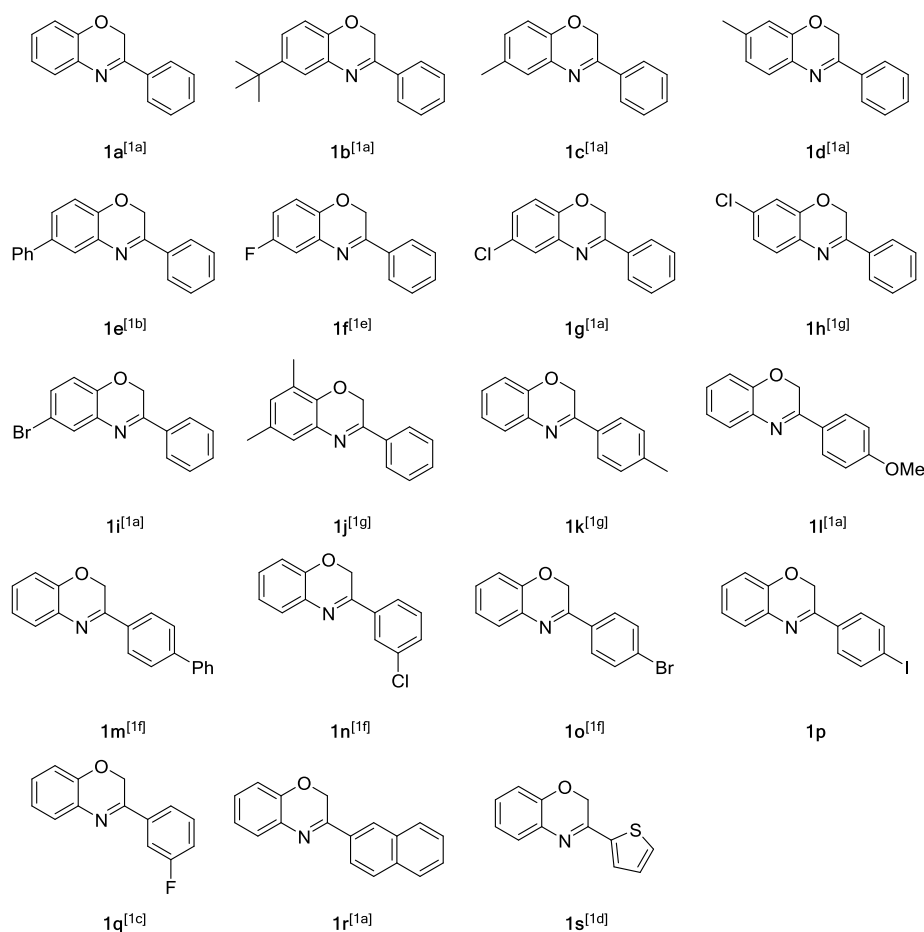

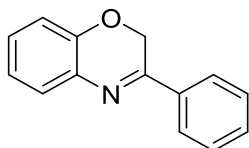

3-Phenyl-2H-benzo[*b*][1,4]oxazine

Compound **1a**: A known compound<sup>[1a]</sup>. White solid. Column chromatography, eluent: Petroleum/EtOAc = 15/1,  $R_f = 0.9$ , 92% yield.

<sup>1</sup>H NMR (500 MHz, CDCl<sub>3</sub>, TMS)  $\delta$  7.95-7.90 (m, 2H), 7.52-7.46 (m, 3H), 7.44 (dd,  $J = 7.5, 1.5$  Hz, 1H), 7.15 (td,  $J = 7.5, 1.5$  Hz, 1H), 7.03 (td,  $J = 7.5, 1.5$  Hz, 1H), 6.92 (dd,  $J = 8.0, 1.5$  Hz, 1H), 5.08 (s, 2H).

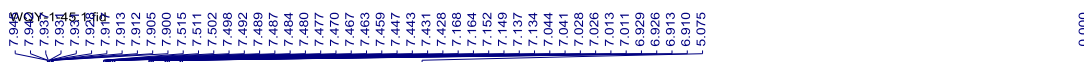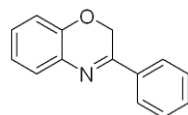

<sup>1</sup>H NMR, 500 MHz, CDCl<sub>3</sub>

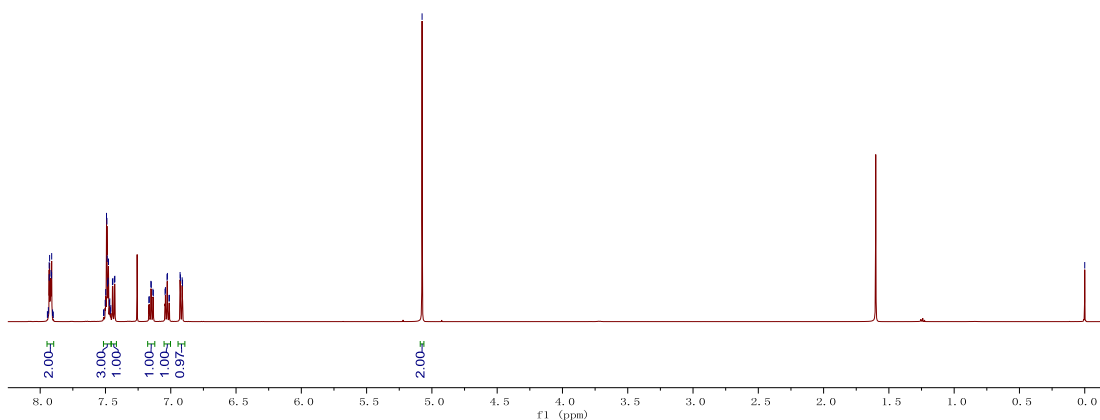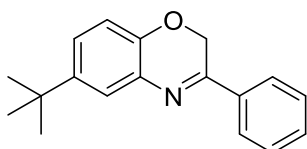

6-(tert-Butyl)-3-phenyl-2H-benzo[*b*][1,4]oxazine

Compound **1b**: A known compound<sup>[1a]</sup>. Yellow oil. Column chromatography, eluent: Petroleum/EtOAc = 15/1,  $R_f = 0.5$ , 67% yield.

<sup>1</sup>H NMR (600 MHz, CDCl<sub>3</sub>, TMS)  $\delta$  7.93-7.89 (m, 2H), 7.50-7.46 (m, 4H), 7.18 (dd,  $J = 8.4, 2.4$  Hz, 1H), 6.85 (d,  $J = 8.4$  Hz, 1H), 5.04 (s, 2H), 1.34 (s, 9H).

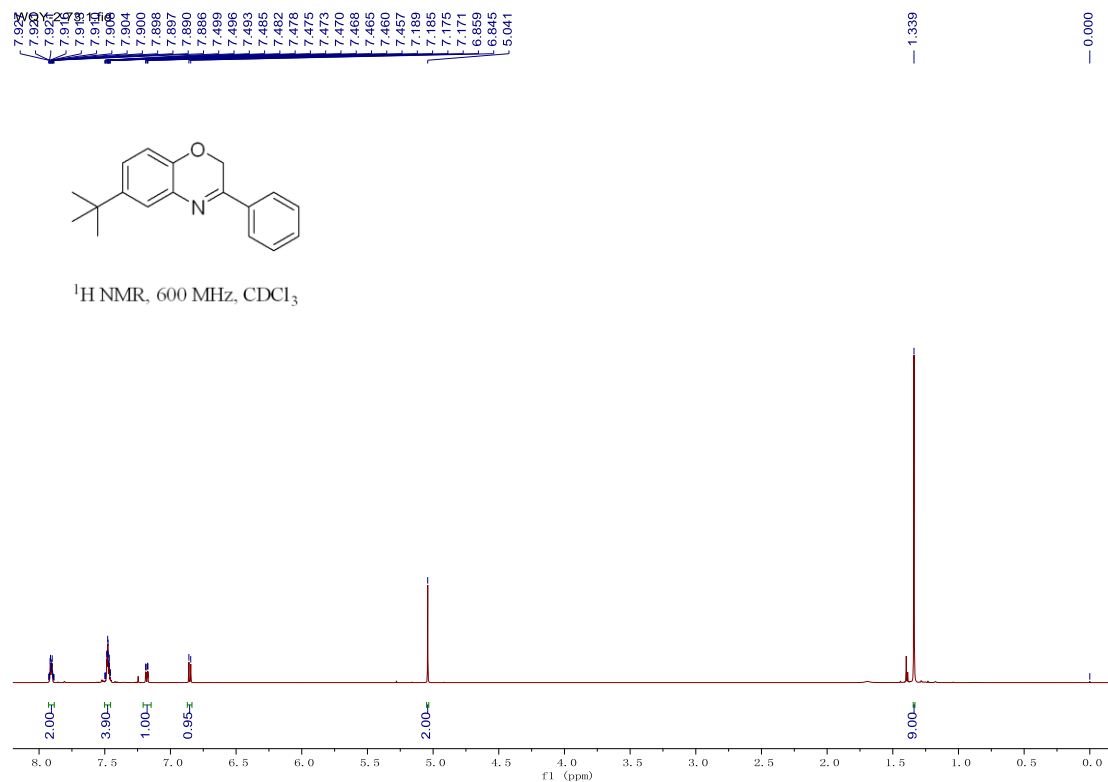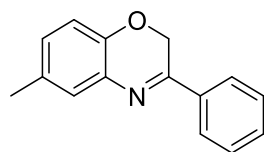

6-Methyl-3-phenyl-2*H*-benzo[*b*][1,4]oxazine

Compound **1c**: A known compound<sup>[1a]</sup>. Yellow solid. Column chromatography, eluent: Petroleum/EtOAc = 15/1, *R<sub>f</sub>* = 0.5, 71% yield.

<sup>1</sup>H NMR (500 MHz, CDCl<sub>3</sub>, TMS)  $\delta$  7.90-7.88 (m, 2H), 7.47-7.44 (m, 3H), 7.25 (s, 1H), 6.94 (d, *J* = 8.0 Hz, 1H), 6.80 (d, *J* = 8.0 Hz, 1H), 5.00 (s, 2H), 2.32 (s, 3H).

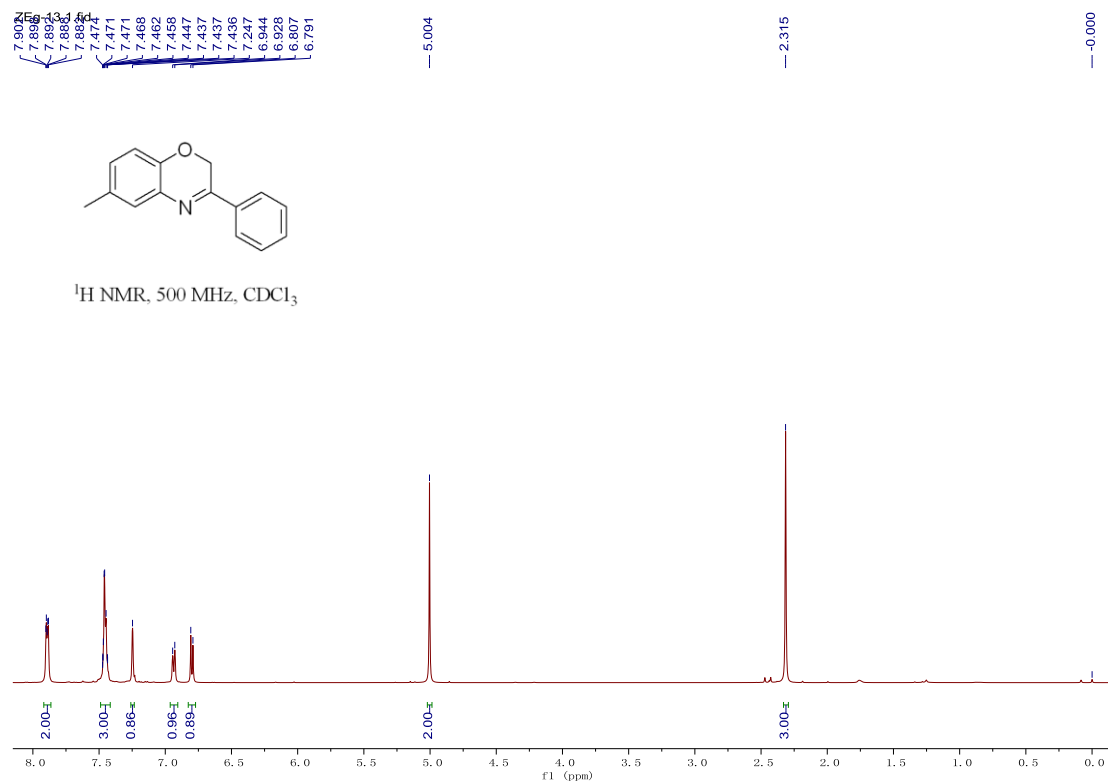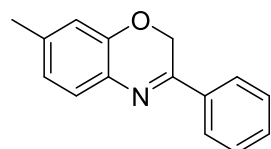

### 7-Methyl-3-phenyl-2H-benzo[*b*][1,4]oxazine

Compound **1d**: A known compound<sup>[1a]</sup>. Yellow solid. Column chromatography, eluent: Petroleum/EtOAc = 15/1,  $R_f$  = 0.6, 77% yield.

<sup>1</sup>H NMR (500 MHz, CDCl<sub>3</sub>, TMS)  $\delta$  7.91-7.87 (m, 2H), 7.48-7.44 (m, 3H), 7.31 (d,  $J$  = 7.5 Hz, 1H), 6.83 (dd,  $J$  = 8.5, 2.0 Hz, 1H), 6.73 (d,  $J$  = 1.0 Hz, 1H), 5.03 (s, 2H), 2.33 (s, 3H).

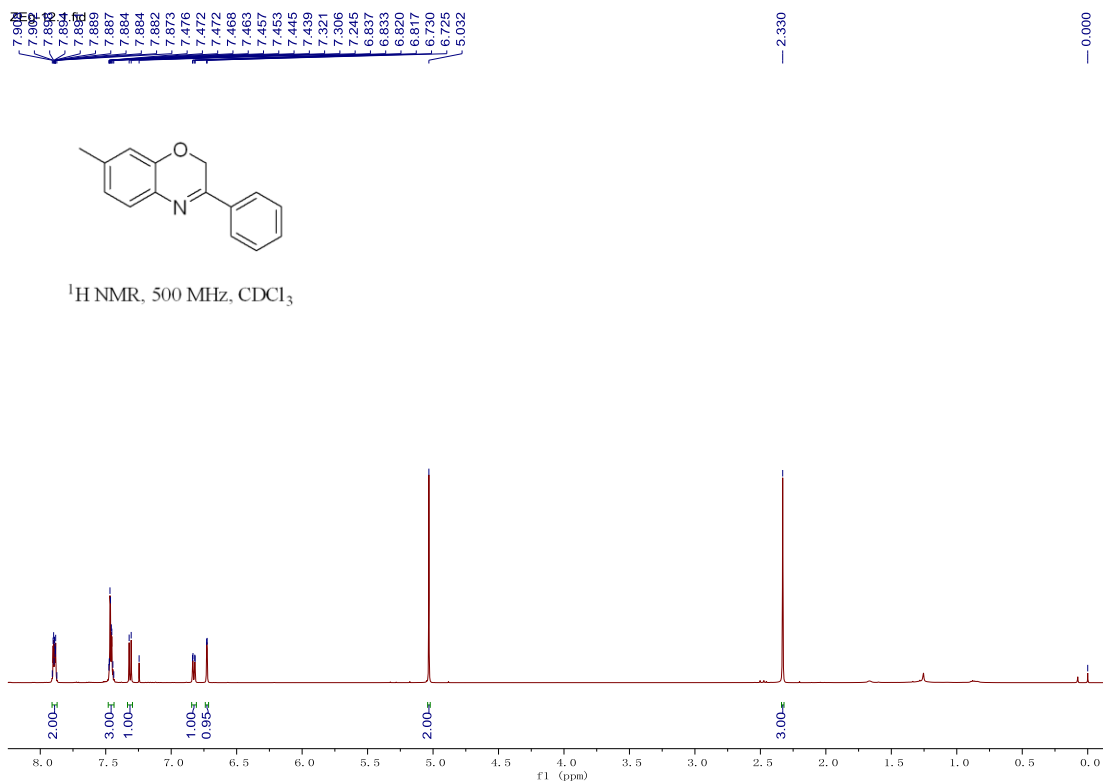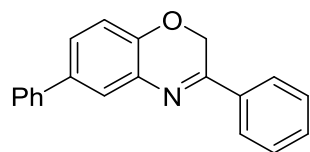

### 3,6-Diphenyl-2H-benzo[*b*][1,4]oxazine

Compound **1e**: A known compound<sup>[1b]</sup>. Yellow solid. Column chromatography, eluent: Petroleum/EtOAc = 15/1,  $R_f$  = 0.6, 56% yield.

<sup>1</sup>H NMR (500 MHz, CDCl<sub>3</sub>, TMS)  $\delta$  7.95-7.93 (m, 2H), 7.70 (d,  $J$  = 2.5 Hz, 1H), 7.62-7.60 (m, 2H), 7.51-7.47 (m, 3H), 7.45-7.42 (m, 2H), 7.40 (dd,  $J$  = 8.5, 2.5 Hz, 1H), 7.34-7.31 (m, 1H), 6.98 (d,  $J$  = 8.5 Hz, 1H), 5.11 (s, 2H).





7.932  
7.926  
7.924  
7.920  
7.916  
7.912  
7.519  
7.517  
7.512  
7.508  
7.505  
7.501  
7.498  
7.492  
7.490  
7.489  
7.477  
7.474  
7.472  
7.469  
7.173  
7.169  
7.166  
7.155  
7.153  
7.150  
7.148  
6.866  
6.864  
6.862  
6.854  
6.852  
6.847  
5.046

-0.000

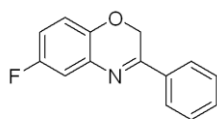

$^1\text{H NMR}$ , 500 MHz,  $\text{CDCl}_3$

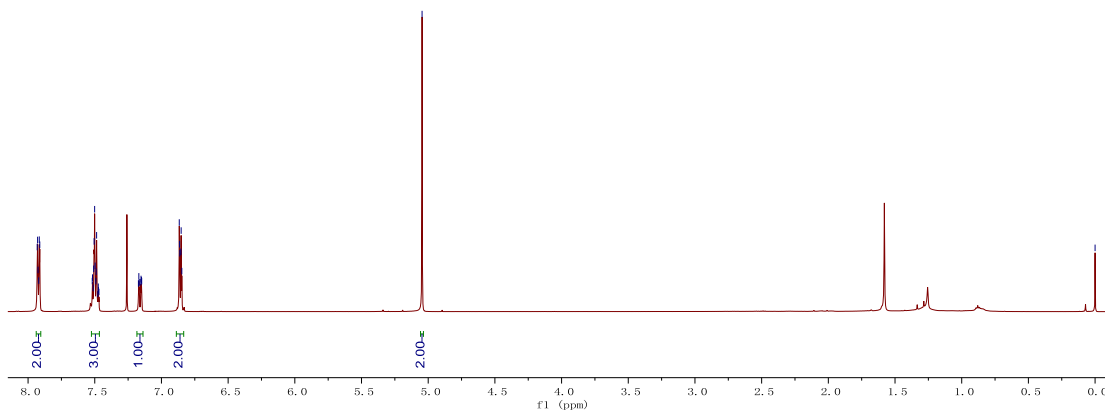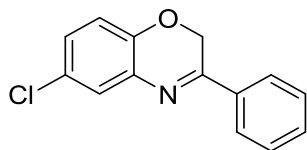

6-Chloro-3-phenyl-2H-benzo[*b*][1,4]oxazine

Compound **1g**: A known compound<sup>[1a]</sup>. Yellow solid. Column chromatography, eluent: Petroleum/EtOAc = 15/1,  $R_f$  = 0.6, 80% yield.

$^1\text{H NMR}$  (500 MHz,  $\text{CDCl}_3$ , TMS)  $\delta$  7.91-7.89 (m, 2H), 7.51-7.46 (m, 3H), 7.42 (d,  $J$  = 2.5 Hz, 1H), 7.09 (dd,  $J$  = 8.5, 2.5 Hz, 1H), 6.84 (d,  $J$  = 8.5 Hz, 1H), 5.05 (s, 2H).

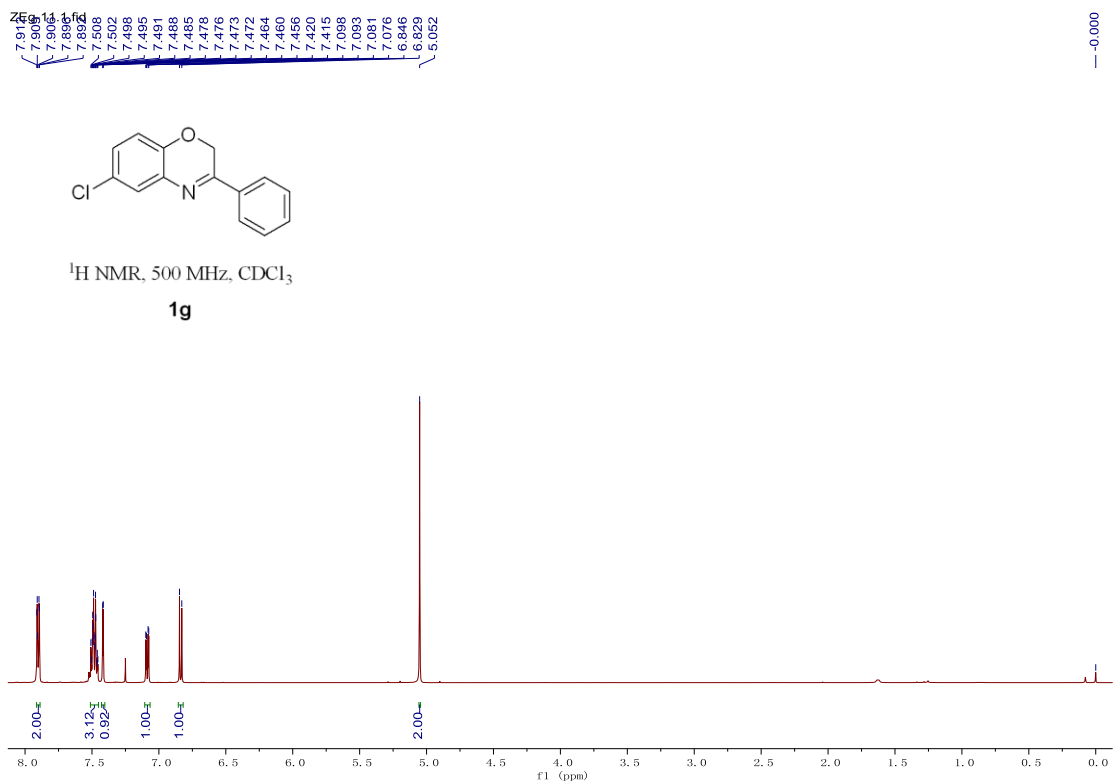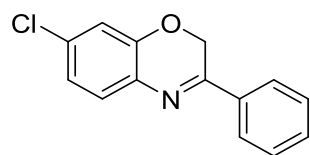

### 7-Chloro-3-phenyl-2H-benzo[*b*][1,4]oxazine

Compound **1h**: A known compound<sup>[1g]</sup>. White solid. Column chromatography, eluent: Petroleum/EtOAc = 15/1, R<sub>f</sub> = 0.6, 80% yield.

<sup>1</sup>H NMR (500 MHz, CDCl<sub>3</sub>, TMS) δ 7.91-7.89 (m, 2H), 7.51-7.46 (m, 3H), 7.34 (d, *J* = 8.0 Hz, 1H), 6.99 (dd, *J* = 8.5, 2.5 Hz, 1H), 6.92 (d, *J* = 2.0 Hz, 1H), 5.07 (s, 2H).

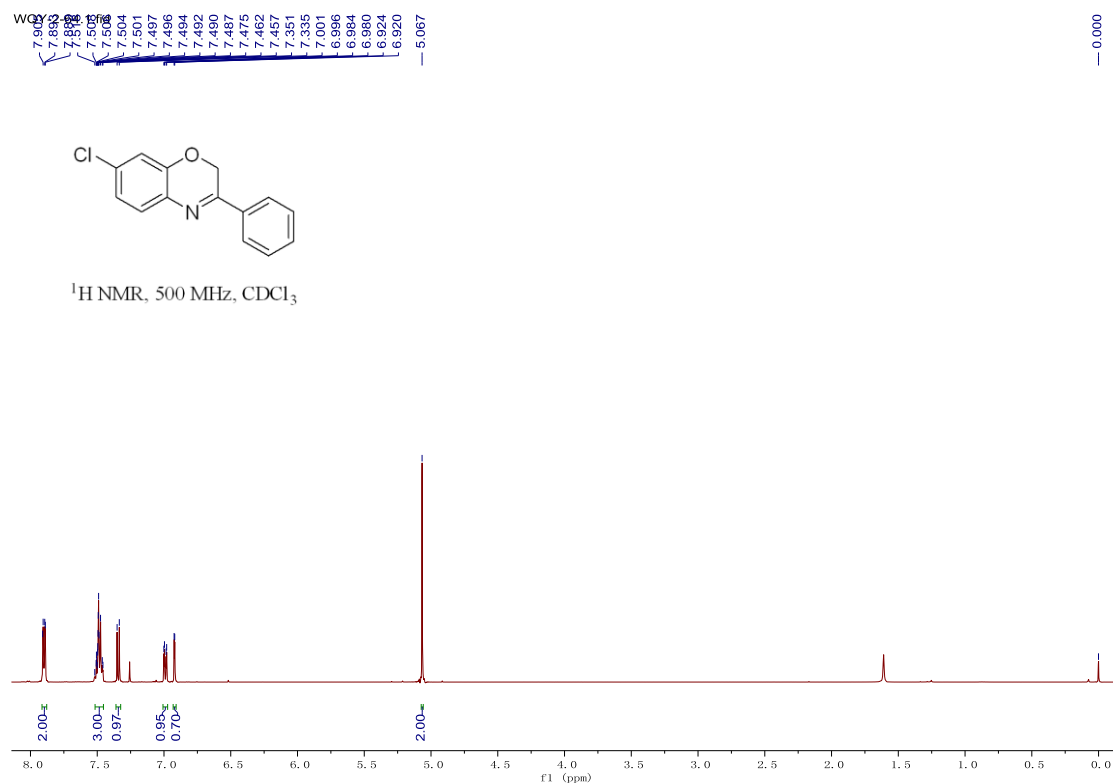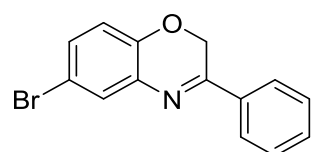

### 6-Bromo-3-phenyl-2H-benzo[b][1,4]oxazine

Compound **1i**: A known compound<sup>[1a]</sup>. White solid. Column chromatography, eluent: Petroleum/EtOAc = 15/1, R<sub>f</sub> = 0.6, 82.5% yield.

<sup>1</sup>H NMR (500 MHz, CDCl<sub>3</sub>, TMS) δ 7.91-7.89 (m, 2H), 7.57 (d, *J* = 2.5 Hz, 1H), 7.53-7.46 (m, 3H), 7.23 (dd, *J* = 8.0, 2.5 Hz, 1H), 6.79 (d, *J* = 8.5 Hz, 1H), 5.06 (s, 2H).

7.915  
7.907  
7.900  
7.893  
7.884  
7.875  
7.570  
7.565  
7.530  
7.527  
7.524  
7.520  
7.512  
7.507  
7.502  
7.496  
7.493  
7.489  
7.483  
7.481  
7.478  
7.468  
7.465  
7.460  
7.242  
7.237  
7.224  
7.220  
6.802  
6.785  
5.062

0.000

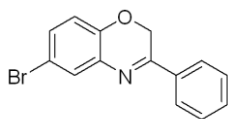

$^1\text{H NMR}$ , 500 MHz,  $\text{CDCl}_3$

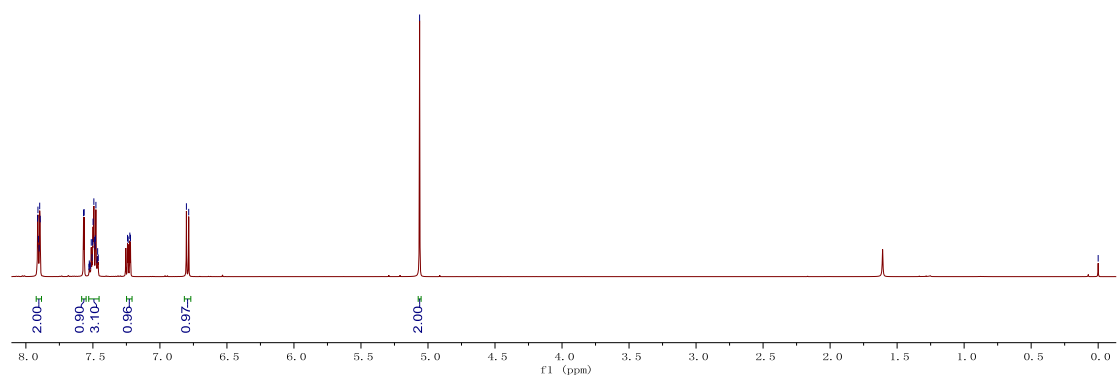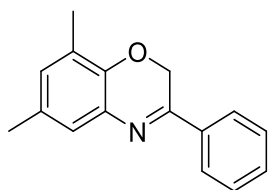

### 6,8-Dimethyl-3-phenyl-2H-benzo[*b*][1,4]oxazine

Compound **1j**: A known compound<sup>[1g]</sup>. Yellow solid. Column chromatography, eluent: Petroleum/EtOAc = 15/1,  $R_f = 0.5$ , 67% yield.

$^1\text{H NMR}$  (500 MHz,  $\text{CDCl}_3$ , TMS)  $\delta$  7.93-7.90 (m, 2H), 7.49-7.46 (m, 3H), 7.11 (d,  $J = 1.0$  Hz, 1H), 6.84-6.83 (m, 1H), 5.04 (s, 2H), 2.29 (s, 3H), 2.21 (s, 3H).

7.925  
7.916  
7.914  
7.911  
7.909  
7.905  
7.903  
7.900  
7.895  
7.487  
7.484  
7.480  
7.476  
7.475  
7.471  
7.467  
7.463  
7.460  
7.110  
7.108  
6.841  
6.839  
6.838  
6.837  
6.835  
6.834  
5.038

2.293  
2.213

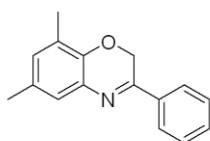

$^1\text{H NMR}$ , 500 MHz,  $\text{CDCl}_3$

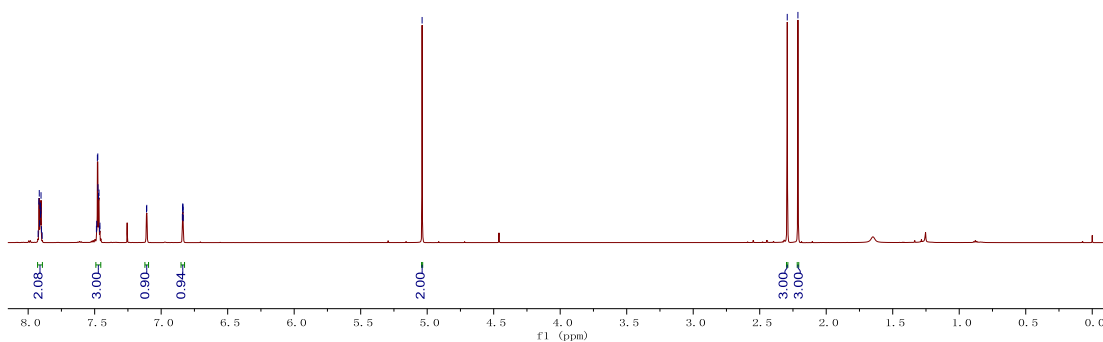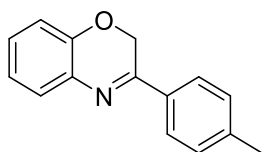

### 3-(*p*-Tolyl)-2*H*-benzo[*b*][1,4]oxazine

Compound **1k**: A known compound<sup>[1g]</sup>. White solid. Column chromatography, eluent: Petroleum/EtOAc = 15/1,  $R_f$  = 0.5, 79% yield.

$^1\text{H NMR}$  (500 MHz,  $\text{CDCl}_3$ , TMS)  $\delta$  7.80 (d,  $J$  = 8.0 Hz, 2H), 7.41 (d,  $J$  = 8.0 Hz, 1H), 7.26 (d,  $J$  = 8.0 Hz, 2H), 7.12 (t,  $J$  = 7.5 Hz, 1H), 7.00 (t,  $J$  = 7.5 Hz, 1H), 6.90 (d,  $J$  = 8.0 Hz, 1H), 5.02 (s, 2H), 2.39 (s, 3H).

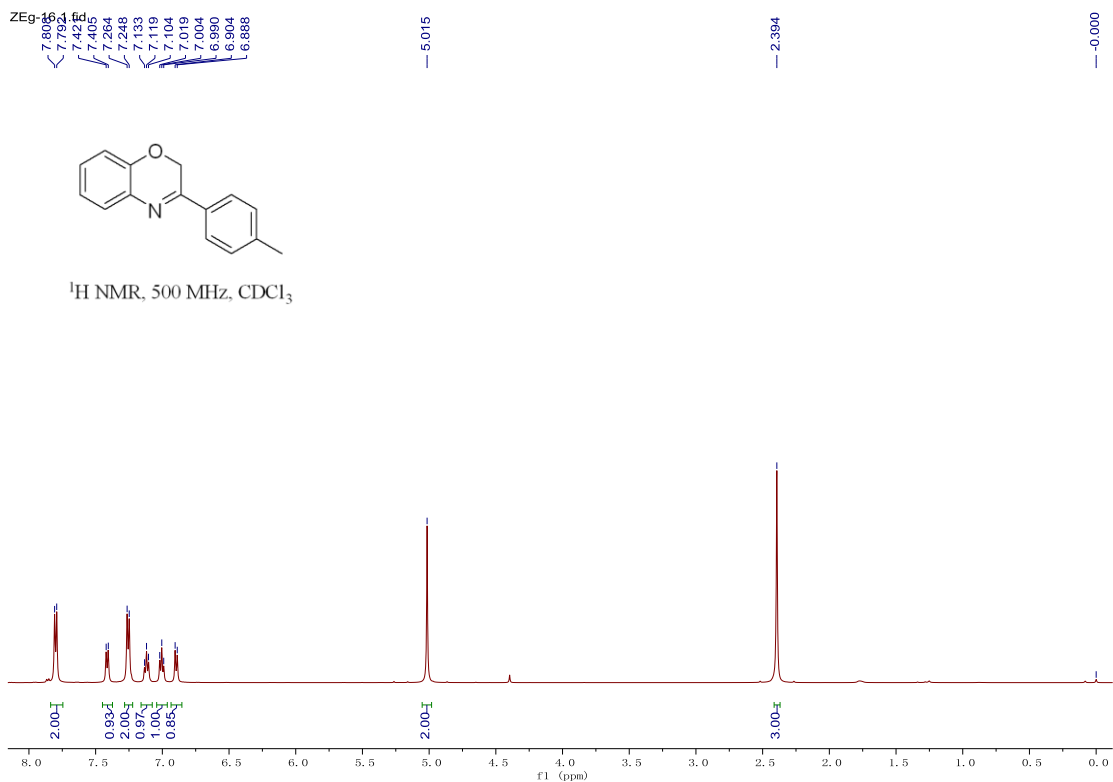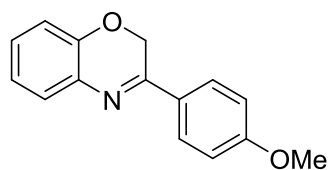

### 3-(4-Methoxyphenyl)-2H-benzo[*b*][1,4]oxazine

Compound **II**: A known compound<sup>[1a]</sup>. Yellow solid. Column chromatography, eluent: Petroleum/EtOAc = 15/1,  $R_f = 0.3$ , 60% yield.

<sup>1</sup>H NMR (500 MHz, CDCl<sub>3</sub>, TMS)  $\delta$  7.89 (dt,  $J = 8.5, 2.0$  Hz, 2H), 7.40 (dd,  $J = 7.5, 1.5$  Hz, 1H), 7.12 (td,  $J = 7.5, 1.5$  Hz, 1H), 7.03-6.96 (m, 3H), 6.90 (dd,  $J = 8.0, 1.5$  Hz, 1H), 5.03 (s, 2H), 3.87 (s, 3H).

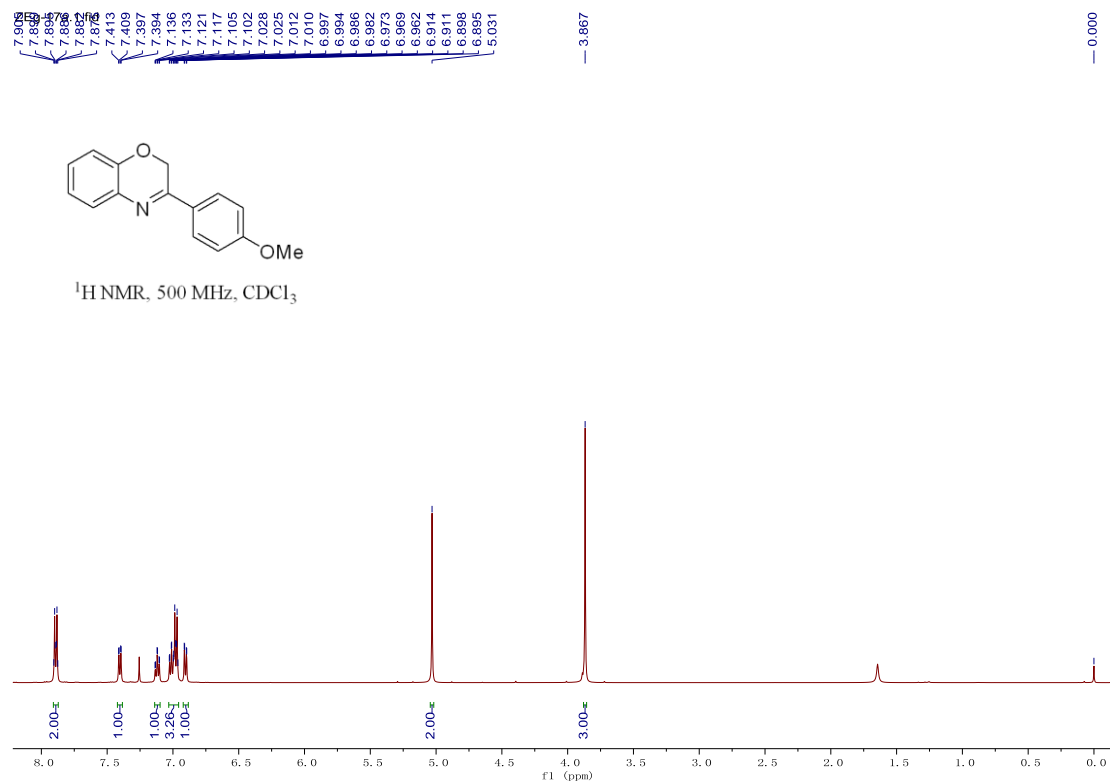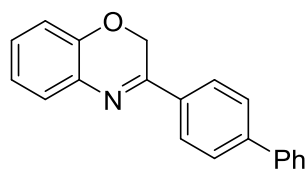

### 3-([1,1'-Biphenyl]-4-yl)-2H-benzo[*b*][1,4]oxazine

Compound **1m**: A known compound<sup>[1f]</sup>. Yellow solid. Column chromatography, eluent: Petroleum/EtOAc = 15/1,  $R_f = 0.5$ , 39% yield.

<sup>1</sup>H NMR (500 MHz, CDCl<sub>3</sub>, TMS)  $\delta$  7.99 (d,  $J = 8.0$  Hz, 2H), 7.70 (d,  $J = 8.0$  Hz, 2H), 7.64 (d,  $J = 7.5$  Hz, 2H), 7.48-7.44 (m, 3H), 7.37 (t,  $J = 7.5$  Hz, 1H), 7.15 (t,  $J = 7.5$  Hz, 1H), 7.03 (t,  $J = 7.5$  Hz, 1H), 6.93 (d,  $J = 8.0$  Hz, 1H), 5.09 (s, 2H).



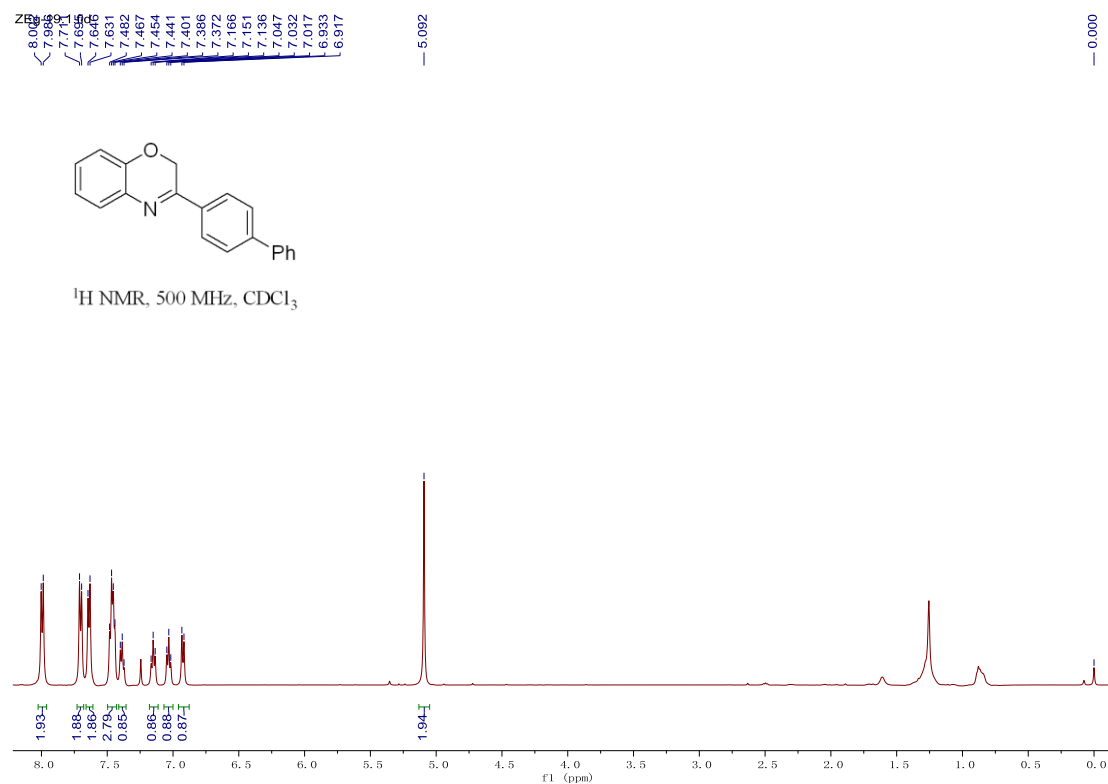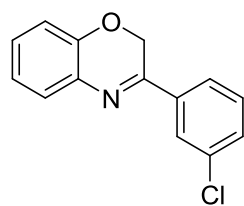

### 3-(3-Chlorophenyl)-2H-benzo[*b*][1,4]oxazine

Compound **1n**: A known compound<sup>[11]</sup>. White solid. Column chromatography, eluent: Petroleum/EtOAc = 15/1,  $R_f = 0.5$ , 81% yield.

<sup>1</sup>H NMR (500 MHz, CDCl<sub>3</sub>, TMS)  $\delta$  7.95 (t,  $J = 1.5$  Hz, 1H), 7.73 (dt,  $J = 8.0, 1.5$  Hz, 1H), 7.46-7.38 (m, 3H), 7.16 (td,  $J = 7.5, 1.5$  Hz, 1H), 7.03 (td,  $J = 7.5, 1.5$  Hz, 1H), 6.91 (dd,  $J = 8.0, 1.5$  Hz, 1H), 5.02 (s, 2H).

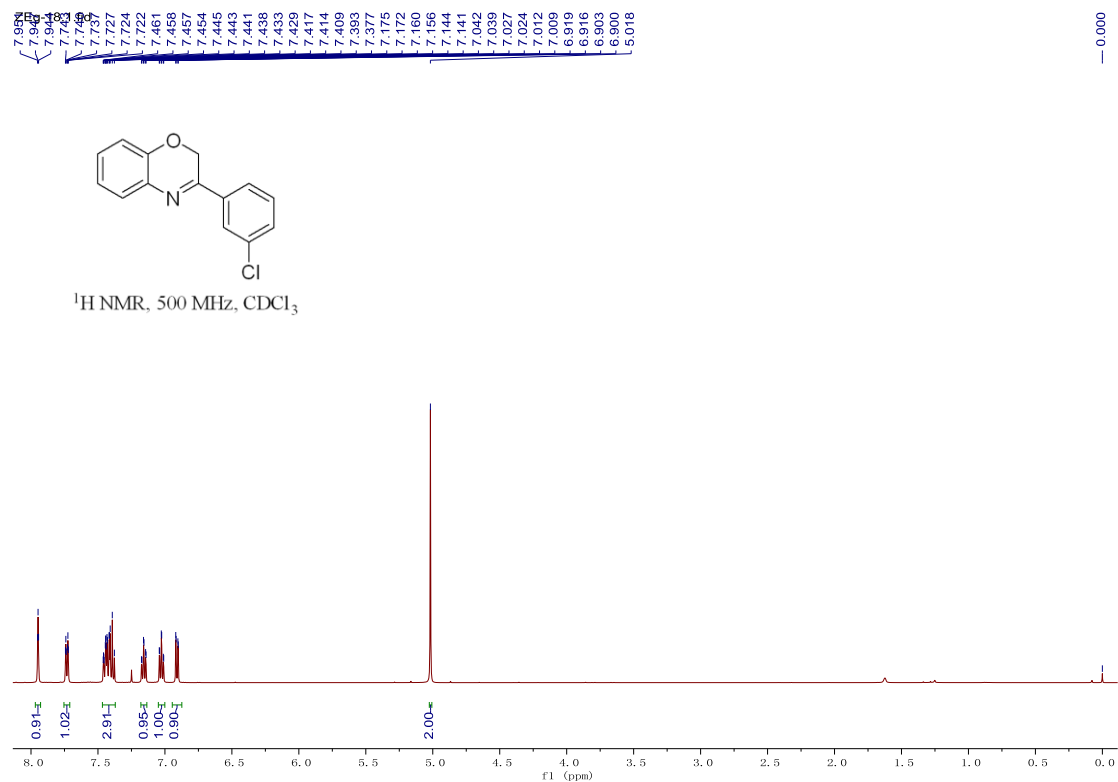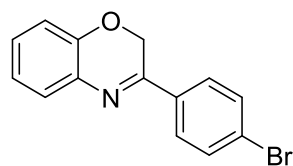

### 3-(4-Bromophenyl)-2*H*-benzo[*b*][1,4]oxazine

Compound **10**: A known compound<sup>[1f]</sup>. Yellow solid. Column chromatography, eluent: Petroleum/EtOAc = 15/1, *R<sub>f</sub>* = 0.5, 62% yield.

<sup>1</sup>H NMR (500 MHz, CDCl<sub>3</sub>, TMS) δ 7.78 (d, *J* = 8.0 Hz, 2H), 7.60 (d, *J* = 8.5 Hz, 2H), 7.41 (d, *J* = 7.5 Hz, 1H), 7.15 (t, *J* = 7.5 Hz, 1H), 7.02 (t, *J* = 7.5 Hz, 1H), 6.91 (d, *J* = 8.0 Hz, 1H), 5.02 (s, 2H).

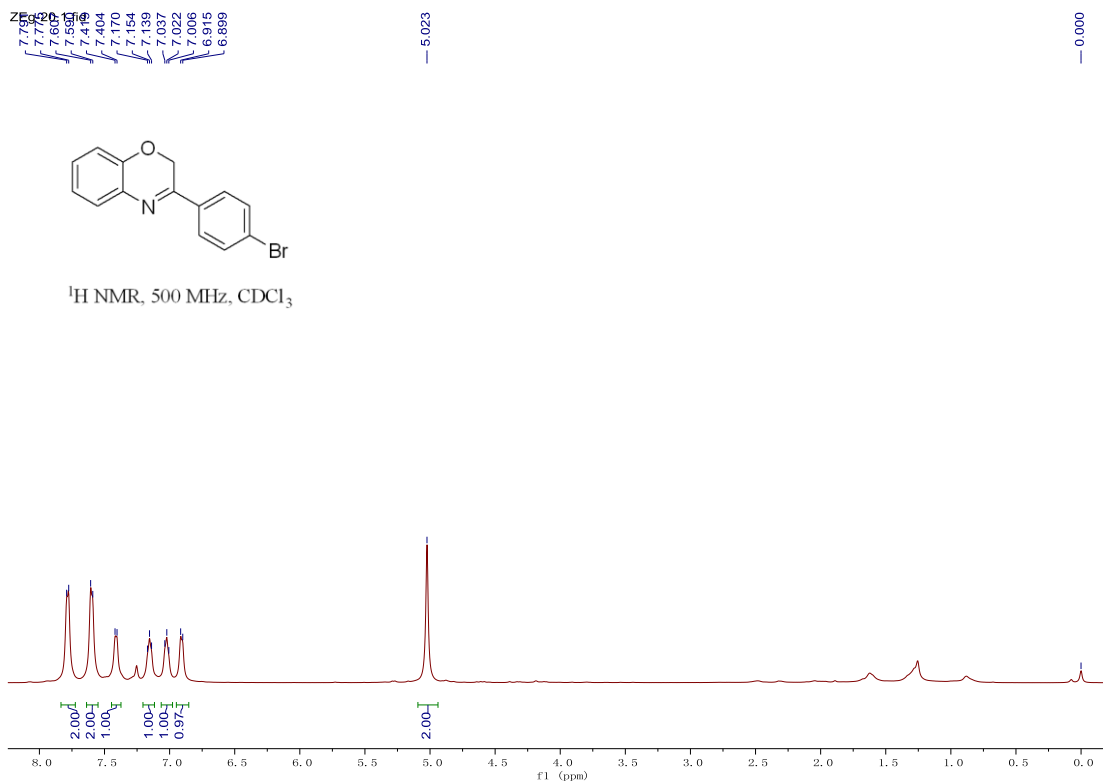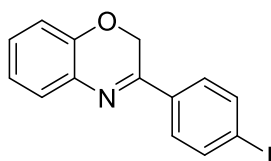

### 3-(4-Iodophenyl)-2*H*-benzo[*b*][1,4]oxazine

Compound **1p**: A white solid. Column chromatography, eluent: Petroleum/EtOAc = 15/1, *R<sub>f</sub>* = 0.8, 89% yield. m.p. 148-150 °C.

<sup>1</sup>H NMR (500 MHz, CDCl<sub>3</sub>, TMS) δ 7.82 (d, *J* = 9.0 Hz, 2H), 7.64 (d, *J* = 8.5 Hz, 2H), 7.42 (dd, *J* = 7.5, 1.5 Hz, 1H), 7.16 (td, *J* = 7.5, 1.5 Hz, 1H), 7.02 (td, *J* = 7.5, 1.5 Hz, 1H), 6.91 (dd, *J* = 8.0, 1.5 Hz, 1H), 5.02 (s, 2H).

<sup>13</sup>C NMR (125 MHz, CDCl<sub>3</sub>) δ 157.7, 146.4, 138.1, 134.9, 133.7, 129.1, 128.05, 127.99, 122.6, 115.7, 98.2, 62.6.

IR (KBr)  $\nu$ (cm<sup>-1</sup>): 3032, 1608, 1578, 1477, 1400, 1211, 1003, 975, 883, 756 cm<sup>-1</sup>.

HRMS (ESI) calcd. for [C<sub>14</sub>H<sub>10</sub>INO+H]<sup>+</sup> requires 335.98798, found 335.98779 [M+H]<sup>+</sup>.

7.828  
7.805  
7.659  
7.633  
7.425  
7.422  
7.410  
7.406  
7.175  
7.172  
7.160  
7.156  
7.144  
7.141  
7.090  
7.086  
7.026  
7.023  
7.010  
7.007  
6.919  
6.916  
6.903  
6.900

5.023

0.000

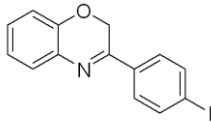

<sup>1</sup>H NMR, 500 MHz, CDCl<sub>3</sub>

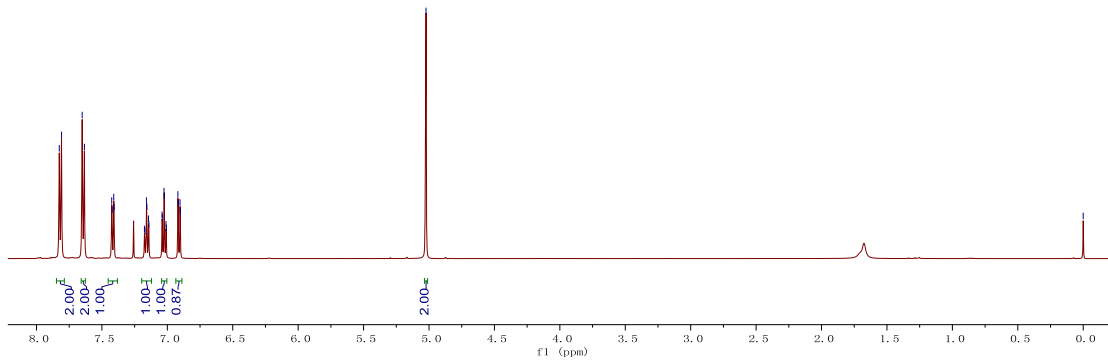

ZEH-190.1.fid

157.712  
146.358  
138.063  
134.898  
133.718  
129.073  
128.048  
127.988  
122.591  
115.729  
98.182  
77.160  
62.611

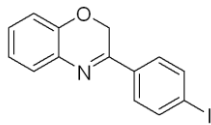

<sup>13</sup>C NMR, 125 MHz, CDCl<sub>3</sub>

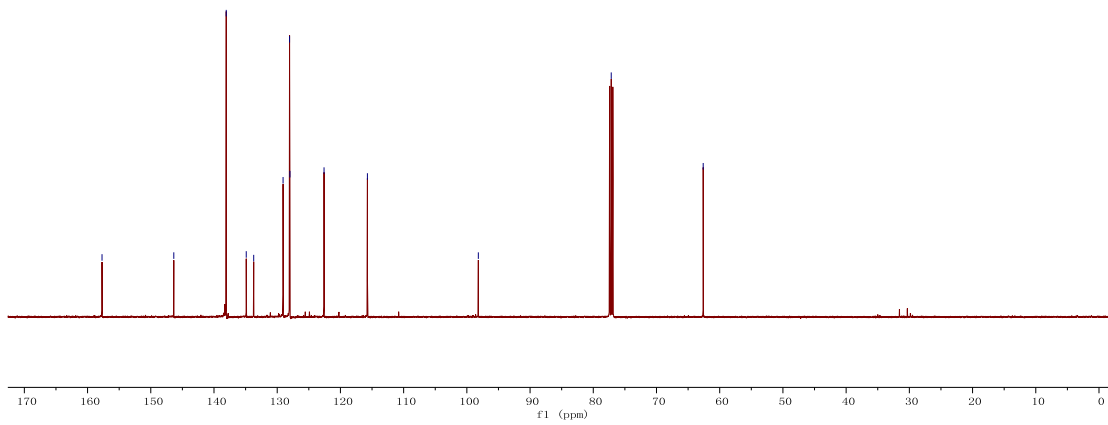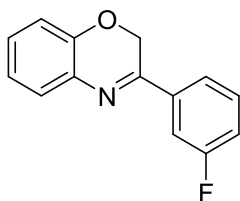

### 3-(3-Fluorophenyl)-2H-benzo[*b*][1,4]oxazine

Compound **1q**: A known compound<sup>[1c]</sup>. White solid. Column chromatography, eluent: Petroleum/EtOAc = 15/1,  $R_f = 0.8$ , 89% yield.

<sup>1</sup>H NMR (500 MHz, CDCl<sub>3</sub>, TMS)  $\delta$  7.70 (dt,  $J = 10.0, 2.0$  Hz, 1H), 7.62 (dt,  $J = 8.0, 1.5$  Hz, 1H), 7.46-7.42 (m, 2H), 7.21-7.15 (m, 2H), 7.03 (td,  $J = 7.5, 1.5$  Hz, 1H), 6.92 (dd,  $J = 8.0, 1.5$  Hz, 1H), 5.04 (s, 2H).

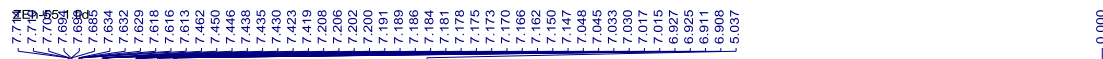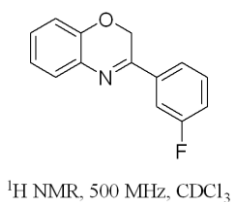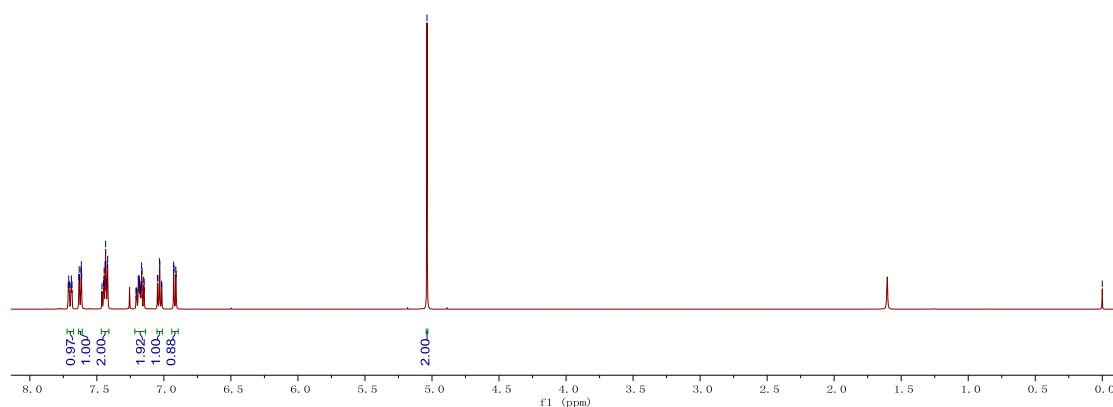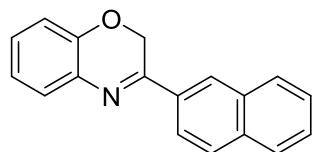

### 3-(Naphthalen-2-yl)-2H-benzo[*b*][1,4]oxazine

Compound **1r**: A known compound<sup>[1a]</sup>. Yellow solid. Column chromatography, eluent: Petroleum/EtOAc = 15/1,  $R_f = 0.8$ , 60% yield.

<sup>1</sup>H NMR (500 MHz, CDCl<sub>3</sub>, TMS)  $\delta$  8.24 (d,  $J = 8.5$  Hz, 1H), 8.19 (s, 1H), 7.92 (d,  $J = 8.5$  Hz, 2H), 7.87 (d,  $J = 8.0$  Hz, 1H), 7.57-7.52 (m, 2H), 7.48 (d,  $J = 7.5$  Hz, 1H), 7.17 (t,  $J = 7.5$  Hz, 1H), 7.05 (t,  $J = 7.5$  Hz, 1H), 6.95 (d,  $J = 8.0$  Hz, 1H), 5.20 (s, 2H).

ZEq-72.11  
 8.226  
 8.190  
 7.832  
 7.816  
 7.878  
 7.862  
 7.572  
 7.559  
 7.545  
 7.532  
 7.519  
 7.491  
 7.476  
 7.180  
 7.165  
 7.149  
 7.061  
 7.046  
 7.031  
 6.854  
 6.838

— 5.197

— 0.000

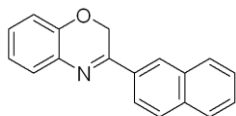

<sup>1</sup>H NMR, 500 MHz, CDCl<sub>3</sub>

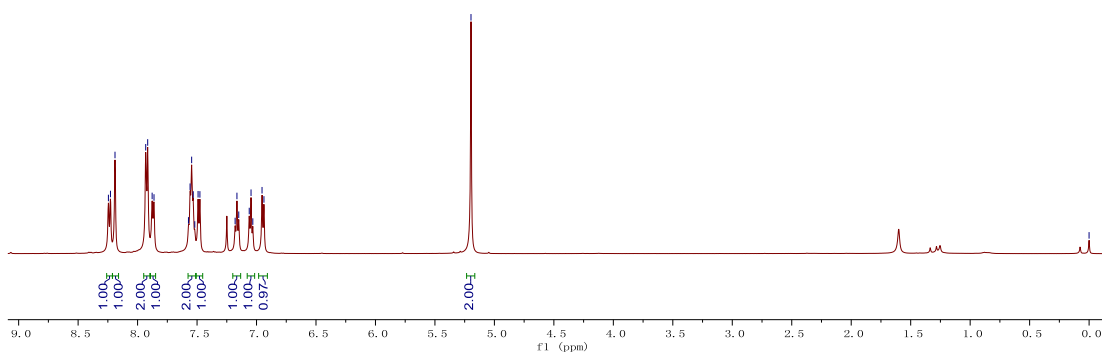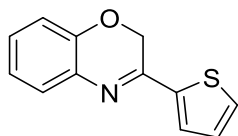

### 3-(Thiophen-2-yl)-2H-benzo[*b*][1,4]oxazine

Compound **1s**: A known compound<sup>[1d]</sup>. Yellow solid. Column chromatography, eluent: Petroleum/EtOAc = 15/1, R<sub>f</sub> = 0.6, 60% yield.

<sup>1</sup>H NMR (500 MHz, CDCl<sub>3</sub>, TMS) δ 7.54 (dd, *J* = 5.0, 1.0 Hz, 1H), 7.41 (dd, *J* = 4.0, 1.0 Hz, 1H), 7.39 (dd, *J* = 7.5, 1.5 Hz, 1H), 7.14-7.11 (m, 2H), 7.01 (td, *J* = 7.5, 1.5 Hz, 1H), 6.91 (dd, *J* = 8.0, 1.0 Hz, 1H), 4.99 (s, 2H).

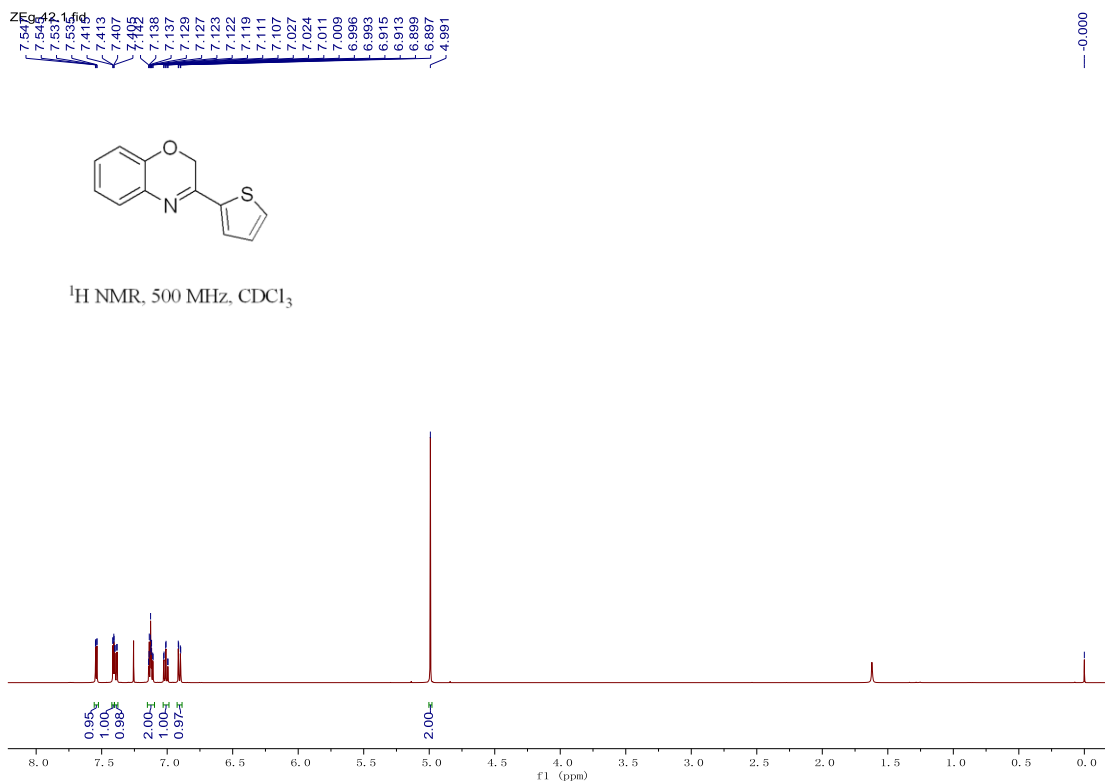

Most of the quinone compounds **2** employed in this work were commercially available, used as received from commercial sources, and are listed below. **2c** and **2e** were prepared following a reported procedure<sup>[2]</sup>.

**Scheme S2 List of starting material quinone compounds **2**.**

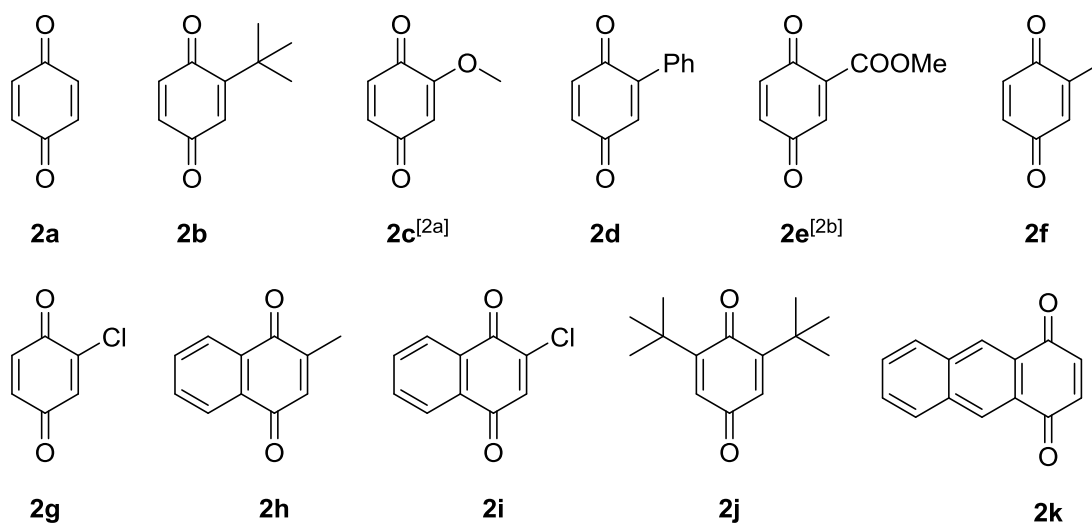

To a stirred solution of 2-methoxybenzene-1,4-diol (140 mg, 1.0 mmol) in acetic acid (7 mL), was added PIFA (860 mg, 2.0 mmol). The mixture was stirred at room temperature for a few minutes. Then the reaction was diluted with water and quenched with a saturated aqueous solution of NaHCO<sub>3</sub>. Aqueous layer was extracted three times with DCM, the combined organic layers were dried over Na<sub>2</sub>SO<sub>4</sub> and concentrated in vacuo. The crude product was rapidly filtered through a plug of silica with DCM as eluent to afford the desired product **2c** (125 mg, 90% yield).

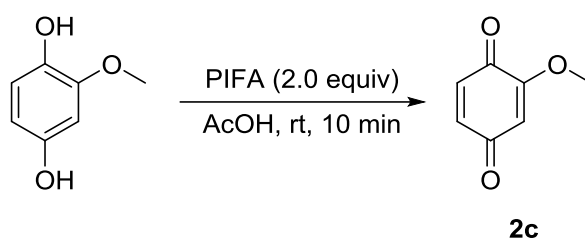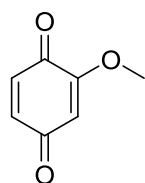

2-Methoxycyclohexa-2,5-diene-1,4-dione

Compound **2c**: A known compound<sup>[2a]</sup>. Yellow solid. Column chromatography, eluent: CH<sub>2</sub>Cl<sub>2</sub>, R<sub>f</sub> = 0.5, 90% yield.

<sup>1</sup>H NMR (500 MHz, CDCl<sub>3</sub>, TMS)  $\delta$  6.73-6.72 (m, 2H), 5.96 (s, 1H), 3.84 (s, 3H).



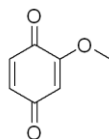

<sup>1</sup>H NMR, 500 MHz, CDCl<sub>3</sub>

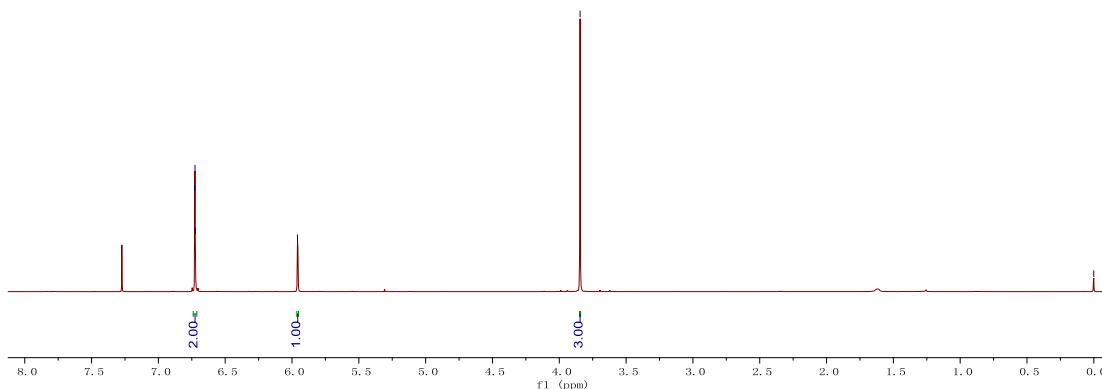

To a solution of methyl 2,5-dihydroxybenzoate (252 mg, 1.5 mmol) in DCM (3 mL) was added DDQ (341 mg, 1.5 mmol) portionwise at room temperature. After 2 h, the reaction mixture was diluted with DCM (15 mL), then washed with a mixture of water (10 mL) and saturated aqueous sodium bicarbonate (2 mL) five times. Combined organics were washed with brine (20 mL), dried over Na<sub>2</sub>SO<sub>4</sub>, and concentrated in vacuo to afford generally orange solids **2e** (166 mg, 67% yield).

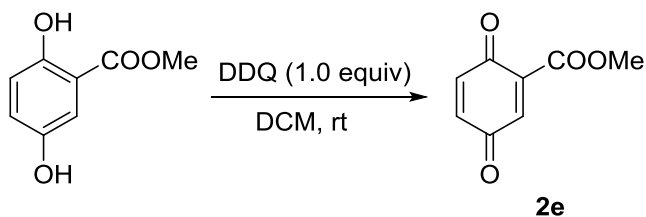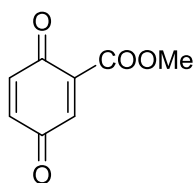

Methyl 3,6-dioxocyclohexa-1,4-diene-1-carboxylate

Compound **2e**: A known compound<sup>[2b]</sup>. Yellow solid. Recrystallize, 67% yield.

$^1\text{H NMR}$  (500 MHz,  $\text{CDCl}_3$ , TMS)  $\delta$  7.13 (d,  $J = 1.5$  Hz, 1H), 6.84 (d,  $J = 2.5$  Hz, 2H), 3.92 (s, 3H).

Zeg-59.1.fid

7.127  
7.124  
6.841  
6.836

3.921

0.000

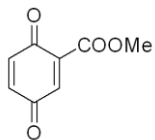

$^1\text{H NMR}$ , 500 MHz,  $\text{CDCl}_3$

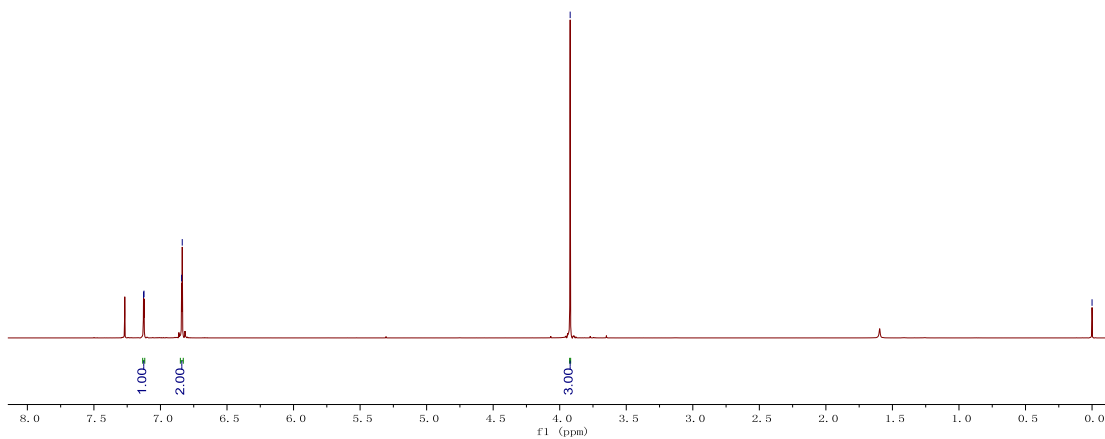

## (D) General Procedure for Intermolecular Annulation and Analytical

### Data of Products 3a-3z.

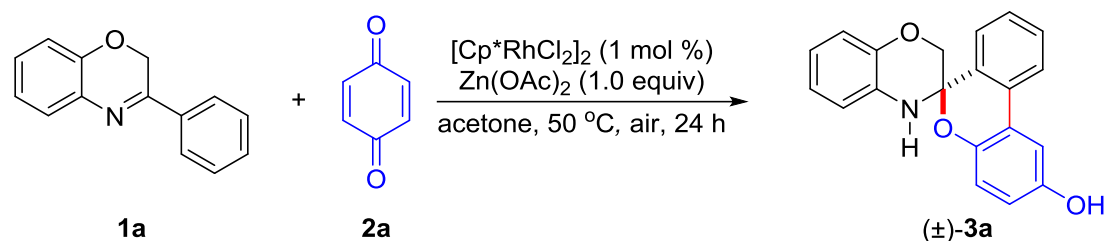

Under air atmosphere, acetone (0.1 M) was added to a mixture of **1a** (20.9 mg, 0.1 mmol), **2a** (21.7 mg, 0.2 mmol),  $[\text{Cp}^*\text{RhCl}_2]_2$  (0.6 mg, 1 mol%),  $\text{Zn}(\text{OAc})_2$  (18.3 mg, 0.1 mmol). The reaction system was stirred for 24 h at 50 °C until **1a** was completely consumed by TLC monitoring. Then the solvent was removed under reduced pressure and the residue was purified by a silica gel flash column chromatography (eluent: petroleum ether/EtOAc, 4/1) to give the product **3a** (30.0 mg, 95% yield) as a white solid.

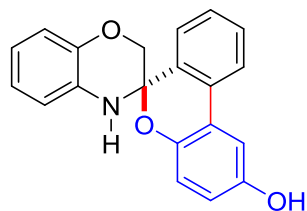

**(±)-2H,4H-spiro[benzo[*b*][1,4]oxazine-3,6'-benzo[*c*]chromen]-2'-ol**

Compound **3a**: a white solid. Column chromatography, eluent: Petroleum/EtOAc = 4/1,  $R_f = 0.25$ , 30.0 mg, 95% yield. m.p. 118-124 °C.

$^1\text{H NMR}$  (500 MHz, acetone- $d_6$ )  $\delta$  8.23-8.16 (m, 1H), 7.83 (d,  $J=8.0$  Hz, 1H), 7.58 (d,  $J=7.5$  Hz, 1H), 7.53-7.49 (m, 1H), 7.45-7.40 (m, 1H), 7.34-7.33 (m, 1H), 6.90 (dd,  $J = 7.5, 1.5$  Hz, 1H), 6.84-6.77 (m, 4H), 6.73-6.69 (m, 1H), 6.48 (s, 1H), 4.35 (dd,  $J = 11.0, 2.5$  Hz, 1H), 3.82 (d,  $J = 11.0$  Hz, 1H).

$^{13}\text{C NMR}$  (125 MHz, acetone- $d_6$ )  $\delta$  153.3, 145.8, 144.1, 133.2, 133.1, 131.7, 130.4, 129.3, 126.3, 123.2, 123.0, 122.4, 119.8, 119.6, 117.8, 116.8, 116.5, 110.0, 84.2, 68.2.

**IR (KBr)**  $\nu(\text{cm}^{-1})$ : 3358, 1691, 1611, 1496, 1311, 1208, 1039, 942, 854, 748  $\text{cm}^{-1}$ .

HRMS (ESI) calcd. for  $[C_{20}H_{15}NO_3+H]^+$  requires 318.11247, found 318.11252  
[M+H]<sup>+</sup>.

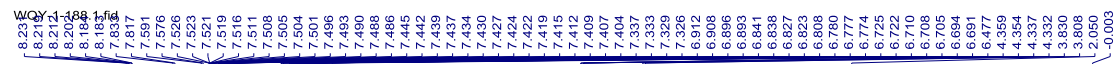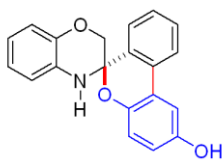

<sup>1</sup>H NMR, 500 MHz, acetone-*d*<sub>6</sub>

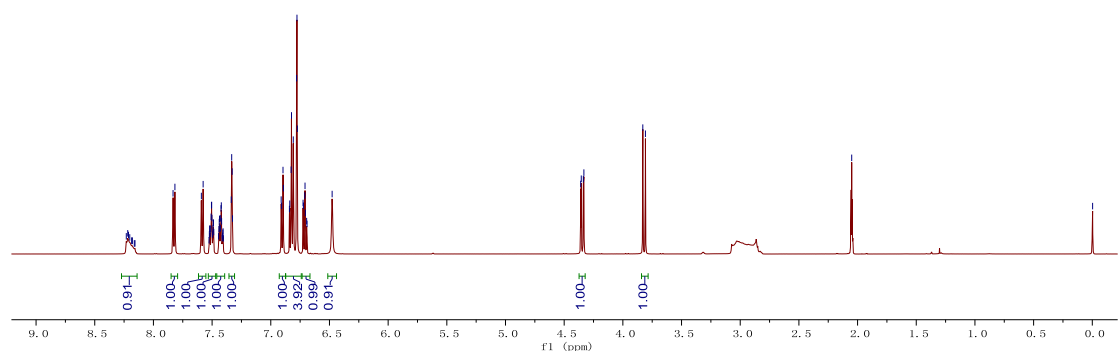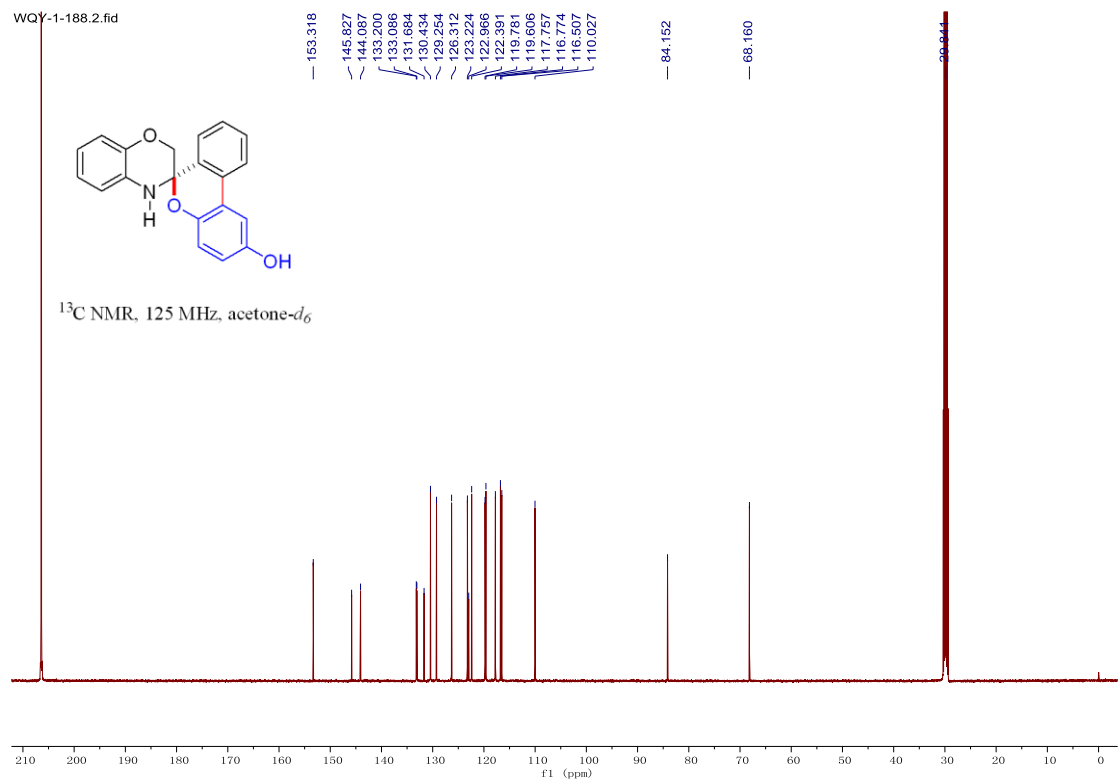

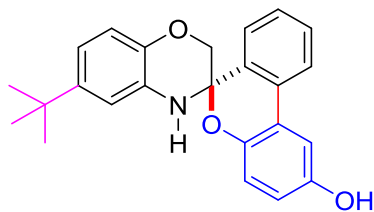

(±)-6-(*tert*-Butyl)-2H,4H-spiro[benzo[*b*][1,4]oxazine-3,6'-benzo[*c*]chromen]-2'-ol

Compound **3b**: a white solid. Column chromatography, eluent: Petroleum/EtOAc = 4/1,  $R_f = 0.25$ , 34.7 mg, 93% yield. m.p. 147-151 °C.

$^1\text{H NMR}$  (500 MHz, acetone- $d_6$ )  $\delta$  8.15 (s, 1H), 7.82 (dd,  $J = 7.5, 1.5$  Hz, 1H), 7.60 (dd,  $J = 7.5, 1.5$  Hz, 1H), 7.50 (td,  $J = 7.5, 1.5$  Hz, 1H), 7.42 (td,  $J = 7.5, 1.5$  Hz, 1H), 7.34-7.33 (m, 1H), 6.98 (d,  $J = 2.5$  Hz, 1H), 6.78-6.72 (m, 4H), 6.36 (d,  $J = 2.0$  Hz, 1H), 4.32 (dd,  $J = 11.0, 2.5$  Hz, 1H), 3.78 (d,  $J = 11.5$  Hz, 1H), 1.29 (s, 9H).

$^{13}\text{C NMR}$  (125 MHz, acetone- $d_6$ )  $\delta$  153.2, 146.0, 145.1, 141.9, 133.4, 132.3, 130.4, 129.2, 126.4, 123.2, 119.6, 117.7, 116.7, 116.2, 113.7, 110.0, 84.4, 68.2, 34.7, 31.9.

**IR (KBr)**  $\nu(\text{cm}^{-1})$ : 3360, 2961, 1493, 1313, 1296, 1200, 982, 813, 733, 642  $\text{cm}^{-1}$ .

**HRMS (ESI)** calcd. for  $[\text{C}_{24}\text{H}_{23}\text{NO}_3 + \text{H}]^+$  requires 374.17507, found 374.17490  $[\text{M} + \text{H}]^+$ .

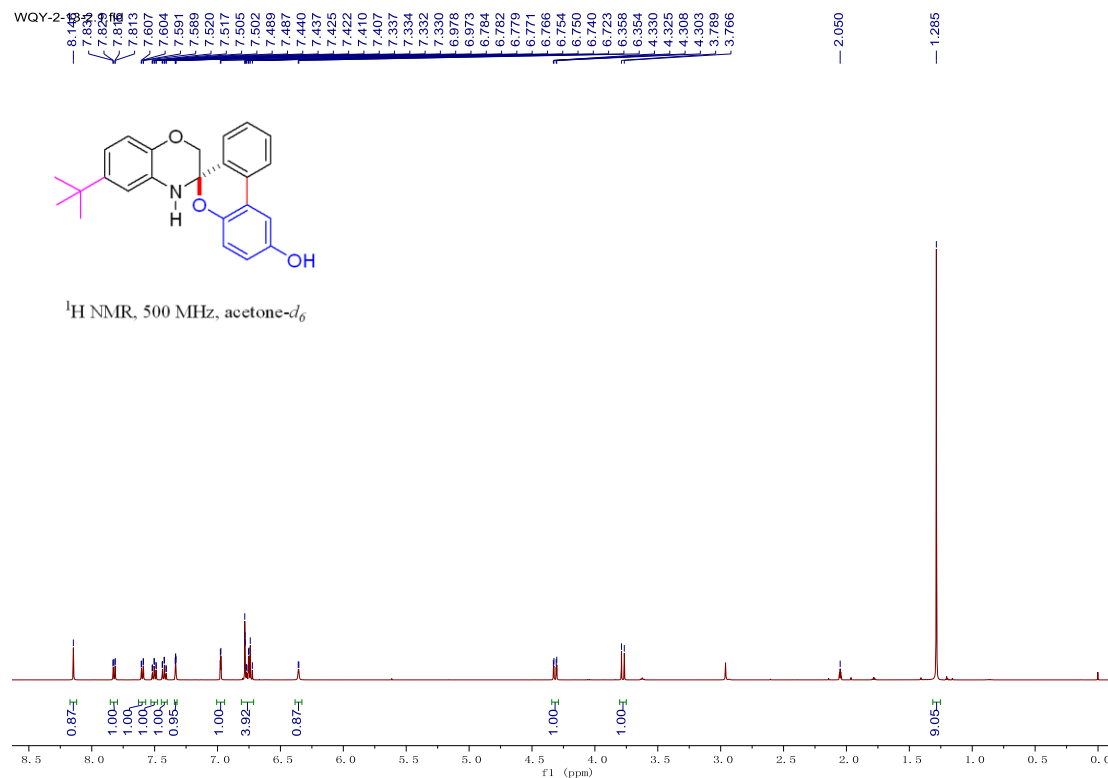

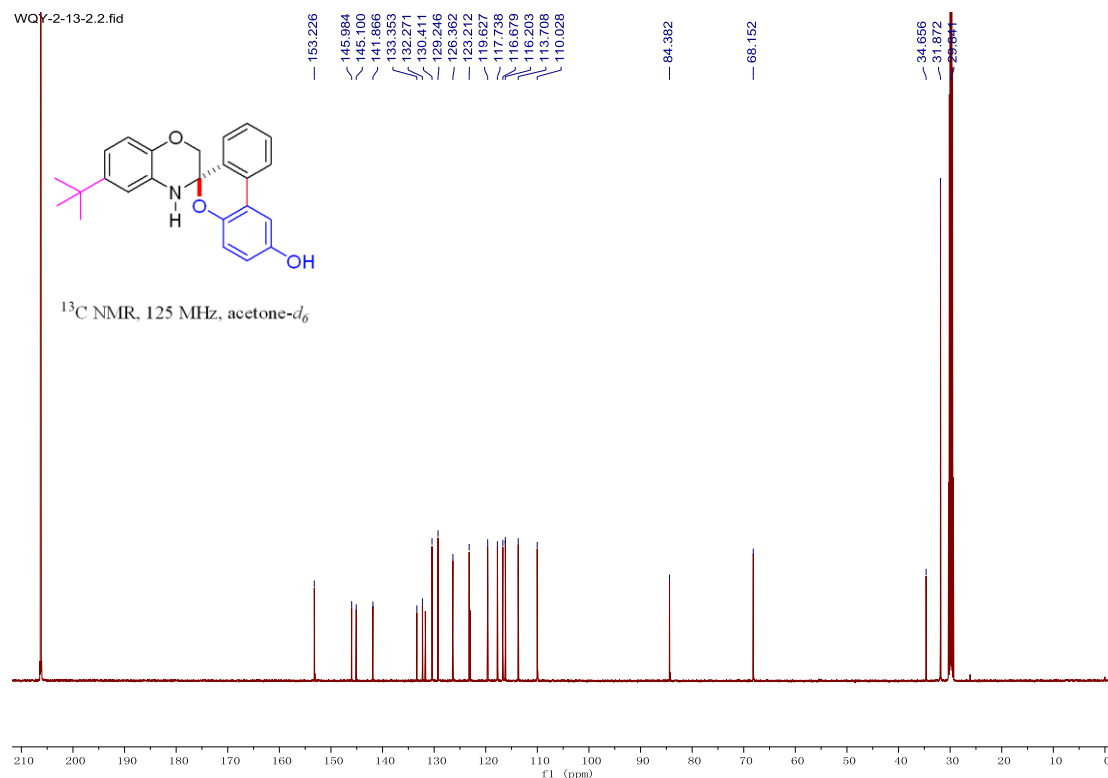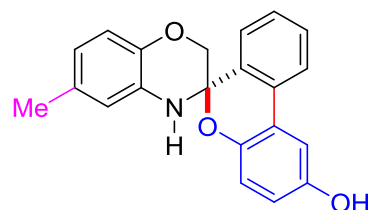

(±)-6-Methyl-2H,4H-spiro[benzo[*b*][1,4]oxazine-3,6'-benzo[*c*]chromen]-2'-ol

Compound **3c**: a white solid. Column chromatography, eluent: Petroleum/EtOAc = 5/1,  $R_f$  = 0.2, 30.7 mg, 93% yield. m.p. 85-87 °C.

**<sup>1</sup>H NMR** (500 MHz, DMSO-*d*<sub>6</sub>)  $\delta$  9.19 (s, 1H), 7.81 (d,  $J$  = 7.5 Hz, 1H), 7.53-7.49 (m, 2H), 7.45-7.41 (m, 1H), 7.34 (d,  $J$  = 2.0 Hz, 1H), 7.26 (d,  $J$  = 2.0 Hz, 1H), 6.75 (d,  $J$  = 8.5 Hz, 1H), 6.69 (dd,  $J$  = 8.5, 3.0 Hz, 1H), 6.67 (d,  $J$  = 8.0 Hz, 1H), 6.61 (d,  $J$  = 2.5 Hz, 1H), 6.46-6.44 (m, 1H), 4.20 (dd,  $J$  = 11.0, 2.0 Hz, 1H), 3.71 (d,  $J$  = 11.5 Hz, 1H), 2.18 (s, 3H).

**<sup>13</sup>C NMR** (125 MHz, DMSO-*d*<sub>6</sub>)  $\delta$  152.2, 144.2, 140.3, 131.94, 131.91, 130.4, 130.3, 129.7, 128.4, 125.6, 122.3, 121.6, 118.7, 118.6, 116.9, 115.7, 115.5, 109.2, 83.1, 67.0, 20.6.

**IR (KBr)**  $\nu$ (cm<sup>-1</sup>): 3250, 2921, 1617, 1492, 1311, 1217, 1051, 936, 855, 771 cm<sup>-1</sup>.



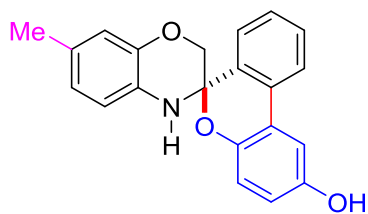

(±)-7-Methyl-2H,4H-spiro[benzo[*b*][1,4]oxazine-3,6'-benzo[*c*]chromen]-2'-ol

Compound **3d**: a yellow oil. Column chromatography, eluent: Petroleum/EtOAc = 5/1,  $R_f = 0.3$ , 27 mg, 82% yield.

$^1\text{H NMR}$  (500 MHz,  $\text{DMSO-}d_6$ )  $\delta$  9.19 (s, 1H), 7.82-7.80 (m, 1H), 7.53-7.50 (m, 2H), 7.43 (td,  $J = 7.5, 1.5$  Hz, 1H), 7.27 (d,  $J = 2.5$  Hz, 1H), 7.23 (d,  $J = 2.5$  Hz, 1H), 6.75 (d,  $J = 8.5$  Hz, 1H), 6.71-6.68 (m, 2H), 6.62-6.60 (m, 2H), 4.22 (dd,  $J = 11.5, 2.5$  Hz, 1H), 3.75 (d,  $J = 11.5$  Hz, 1H), 2.18 (s, 3H).

$^{13}\text{C NMR}$  (125 MHz,  $\text{DMSO-}d_6$ )  $\delta$  152.2, 144.2, 142.3, 132.0, 130.3, 129.7, 129.6, 128.4, 127.2, 125.6, 122.3, 121.9, 121.7, 118.5, 116.9, 116.3, 115.2, 109.2, 83.1, 67.1, 20.3.

**IR (KBr)**  $\nu(\text{cm}^{-1})$ : 3252, 2920, 1517, 1443, 1305, 1203, 1023, 945, 857, 770  $\text{cm}^{-1}$ .

**HRMS (ESI)** calcd. for  $[\text{C}_{21}\text{H}_{17}\text{NO}_3+\text{H}]^+$  requires 332.12812, found 332.12604  $[\text{M}+\text{H}]^+$ .

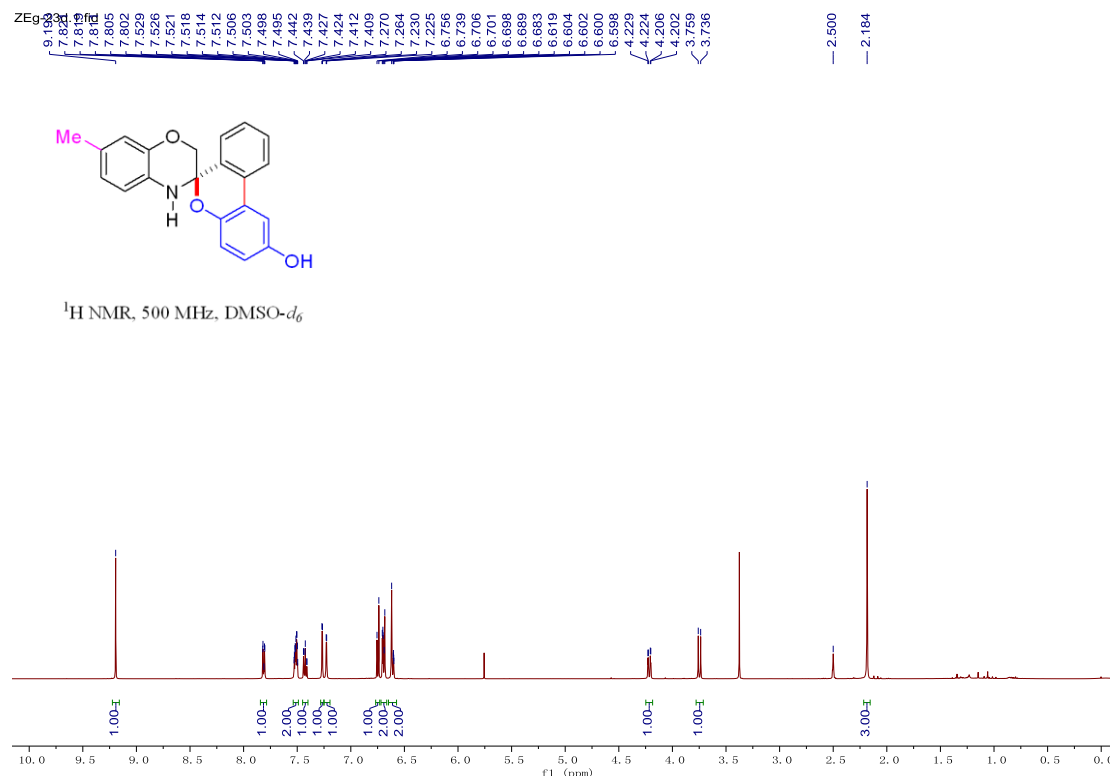



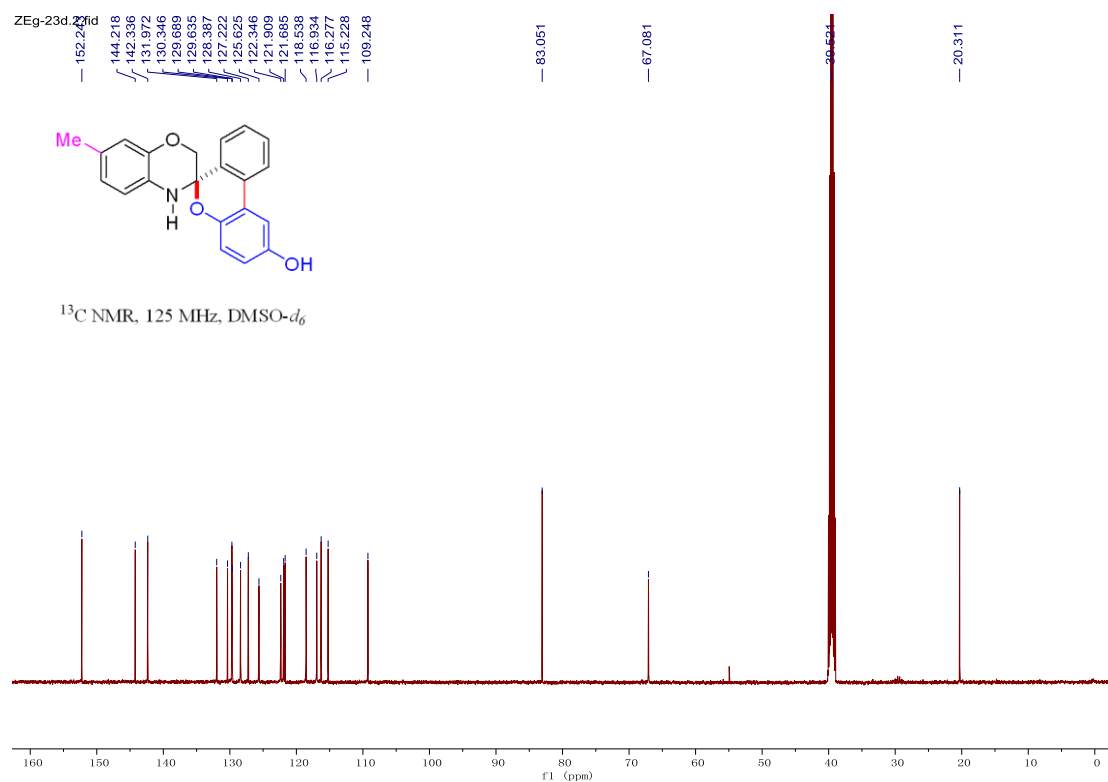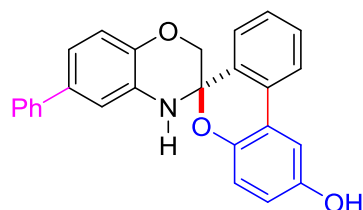

(±)-6-Phenyl-2*H*,4*H*-spiro[benzo[*b*][1,4]oxazine-3,6'-benzo[*c*]chromen]-2'-ol

Compound **3e**: a white solid. Column chromatography, eluent: Petroleum/EtOAc = 5/1,  $R_f$  = 0.2, 35 mg, 90% yield. m.p. 109-111 °C.

<sup>1</sup>H NMR (600 MHz, CDCl<sub>3</sub>, TMS)  $\delta$  7.68-7.66 (m, 1H), 7.52-7.51 (m, 3H), 7.47-7.43 (m, 1H), 7.41-7.36 (m, 3H), 7.31-7.28 (m, 1H), 7.20 (d,  $J$  = 1.2 Hz, 1H), 7.02 (dd,  $J$  = 8.4, 1.8 Hz, 1H), 6.98 (d,  $J$  = 7.8 Hz, 1H), 6.95-6.94 (m, 1H), 6.90 (d,  $J$  = 8.4 Hz, 1H), 6.72-6.69 (m, 1H), 4.98-4.90 (m, 2H), 4.41 (d,  $J$  = 11.4 Hz, 1H), 3.87 (d,  $J$  = 11.4 Hz, 1H).

<sup>13</sup>C NMR (150 MHz, CDCl<sub>3</sub>)  $\delta$  150.8, 145.6, 143.0, 141.1, 135.4, 132.0, 131.2, 130.6, 130.0, 128.9, 128.8, 127.0, 126.9, 125.3, 122.7, 122.3, 119.5, 119.2, 117.3, 117.0, 114.6, 109.6, 83.7, 67.9.

IR (KBr)  $\nu$ (cm<sup>-1</sup>): 3368, 1489, 1443, 1315, 1242, 1200, 1053, 945, 856, 763 cm<sup>-1</sup>.

HRMS (ESI) calcd. for  $[C_{26}H_{19}NO_3+H]^+$  requires 394.14377, found 394.14371  
 $[M+H]^+$ .

7.672  
7.670  
7.668  
7.666  
7.659  
7.657  
7.524  
7.521  
7.511  
7.509  
7.507  
7.485  
7.482  
7.459  
7.452  
7.449  
7.447  
7.439  
7.436  
7.434  
7.405  
7.402  
7.382  
7.382  
7.385  
7.382  
7.374  
7.374  
7.372  
7.370  
7.362  
7.359  
7.357  
7.309  
7.307  
7.304  
7.297  
7.294  
7.291  
7.284  
7.282  
7.280  
7.204  
7.202  
7.030  
7.027  
7.016  
7.013  
6.989  
6.976  
6.952  
6.949  
6.946  
6.944  
6.910  
6.896  
6.716  
6.713  
6.711  
6.708  
6.706  
6.698  
6.696  
6.693  
6.691  
6.687  
4.904  
4.420  
4.417  
4.401  
4.398  
3.883  
3.864  
0.000

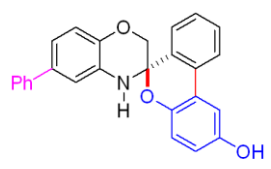

$^1H$  NMR, 600 MHz,  $CDCl_3$

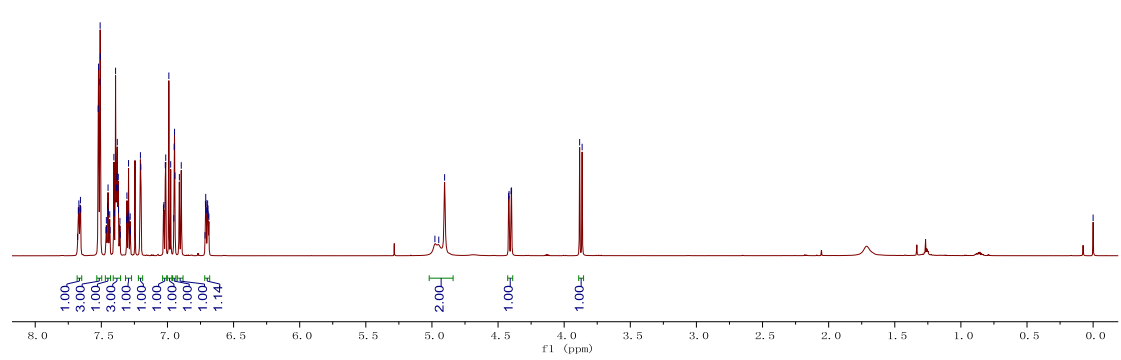

ZEH-60.2.fid  
 150.817  
 145.882  
 142.864  
 141.079  
 135.447  
 131.995  
 131.212  
 130.642  
 129.883  
 128.855  
 128.789  
 128.856  
 128.904  
 128.904  
 122.726  
 122.266  
 119.517  
 119.200  
 117.253  
 116.993  
 114.640  
 109.600  
 83.713  
 77.160  
 67.878

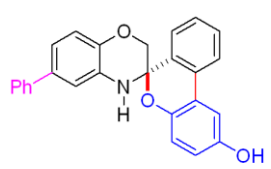

$^{13}C$  NMR, 150 MHz,  $CDCl_3$

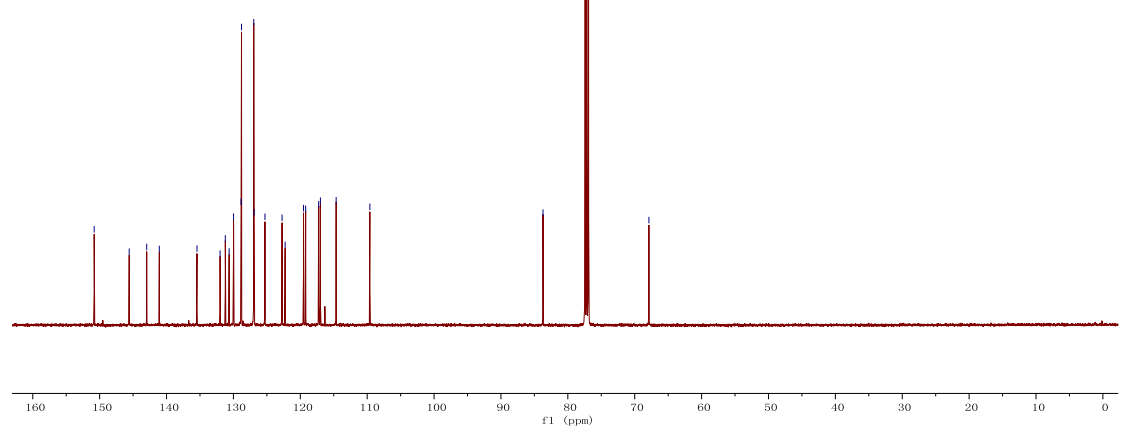

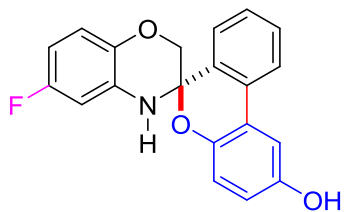

(±)-6-Fluoro-2*H*,4*H*-spiro[benzo[*b*][1,4]oxazine-3,6'-benzo[*c*]chromen]-2'-ol

Compound **3f**: a white solid. Column chromatography, eluent: Petroleum/EtOAc = 5/1,  $R_f = 0.3$ , 25.8 mg, 77% yield. m.p. 184-186 °C.

$^1\text{H NMR}$  (500 MHz, acetone- $d_6$ )  $\delta$  8.18 (s, 1H), 7.83 (d,  $J = 7.5$  Hz, 1H), 7.57 (dd,  $J = 7.5, 1.5$  Hz, 1H), 7.51 (td,  $J = 7.5, 1.5$  Hz, 1H), 7.43 (td,  $J = 7.5, 1.5$  Hz, 1H), 7.34 (t,  $J = 1.5$  Hz, 1H), 6.82-6.77 (m, 4H), 6.68 (dd,  $J = 10.0, 3.0$  Hz, 1H), 6.45 (td,  $J = 8.5, 3.0$  Hz, 1H), 4.35 (dd,  $J = 11.0, 2.0$  Hz, 1H), 3.82 (d,  $J = 11.0$  Hz, 1H).

$^{13}\text{C NMR}$  (125 MHz, acetone- $d_6$ )  $\delta$  158.8 (d,  $J = 233.5$  Hz), 153.4, 145.6, 140.2 (d,  $J = 2.3$  Hz), 134.2 (d,  $J = 11.1$  Hz), 132.8, 131.6, 130.6, 129.3, 126.2, 123.3, 122.9, 119.7, 117.8, 117.3 (d,  $J = 9.6$  Hz), 110.1, 105.2 (d,  $J = 23.4$  Hz), 102.8 (d,  $J = 27.3$  Hz), 83.8, 68.2.

$^{19}\text{F NMR}$  (470 MHz, acetone- $d_6$ )  $\delta$  (-123.57)-(-123.62) (m).

**IR (KBr)**  $\nu$  (cm $^{-1}$ ): 3357, 1626, 1492, 1444, 1312, 1208, 1052, 986, 855, 770 cm $^{-1}$ .

**HRMS** (ESI) calcd. for  $[\text{C}_{20}\text{H}_{14}\text{FNO}_3 + \text{H}]^+$  requires 336.10305, found 336.10114  $[\text{M} + \text{H}]^+$ .



ZEh-47.1.fid

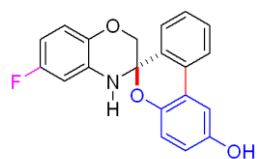

$^{19}\text{F}$  NMR, 470 MHz, acetone- $d_6$

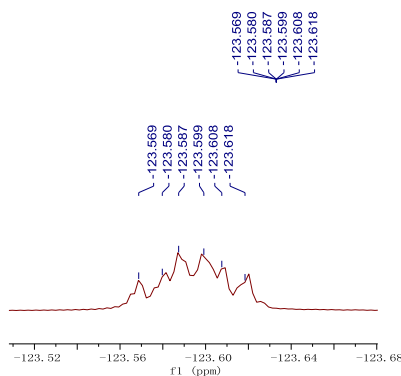

20 10 0 -10 -20 -30 -40 -50 -60 -70 -80 -90 -100 -110 -120 -130 -140 -150 -160 -170 -180 -190 -200 -210 -2

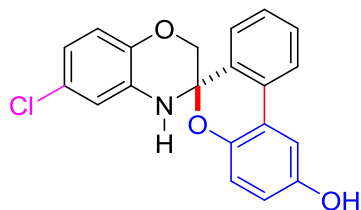

(±)-6-Chloro-2H,4H-spiro[benzo[*b*][1,4]oxazine-3,6'-benzo[*c*]chromen]-2'-ol

Compound **3g**: a white solid. Column chromatography, eluent: Petroleum/EtOAc = 5/1,  $R_f$  = 0.3, 24.7 mg, 70% yield. m.p. 177-180 °C.

$^1\text{H}$  NMR (500 MHz, acetone- $d_6$ )  $\delta$  8.19-8.18 (m, 1H), 7.84 (d,  $J$  = 7.5 Hz, 1H), 7.57 (d,  $J$  = 8.0 Hz, 1H), 7.54-7.50 (m, 1H), 7.45-7.41 (m, 1H), 7.34-7.33 (m, 1H), 6.93 (d,  $J$  = 2.5 Hz, 1H), 6.82 (d,  $J$  = 9.0 Hz, 1H), 6.79-6.77 (m, 3H), 6.71 (dd,  $J$  = 8.5, 2.5 Hz, 1H), 4.37 (dd,  $J$  = 11.0, 2.0 Hz, 1H), 3.86 (d,  $J$  = 11.0 Hz, 1H).

$^{13}\text{C}$  NMR (125 MHz, acetone- $d_6$ )  $\delta$  153.4, 145.6, 142.9, 134.5, 132.7, 131.6, 130.6, 129.3, 126.6, 126.2, 123.3, 122.9, 119.6, 119.2, 118.0, 117.8, 115.8, 110.1, 83.7, 68.3.

IR (KBr)  $\nu$ ( $\text{cm}^{-1}$ ): 3355, 2923, 1609, 1496, 1306, 1206, 1051, 944, 855, 770  $\text{cm}^{-1}$ .

HRMS (ESI) calcd. for  $[\text{C}_{20}\text{H}_{14}\text{ClNO}_3+\text{H}]^+$  requires 352.07350, found 352.07132  $[\text{M}+\text{H}]^+$ .



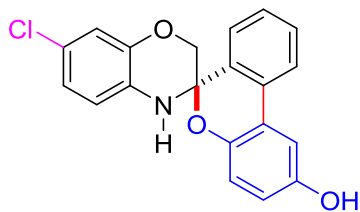

(±)-7-Chloro-2H,4H-spiro[benzo[*b*][1,4]oxazine-3,6'-benzo[*c*]chromen]-2'-ol

Compound **3h**: a white solid. Column chromatography, eluent: Petroleum/EtOAc = 4/1,  $R_f = 0.25$ , 26.4 mg, 75% yield. m.p. 186-188 °C.

$^1\text{H NMR}$  (500 MHz, acetone- $d_6$ )  $\delta$  8.24-8.22 (m, 1H), 7.83 (d,  $J = 7.5$  Hz, 1H), 7.57 (d,  $J = 8.0$  Hz, 1H), 7.53-7.49 (m, 1H), 7.44-7.40 (m, 1H), 7.33 (s, 1H), 6.91-6.83 (m, 3H), 6.79 (s, 2H), 6.67-6.66 (m, 1H), 4.37 (dd,  $J = 11.0, 2.0$  Hz, 1H), 3.88 (dd,  $J = 11.5, 1.5$  Hz, 1H).

$^{13}\text{C NMR}$  (125 MHz, acetone- $d_6$ )  $\delta$  153.4, 145.6, 144.7, 132.7, 132.2, 131.6, 130.6, 129.3, 126.2, 123.6, 123.3, 122.9, 122.1, 119.6, 117.8, 117.3, 116.7, 110.1, 83.7, 68.3.

**IR (KBr)**  $\nu(\text{cm}^{-1})$ : 3362, 2923, 1593, 1495, 1303, 1198, 1052, 943, 855, 769  $\text{cm}^{-1}$ .

**HRMS (ESI)** calcd. for  $[\text{C}_{20}\text{H}_{14}\text{ClNO}_3+\text{H}]^+$  requires 352.07350, found 352.07205  $[\text{M}+\text{H}]^+$ .

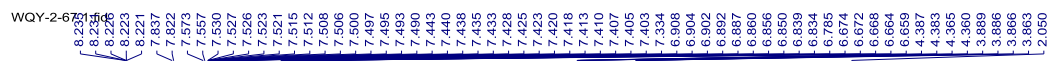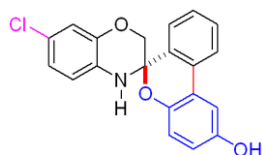

$^1\text{H NMR}$ , 500 MHz, acetone- $d_6$

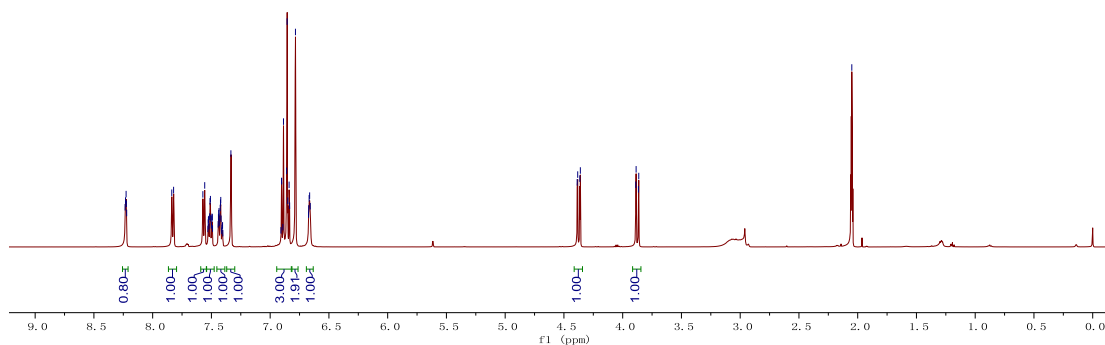

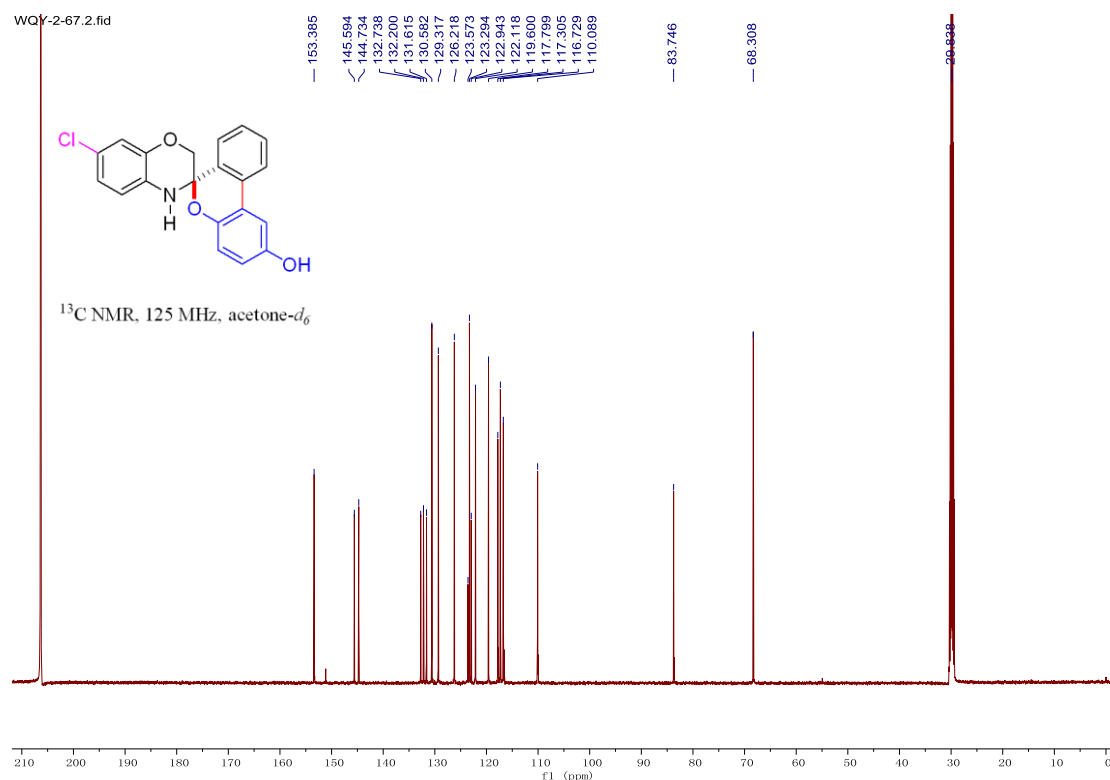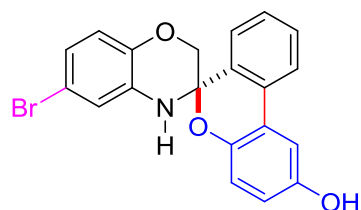

(±)-6-Bromo-2*H*,4*H*-spiro[benzo[*b*][1,4]oxazine-3,6'-benzo[*c*]chromen]-2'-ol

Compound **3i**: a white solid. Column chromatography, eluent: Petroleum/EtOAc = 4/1,  $R_f$  = 0.25, 36.3 mg, 92% yield. m.p. 200-206 °C.

<sup>1</sup>H NMR (500 MHz, acetone-*d*<sub>6</sub>)  $\delta$  8.21-8.20 (m, 1H), 7.84 (d,  $J$  = 8.0 Hz, 1H), 7.57 (d,  $J$  = 7.5 Hz, 1H), 7.54-7.50 (m, 1H), 7.45-7.41 (m, 1H), 7.33 (t,  $J$  = 1.5 Hz, 1H), 7.07 (d,  $J$  = 2.5 Hz, 1H), 6.85 (dd,  $J$  = 8.5, 2.5 Hz, 1H), 6.80-6.76 (m, 4H), 4.37 (dd,  $J$  = 11.0, 2.0 Hz, 1H), 3.86 (dd,  $J$  = 11.0, 1.0 Hz, 1H).

<sup>13</sup>C NMR (125 MHz, acetone-*d*<sub>6</sub>)  $\delta$  153.4, 145.5, 143.4, 134.9, 132.6, 131.6, 130.6, 129.3, 126.2, 123.3, 122.9, 122.2, 119.6, 118.7, 118.4, 117.8, 113.9, 110.1, 83.6, 68.3.

IR (KBr)  $\nu$ (cm<sup>-1</sup>): 3354, 2922, 1606, 1493, 1306, 1205, 1052, 944, 854, 751 cm<sup>-1</sup>.

HRMS (ESI) calcd. for [C<sub>20</sub>H<sub>14</sub>BrNO<sub>3</sub>+H]<sup>+</sup> requires 396.02298, found 396.02310 [M+H]<sup>+</sup>.



WQY-2-43.1.f1  
 8.214  
 8.209  
 8.204  
 8.201  
 7.844  
 7.828  
 7.575  
 7.560  
 7.536  
 7.533  
 7.530  
 7.524  
 7.516  
 7.511  
 7.508  
 7.506  
 7.503  
 7.500  
 7.452  
 7.450  
 7.447  
 7.444  
 7.435  
 7.432  
 7.429  
 7.422  
 7.420  
 7.417  
 7.414  
 7.336  
 7.333  
 7.330  
 7.071  
 7.066  
 6.857  
 6.852  
 6.840  
 6.635  
 6.593  
 6.586  
 6.786  
 6.776  
 6.762  
 4.388  
 4.384  
 4.366  
 4.361  
 3.875  
 3.874  
 3.853  
 3.851  
 2.050

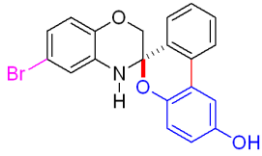

<sup>1</sup>H NMR, 500 MHz, acetone-*d*<sub>6</sub>

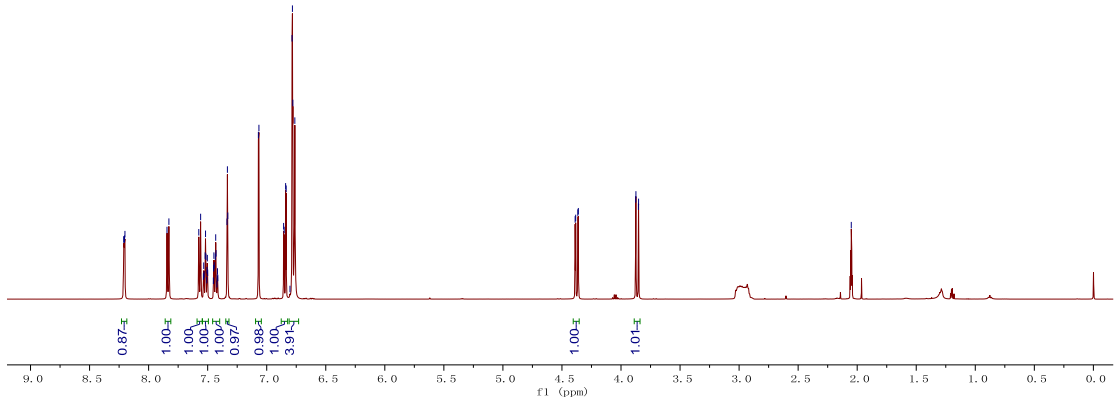

WQY-2-43.2.fid

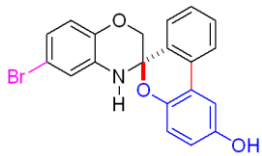

<sup>13</sup>C NMR, 125 MHz, acetone-*d*<sub>6</sub>

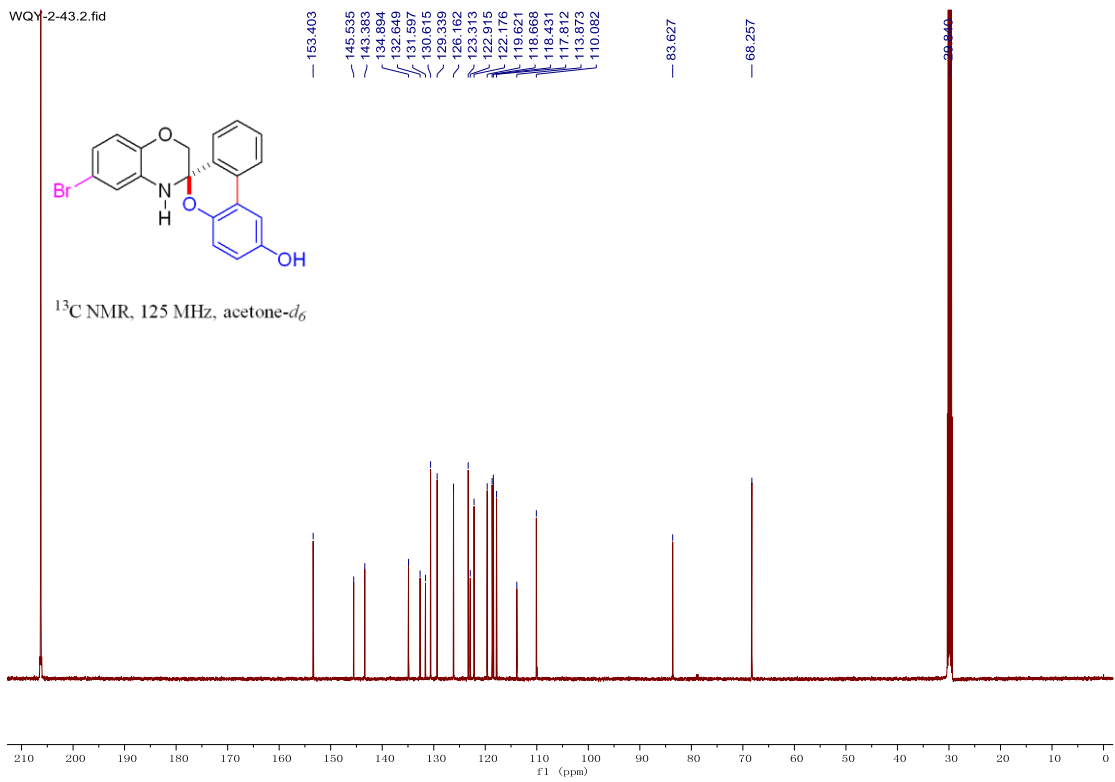

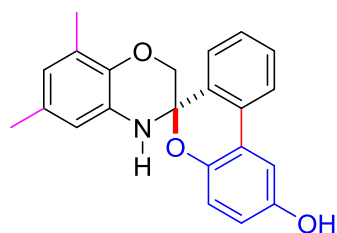

(±)-6,8-Dimethyl-2*H*,4*H*-spiro[benzo[*b*][1,4]oxazine-3,6'-benzo[*c*]chromen]-2'-ol

Compound **3j**: a yellow solid. Column chromatography, eluent: Petroleum/EtOAc = 5/1,  $R_f = 0.2$ , 18.5 mg, 54% yield. m.p. 151-153 °C.

$^1\text{H NMR}$  (500 MHz, acetone- $d_6$ )  $\delta$  8.14 (s, 1H), 7.82 (dd,  $J = 8.0, 1.0$  Hz, 1H), 7.56 (dd,  $J = 7.5, 1.5$  Hz, 1H), 7.50 (td,  $J = 7.5, 1.5$  Hz, 1H), 7.41 (td,  $J = 7.5, 1.5$  Hz, 1H), 7.33 (t,  $J = 1.5$  Hz, 1H), 6.77 (d,  $J = 1.5$  Hz, 2H), 6.55 (d,  $J = 2.0$  Hz, 1H), 6.40-6.39 (m, 1H), 6.27 (d,  $J = 2.5$  Hz, 1H), 4.37 (dd,  $J = 11.0, 2.0$  Hz, 1H), 3.78 (d,  $J = 11.0$  Hz, 1H), 2.17 (s, 3H), 2.12 (s, 3H).

$^{13}\text{C NMR}$  (125 MHz, acetone- $d_6$ )  $\delta$  153.2, 146.0, 140.0, 133.4, 132.3, 131.7, 130.7, 130.4, 129.2, 126.3, 125.4, 123.2, 123.0, 122.1, 119.6, 117.7, 114.8, 110.0, 84.3, 68.3, 20.9, 15.7.

**IR** (KBr)  $\nu(\text{cm}^{-1})$ : 3359, 2919, 1609, 1444, 1208, 1310, 1197, 940, 864, 749  $\text{cm}^{-1}$ .

**HRMS** (ESI) calcd. for  $[\text{C}_{22}\text{H}_{19}\text{NO}_3+\text{H}]^+$  requires 346.14377, found 346.14166  $[\text{M}+\text{H}]^+$ .

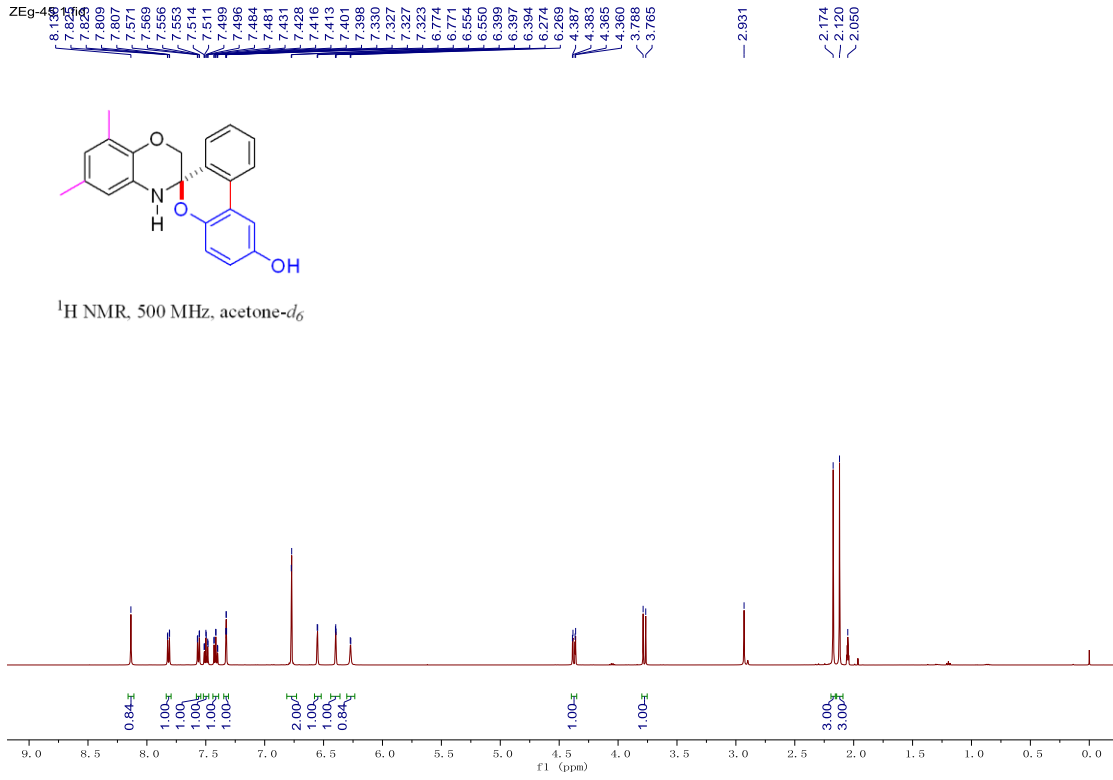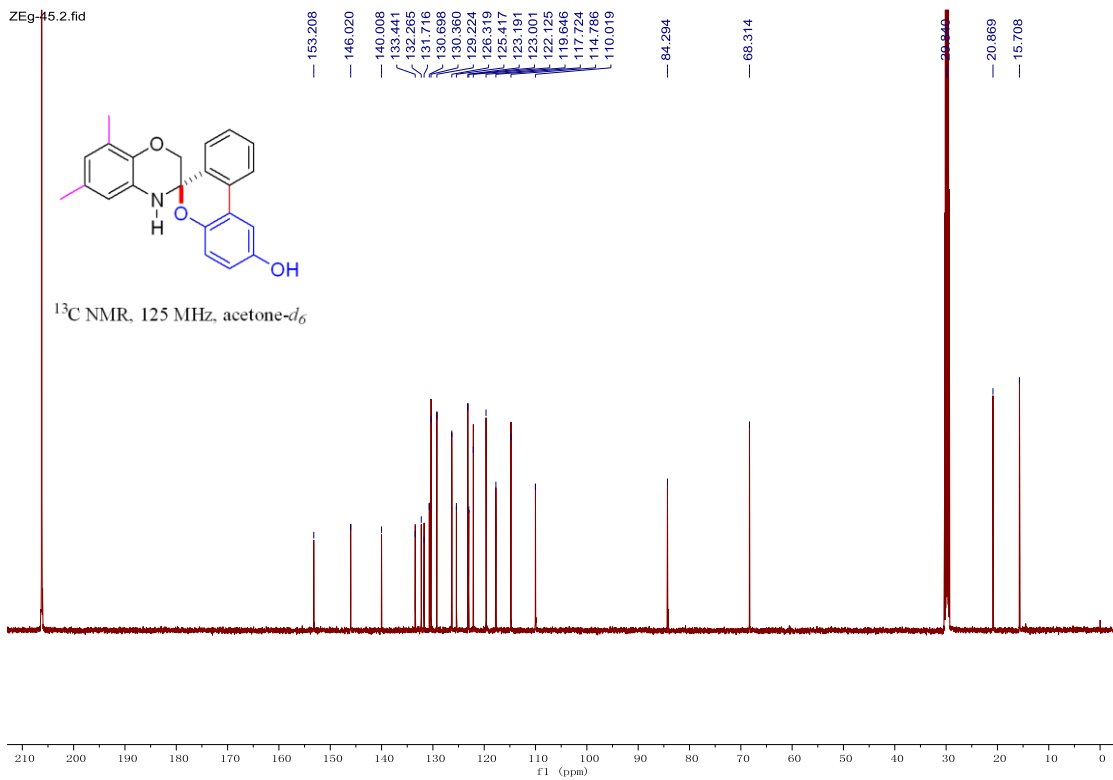

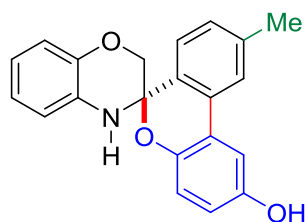

(±)-9'-Methyl-2*H*,4*H*-spiro[benzo[*b*][1,4]oxazine-3,6'-benzo[*c*]chromen]-2'-ol

Compound **3k**: a white solid. Column chromatography, eluent: Petroleum/EtOAc = 5/1,  $R_f = 0.3$ , 29.8 mg, 90% yield. m.p. 173-175 °C.

$^1\text{H NMR}$  (500 MHz, acetone- $d_6$ )  $\delta$  8.10 (s, 1H), 7.65 (s, 1H), 7.45 (d,  $J = 8.0$  Hz, 1H), 7.33 (t,  $J = 1.5$  Hz, 1H), 7.25-7.23 (m, 1H), 6.89 (dd,  $J = 7.5, 1.5$  Hz, 1H), 6.83-6.80 (m, 2H), 6.76 (d,  $J = 1.5$  Hz, 2H), 6.72-6.67 (m, 1H), 6.42 (s, 1H), 4.31 (dd,  $J = 11.0, 2.0$  Hz, 1H), 3.79 (d,  $J = 11.0$  Hz, 1H), 2.42 (s, 3H).

$^{13}\text{C NMR}$  (125 MHz, acetone- $d_6$ )  $\delta$  153.2, 146.0, 144.1, 140.2, 133.1, 131.5, 130.5, 129.9, 126.3, 123.7, 123.0, 122.3, 119.7, 119.5, 117.6, 116.8, 116.5, 110.0, 84.1, 68.3, 21.4.

**IR (KBr)**  $\nu(\text{cm}^{-1})$ : 3363, 2922, 1612, 1501, 1312, 1209, 1040, 938, 838, 742  $\text{cm}^{-1}$ .

**HRMS (ESI)** calcd. for  $[\text{C}_{21}\text{H}_{17}\text{NO}_3+\text{H}]^+$  requires 332.12812, found 332.12625  $[\text{M}+\text{H}]^+$ .

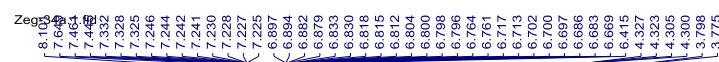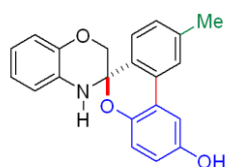

$^1\text{H NMR}$ , 500 MHz, acetone- $d_6$

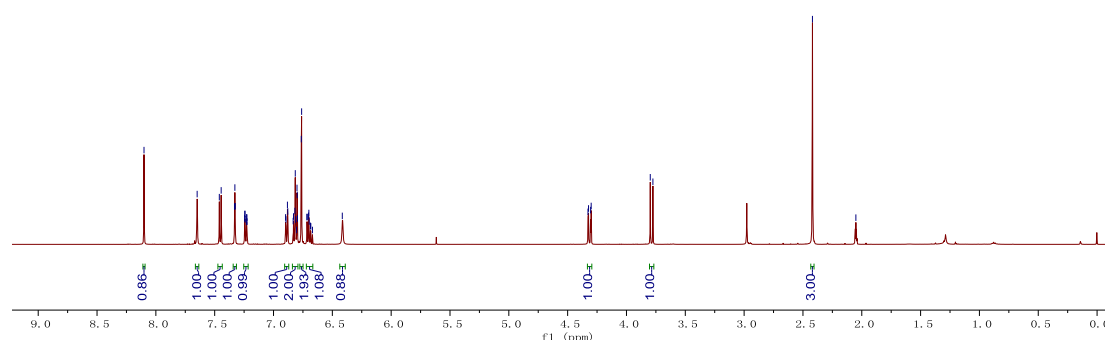

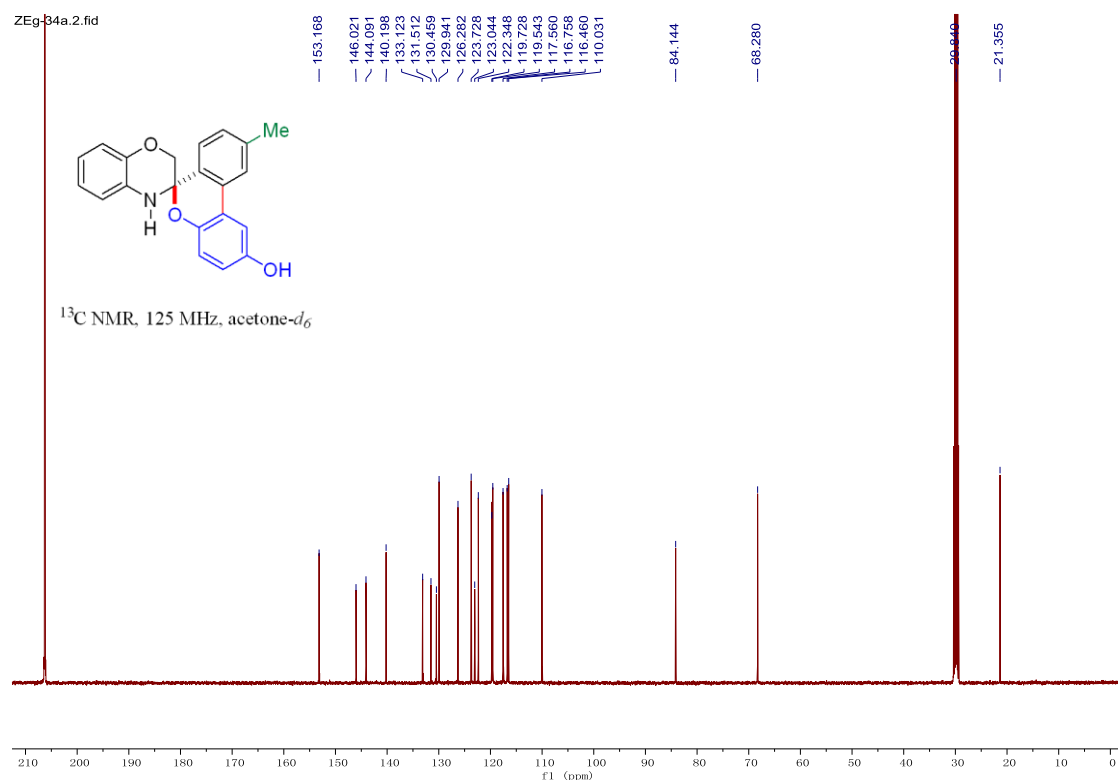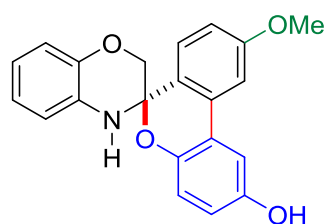

(±)-9'-Methoxy-2*H*,4*H*-spiro[benzo[*b*][1,4]oxazine-3,6'-benzo[*c*]chromen]-2'-ol

Compound **3l**: a white solid. Column chromatography, eluent: Petroleum/EtOAc = 4/1,  $R_f = 0.25$ , 19.7 mg, 57% yield. m.p. 188-190 °C.

<sup>1</sup>H NMR (500 MHz, acetone-*d*<sub>6</sub>)  $\delta$  8.13 (s, 1H), 7.49 (d,  $J = 9.0$  Hz, 1H), 7.33-7.32 (m, 2H), 6.98 (dd,  $J = 8.5, 2.5$  Hz, 1H), 6.89 (dd,  $J = 7.5, 1.5$  Hz, 1H), 6.83-6.75 (m, 4H), 6.72-6.67 (m, 1H), 6.41 (s, 1H), 4.30 (dd,  $J = 11.0, 2.0$  Hz, 1H), 3.91 (s, 3H), 3.77 (d,  $J = 11.0$  Hz, 1H).

<sup>13</sup>C NMR (125 MHz, acetone-*d*<sub>6</sub>)  $\delta$  161.7, 153.2, 146.2, 144.1, 133.2, 133.1, 127.9, 125.6, 122.9, 122.3, 119.7, 119.6, 117.8, 116.8, 116.5, 114.9, 110.2, 108.2, 84.2, 68.4, 55.8.

IR (KBr)  $\nu$ (cm<sup>-1</sup>): 3353, 2926, 1611, 1053, 1312, 1214, 1060, 938, 859, 746 cm<sup>-1</sup>.

HRMS (ESI) calcd. for  $[C_{21}H_{17}NO_4+H]^+$  requires 348.12303, found 348.12288

$[M+H]^+$ .

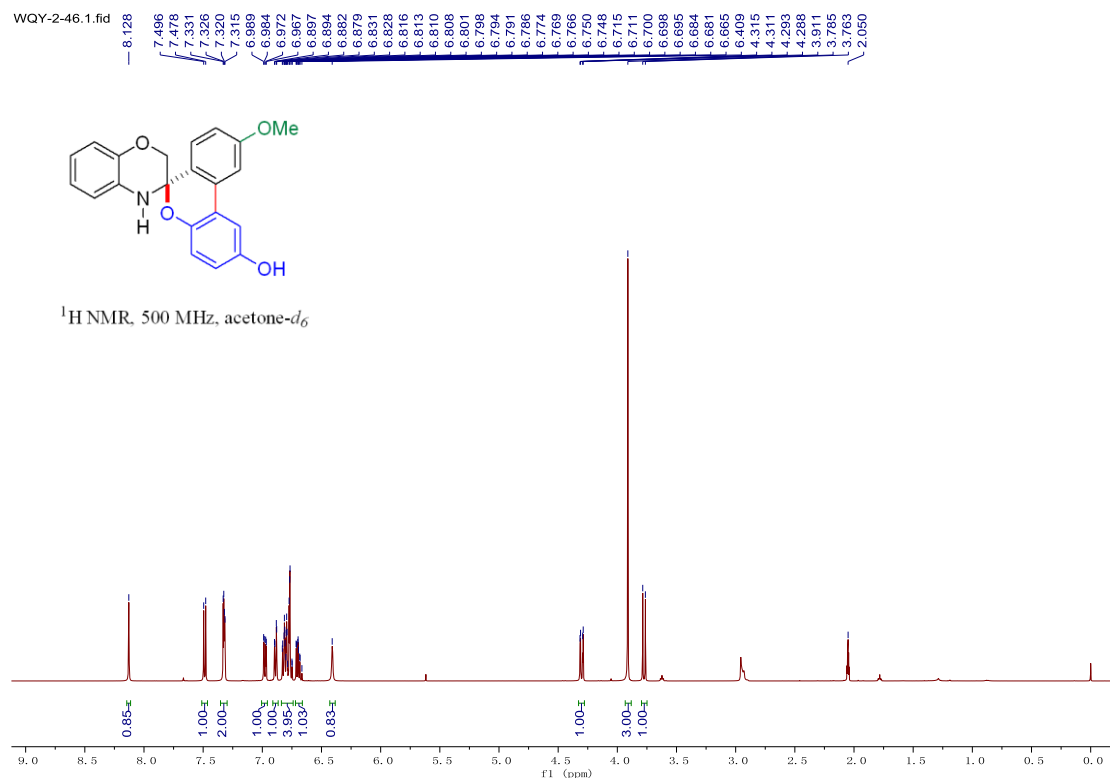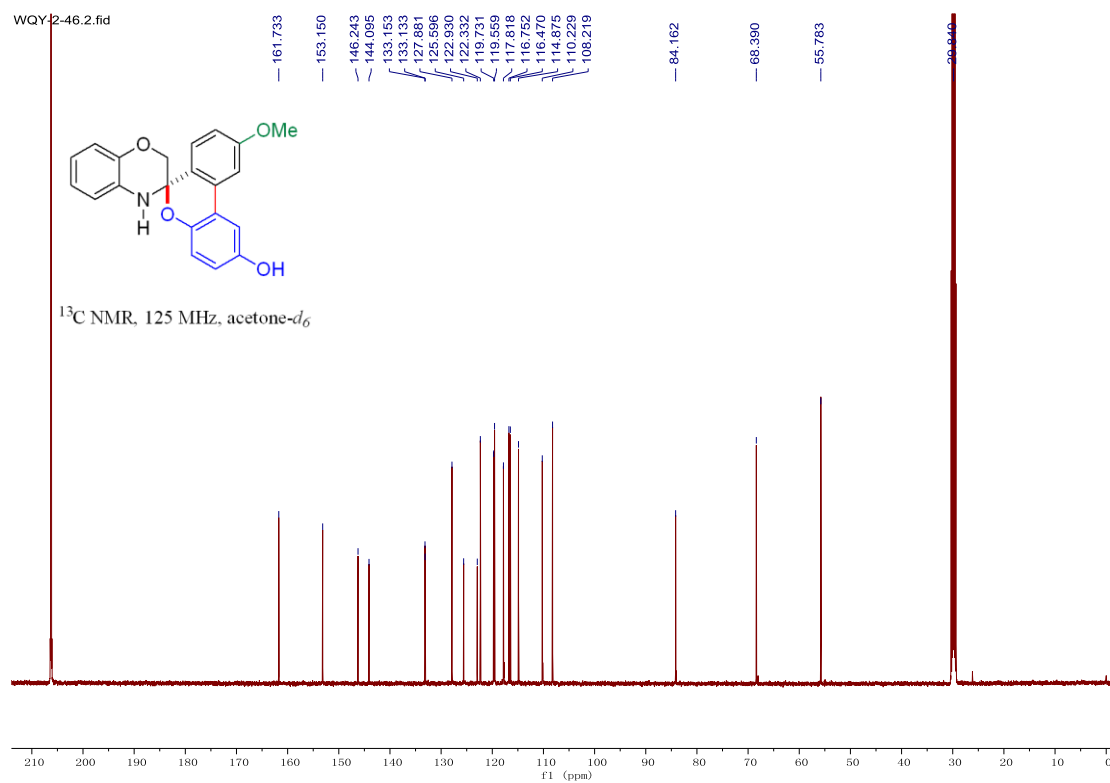

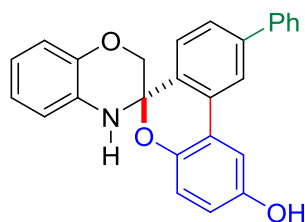

(±)-9'-Phenyl-2H,4H-spiro[benzo[*b*][1,4]oxazine-3,6'-benzo[*c*]chromen]-2'-ol

Compound **3m**: a white solid. Column chromatography, eluent: Petroleum/EtOAc = 5/1,  $R_f = 0.3$ , 23 mg, 60% yield. m.p. 85-87 °C.

$^1\text{H NMR}$  (500 MHz, acetone- $d_6$ )  $\delta$  8.14 (s, 1H), 8.08 (d,  $J = 2.0$  Hz, 1H), 7.80-7.78 (m, 2H), 7.72-7.69 (m, 1H), 7.67-7.65 (m, 1H), 7.53-7.49 (m, 3H), 7.44-7.40 (m, 1H), 6.92 (dd,  $J = 8.0, 1.5$  Hz, 1H), 6.85-6.79 (m, 4H), 6.74-6.71 (m, 1H), 6.52 (s, 1H), 4.39 (dd,  $J = 11.5, 2.5$  Hz, 1H), 3.87 (d,  $J = 11.0$  Hz, 1H).

$^{13}\text{C NMR}$  (125 MHz, acetone- $d_6$ )  $\delta$  153.3, 146.1, 144.1, 143.1, 141.1, 133.0, 132.2, 129.8, 128.7, 127.9, 127.8, 127.0, 123.0, 122.4, 121.7, 119.8, 119.6, 117.9, 116.8, 116.5, 110.3, 84.2, 68.2.

**IR (KBr)**  $\nu(\text{cm}^{-1})$ : 3358, 2923, 1611, 1500, 1311, 1212, 1061, 943, 857, 744  $\text{cm}^{-1}$ .

**HRMS (ESI)** calcd. for  $[\text{C}_{26}\text{H}_{19}\text{NO}_3+\text{H}]^+$  requires 394.14377, found 394.14139  $[\text{M}+\text{H}]^+$ .

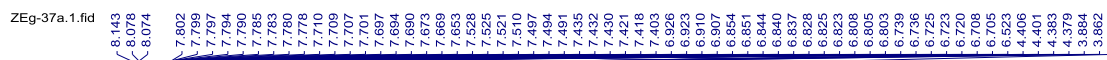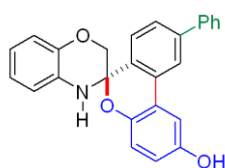

$^1\text{H NMR}$ , 500 MHz, acetone- $d_6$

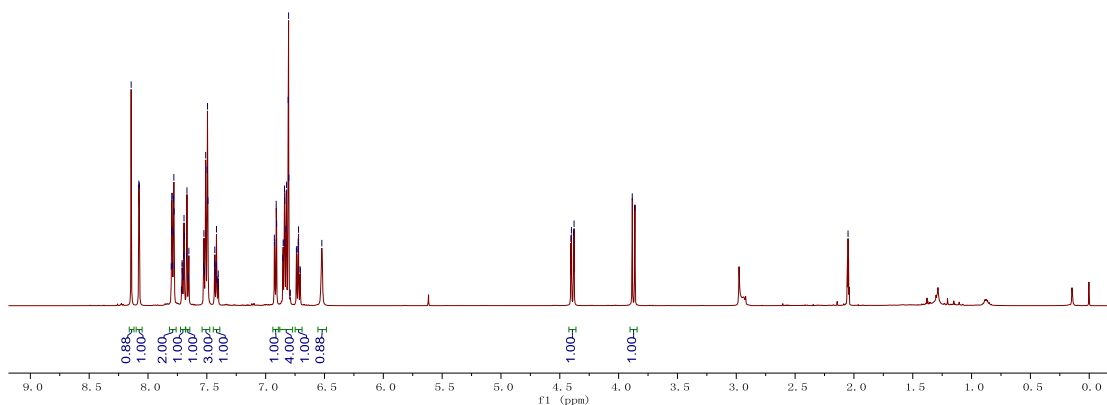

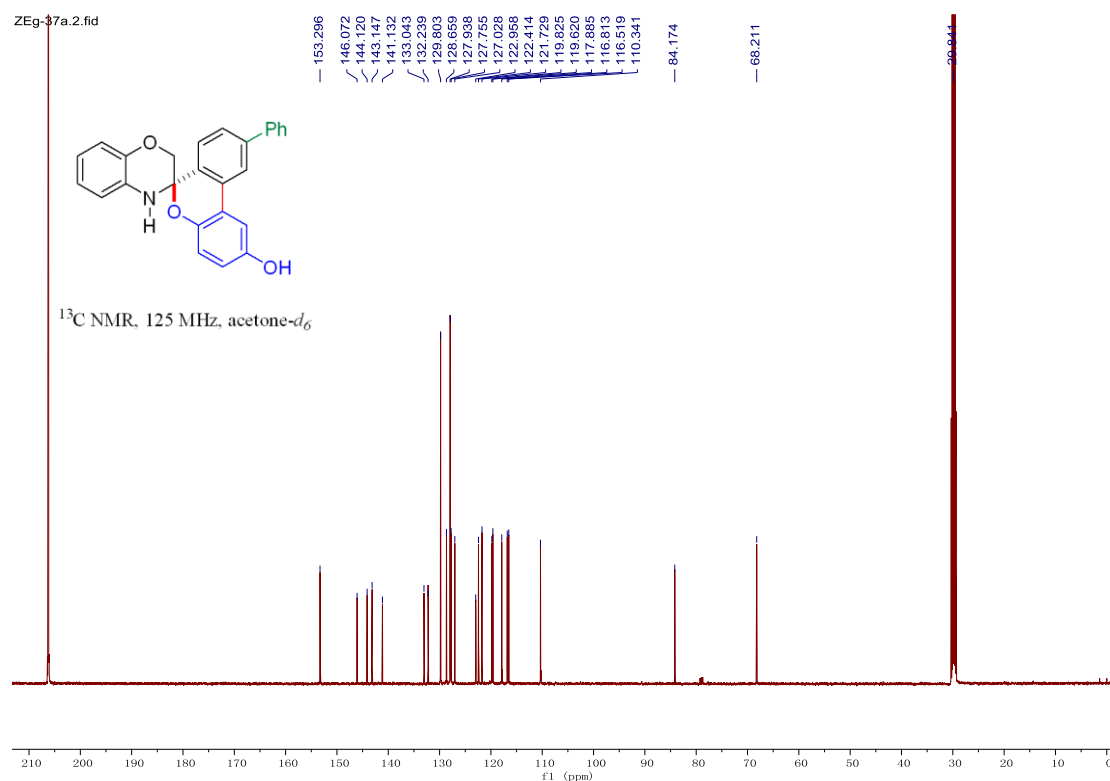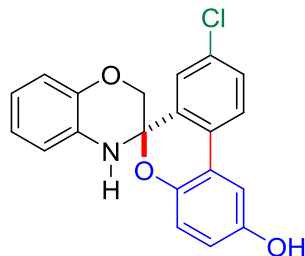

(±)-9'-Chloro-2*H*,4*H*-spiro[benzo[*b*][1,4]oxazine-3,6'-benzo[*c*]chromen]-2'-ol

Compound **3n**: a colorless oil. Column chromatography, eluent: Petroleum/EtOAc = 5/1,  $R_f = 0.3$ , 23 mg, 66% yield.

<sup>1</sup>H NMR (500 MHz, DMSO-*d*<sub>6</sub>)  $\delta$  9.26 (s, 1H), 7.86 (d,  $J = 8.5$  Hz, 1H), 7.58 (dd,  $J = 8.5, 2.5$  Hz, 1H), 7.53 (d,  $J = 2.0$  Hz, 1H), 7.49 (d,  $J = 2.5$  Hz, 1H), 7.26 (d,  $J = 2.5$  Hz, 1H), 6.83-6.75 (m, 4H), 6.72 (dd,  $J = 8.5, 3.0$  Hz, 1H), 6.68-6.64 (m, 1H), 4.23 (dd,  $J = 11.5, 2.5$  Hz, 1H), 3.82 (d,  $J = 11.5$  Hz, 1H).

<sup>13</sup>C NMR (125 MHz, DMSO-*d*<sub>6</sub>)  $\delta$  152.4, 144.0, 142.4, 133.7, 132.9, 132.0, 129.6, 129.4, 125.6, 124.5, 121.6, 120.8, 118.7, 118.5, 117.4, 115.8, 115.3, 109.4, 82.7, 66.6.

IR (KBr)  $\nu$  (cm<sup>-1</sup>): 3246, 2924, 1611, 1489, 1313, 1209, 1047, 947, 857, 785 cm<sup>-1</sup>.



HRMS (ESI) calcd. for  $[C_{20}H_{14}ClNO_3+H]^+$  requires 352.07350, found 352.07178

$[M+H]^+$

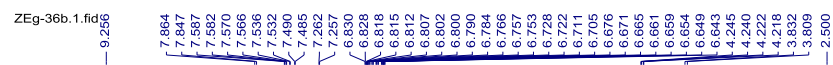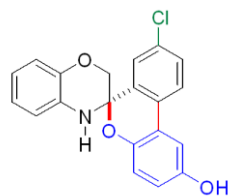

$^1H$  NMR, 500 MHz,  $DMSO-d_6$

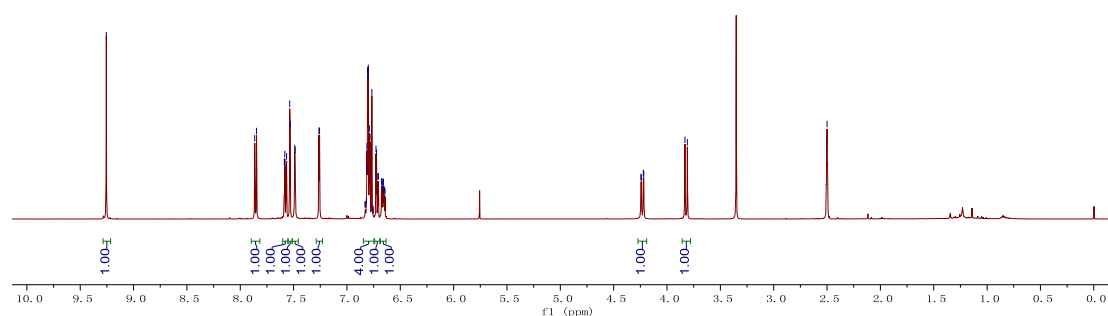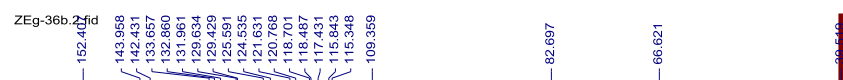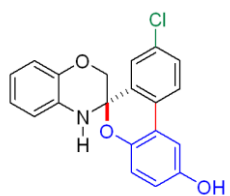

$^{13}C$  NMR, 125 MHz,  $DMSO-d_6$

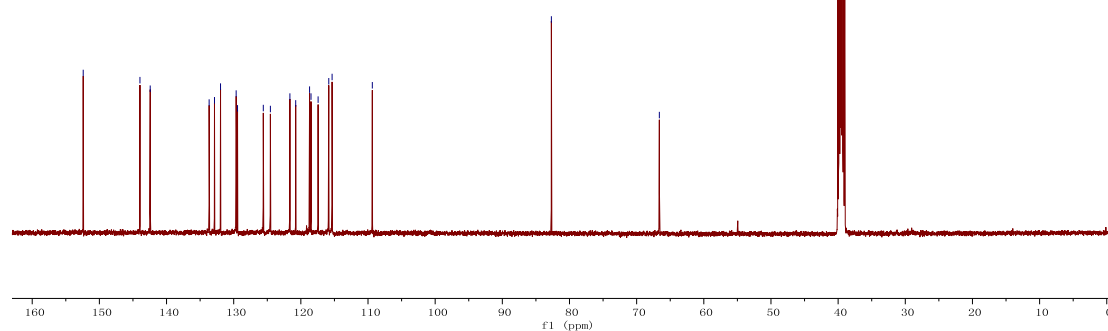

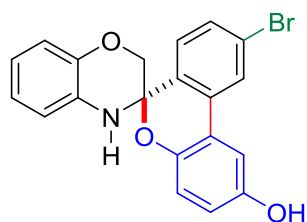

(±)-9'-Bromo-2H,4H-spiro[benzo[*b*][1,4]oxazine-3,6'-benzo[*c*]chromen]-2'--ol

Compound **3o**: a white solid. Column chromatography, eluent: Petroleum/EtOAc = 4/1,  $R_f = 0.25$ , 17 mg, 43% yield. m.p. 199-202 °C.

$^1\text{H NMR}$  (500 MHz, acetone- $d_6$ )  $\delta$  8.31-8.29 (m, 1H), 7.98 (t,  $J = 2.0$  Hz, 1H), 7.61-7.57 (m, 1H), 7.54-7.51 (m, 1H), 7.34 (d,  $J = 3.0$  Hz, 1H), 6.89-6.87 (m, 1H), 6.84-6.78 (m, 4H), 6.73-6.70 (m, 1H), 6.54 (s, 1H), 4.36 (dd,  $J = 11.5, 2.5$  Hz, 1H), 3.82 (dd,  $J = 11.5, 1.5$  Hz, 1H).

$^{13}\text{C NMR}$  (125 MHz, acetone- $d_6$ )  $\delta$  153.4, 146.1, 144.1, 134.1, 132.8, 132.3, 131.9, 128.7, 126.0, 124.4, 122.5, 121.7, 120.0, 119.8, 118.7, 116.8, 116.6, 110.2, 84.1, 67.9.

**IR (KBr)**  $\nu(\text{cm}^{-1})$ : 3350, 2922, 1611, 1433, 1311, 1209, 1045, 976, 857, 745  $\text{cm}^{-1}$ .

**HRMS (ESI)** calcd. for  $[\text{C}_{20}\text{H}_{14}\text{BrNO}_3+\text{H}]^+$  requires 396.02298, found 396.02295  $[\text{M}+\text{H}]^+$ .

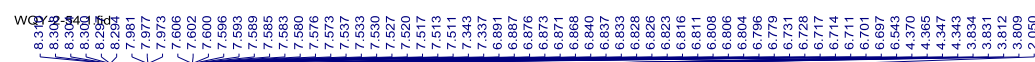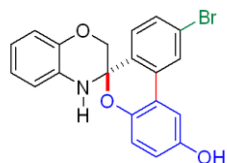

$^1\text{H NMR}$ , 500 MHz, acetone- $d_6$

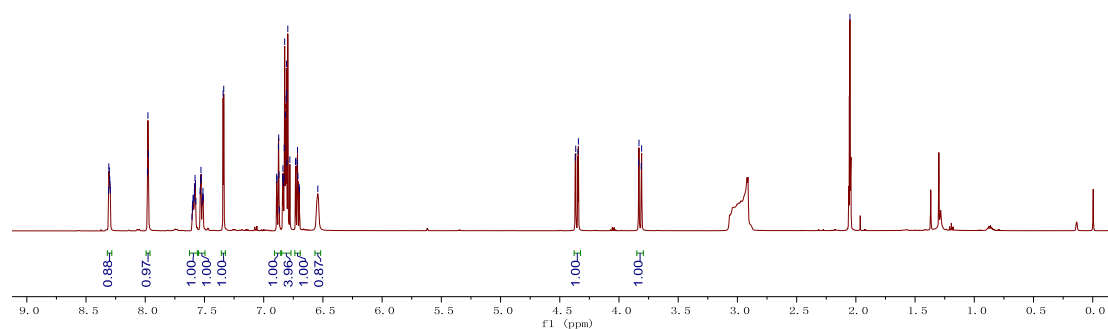

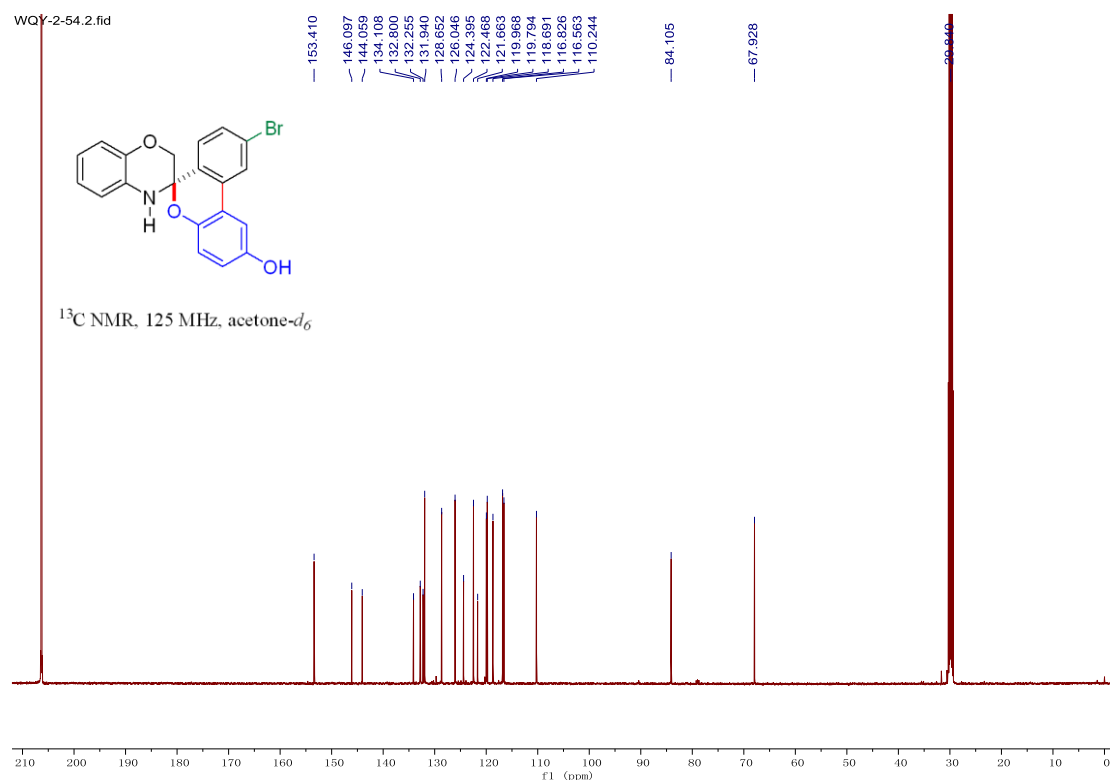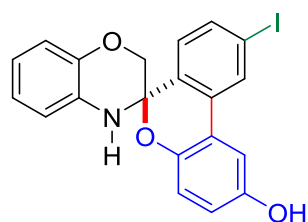

(±)-9'-Iodo-2*H*,4*H*-spiro[benzo[*b*][1,4]oxazine-3,6'-benzo[*c*]chromen]-2'-ol

Compound **3p**: a white solid. Column chromatography, eluent: Petroleum/EtOAc = 8/1,  $R_f$  = 0.25, 41.2 mg, 93% yield. m.p. 135-137 °C.

<sup>1</sup>H NMR (600 MHz, CDCl<sub>3</sub>, TMS)  $\delta$  8.00-7.99 (m, 1H), 7.68-7.66 (m, 1H), 7.23-7.21 (m, 1H), 7.14-7.13 (m, 1H), 6.92 (dd,  $J$  = 7.8, 1.8 Hz, 1H), 6.90-6.86 (m, 2H), 6.81 (td,  $J$  = 7.8, 1.8 Hz, 1H), 6.75-6.72 (m, 2H), 4.84-4.81 (m, 2H), 4.34 (dd,  $J$  = 11.4, 2.4 Hz, 1H), 3.79 (d,  $J$  = 11.4 Hz, 1H).

<sup>13</sup>C NMR (150 MHz, CDCl<sub>3</sub>)  $\delta$  150.9, 145.8, 143.3, 137.6, 132.8, 131.7, 131.6, 130.8, 127.2, 122.2, 120.8, 120.5, 119.7, 118.0, 116.8, 116.1, 109.6, 96.2, 83.7, 67.4.

IR (KBr)  $\nu$ (cm<sup>-1</sup>): 3360, 1612, 1585, 1497, 1431, 1311, 1207, 1045, 941, 744 cm<sup>-1</sup>.

HRMS (ESI) calcd. for [C<sub>20</sub>H<sub>14</sub>INO<sub>3</sub>+H]<sup>+</sup> requires 444.00911, found 444.00729 [M+H]<sup>+</sup>.



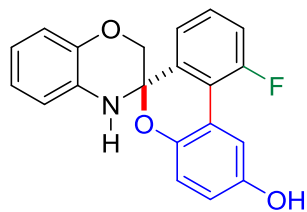

(±)-10'-Fluoro-2*H*,4*H*-spiro[benzo[*b*][1,4]oxazine-3,6'-benzo[*c*]chromen]-2'-ol

Compound **3q**: a white solid. Column chromatography, eluent: Petroleum/EtOAc = 4/1, 13.7 mg, 41% yield.  $R_f$  = 0.34, m.p. 157-159 °C.

$^1\text{H NMR}$  (500 MHz,  $\text{CDCl}_3$ , TMS)  $\delta$  7.58 (d,  $J$  = 3.0 Hz, 1H), 7.37-7.31 (m, 2H), 7.21-7.16 (m, 1H), 6.94-6.91 (m, 2H), 6.88 (td,  $J$  = 7.5, 1.5 Hz, 1H), 6.81 (td,  $J$  = 7.5, 1.5 Hz, 1H), 6.76 (dd,  $J$  = 9.0, 3.0 Hz, 1H), 6.74 (dd,  $J$  = 8.0, 2.0 Hz, 1H), 4.91 (d,  $J$  = 15.0 Hz, 1H), 4.79 (s, 1H), 4.37 (dd,  $J$  = 11.5, 2.0 Hz, 1H), 3.84 (d,  $J$  = 11.0 Hz, 1H).

$^{13}\text{C NMR}$  (125 MHz,  $\text{CDCl}_3$ )  $\delta$  159.7 (d,  $J$  = 251.1 Hz), 150.6, 145.5, 143.4, 135.3 (d,  $J$  = 3.5 Hz), 130.9, 129.7 (d,  $J$  = 9.3 Hz), 122.1, 120.9 (d,  $J$  = 3.3 Hz), 120.5, 119.4, 119.2 (d,  $J$  = 3.1 Hz), 119.1 (d,  $J$  = 11.0 Hz), 117.8 (d,  $J$  = 23.5 Hz), 117.5, 116.8, 116.1, 114.1 (d,  $J$  = 16.8 Hz), 83.3 (d,  $J$  = 2.8 Hz), 67.2.

$^{19}\text{F NMR}$  (470 MHz,  $\text{CDCl}_3$ )  $\delta$  (-114.49)- (-114.53) (m).

**IR** (KBr)  $\nu$  ( $\text{cm}^{-1}$ ): 3366, 2920, 1613, 1499, 1453, 1199, 1082, 949, 842, 740  $\text{cm}^{-1}$ .

**HRMS** (ESI) calcd. for  $[\text{C}_{20}\text{H}_{14}\text{FNO}_3+\text{H}]^+$  requires 336.10305, found 336.10291  $[\text{M}+\text{H}]^+$ .

7.585  
7.579  
7.565  
7.562  
7.553  
7.547  
7.545  
7.544  
7.539  
7.536  
7.532  
7.530  
7.525  
7.517  
7.317  
7.315  
7.307  
7.306  
7.207  
7.206  
7.203  
7.201  
7.193  
7.191  
7.188  
7.187  
7.184  
7.182  
7.179  
7.168  
7.166  
7.163  
6.935  
6.931  
6.929  
6.917  
6.913  
6.894  
6.891  
6.879  
6.876  
6.861  
6.861  
6.828  
6.825  
6.813  
6.810  
6.798  
6.795  
6.776  
6.770  
6.758  
6.753  
6.746  
6.742  
6.730  
6.727  
4.920  
4.890  
4.786  
4.385  
4.381  
4.362  
4.358  
3.646  
3.624  
— 0.000

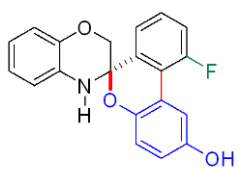

<sup>1</sup>H NMR, 500 MHz, CDCl<sub>3</sub>

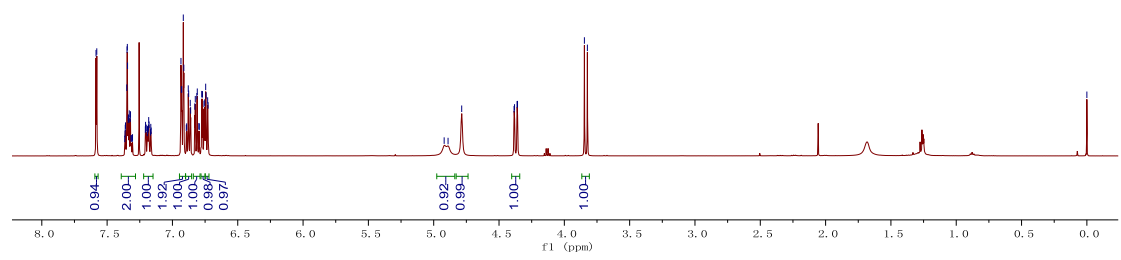

160.698  
158.695  
150.612  
145.527  
143.440  
135.313  
135.288  
130.680  
129.751  
129.677  
122.124  
120.959  
120.933  
120.465  
119.399  
119.216  
119.191  
119.117  
119.029  
117.881  
117.693  
117.455  
116.757  
116.097  
114.175  
114.041  
83.344  
83.322  
77.460  
67.198

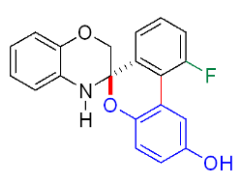

<sup>13</sup>C NMR, 125 MHz, CDCl<sub>3</sub>

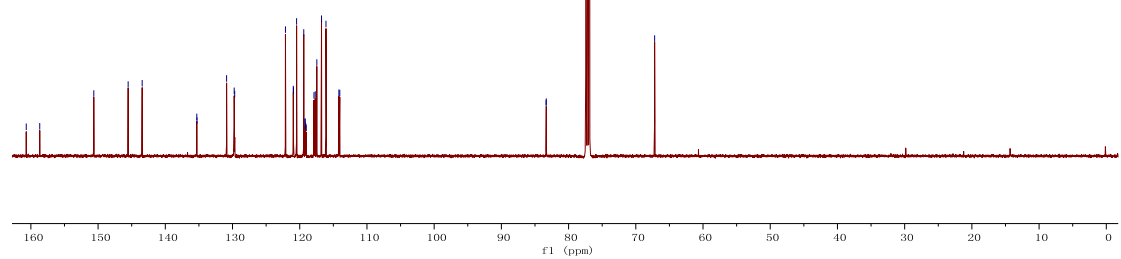

WQY-2-71A.4.fid

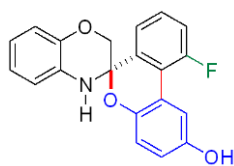

$^{19}\text{F}$  NMR, 470 MHz,  $\text{CDCl}_3$

-114.494  
-114.503  
-114.519  
-114.529

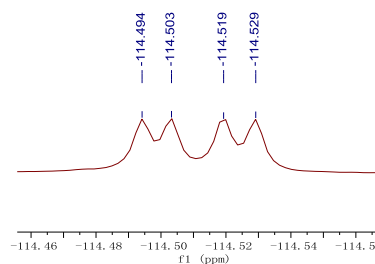

20 10 0 -10 -20 -30 -40 -50 -60 -70 -80 -90 -100 -110 -120 -130 -140 -150 -160 -170 -180 -190 -200 -210 -2

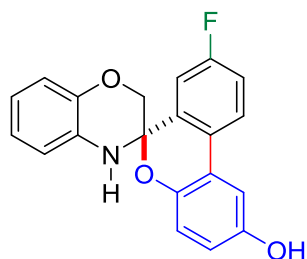

(±)-8'-Fluoro-2*H*,4*H*-spiro[benzo[*b*][1,4]oxazine-3,6'-benzo[*c*]chromen]-2'-ol

Petroleum Compound **3q'**: a white solid. Column chromatography, eluent:EtOAc = 4/1, 19.4 mg,  $R_f = 0.24$ , 58% yield. m.p. 170-172 °C.

$^1\text{H}$  NMR (600 MHz, acetone- $d_6$ )  $\delta$  8.20 (d,  $J = 1.2$  Hz, 1H), 7.90-7.87 (m, 1H), 7.37 (dd,  $J = 9.6, 3.0$  Hz, 1H), 7.30-7.27 (m, 2H), 6.90 (dd,  $J = 7.8, 1.2$  Hz, 1H), 6.85-6.76 (m, 4H), 6.74-6.71 (m, 1H), 6.54 (s, 1H), 4.35 (dd,  $J = 11.4, 2.4$  Hz, 1H), 3.85 (d,  $J = 11.4$  Hz, 1H).

$^{13}\text{C}$  NMR (150 MHz, acetone- $d_6$ )  $\delta$  163.7 (d,  $J = 203.5$  Hz), 153.4, 145.4, 144.1, 135.7 (d,  $J = 5.6$  Hz), 132.8, 128.3 (d,  $J = 2.8$  Hz), 125.7 (d,  $J = 6.9$  Hz), 122.5, 122.4, 120.0, 119.7, 117.7, 117.3 (d,  $J = 18.0$  Hz), 116.8, 116.7, 113.4 (d,  $J = 19.8$  Hz), 110.0, 83.9 (d,  $J = 1.6$  Hz), 67.8.

<sup>19</sup>F NMR (470 MHz, acetone-*d*<sub>6</sub>) δ (-109.34)- (-109.39) (m).

IR (KBr) ν(cm<sup>-1</sup>): 3355, 2920, 1961, 1455, 1314, 1248, 1049, 950, 859, 748 cm<sup>-1</sup>.

HRMS (ESI) calcd. for [C<sub>20</sub>H<sub>14</sub>FNO<sub>3</sub>+Na]<sup>+</sup> requires 358.08499, found 358.08359

[M+Na]<sup>+</sup>.

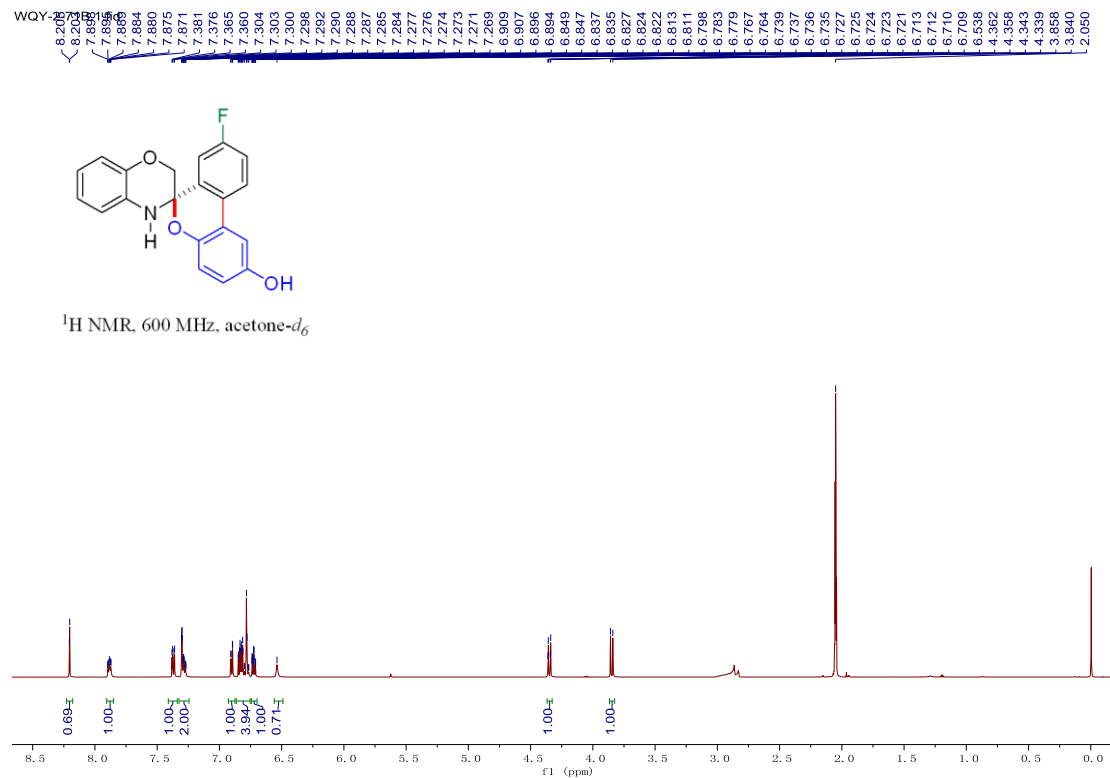



WQY-2-71B.2.fid

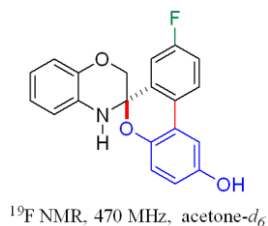

-109.341  
-109.358  
-109.373  
-109.394

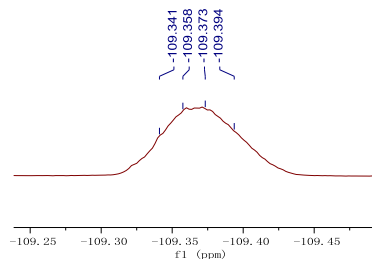

20 10 0 -10 -20 -30 -40 -50 -60 -70 -80 -90 -100 -110 -120 -130 -140 -150 -160 -170 -180 -190 -200 -210 -2

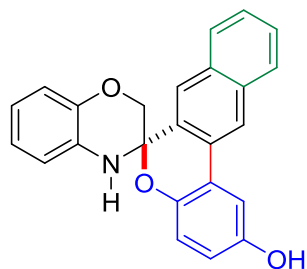

(±)-2*H*,4*H*-spiro[benzo[*b*][1,4]oxazine-3,6'-naphtho[2,3-*c*]chromen]-2'-ol

Compound **3r**: a white solid. Column chromatography, eluent: Petroleum/EtOAc = 4/1,  $R_f$  = 0.25, 29 mg, 80% yield. m.p. 140-145 °C.

$^1\text{H}$  NMR (500 MHz, acetone- $d_6$ )  $\delta$  8.35 (d,  $J$  = 3.0 Hz, 1H), 8.23-8.22 (m, 1H), 8.14 (s, 1H), 8.03 (d,  $J$  = 8.0 Hz, 1H), 7.99-7.96 (m, 1H), 7.59-7.52 (m, 3H), 6.97 (dd,  $J$  = 8.0, 1.5 Hz, 1H), 6.88-6.82 (m, 4H), 6.76-6.72 (m, 1H), 6.61 (broad, 1H), 4.42 (dd,  $J$  = 11.5, 2.5 Hz, 1H), 3.85 (d,  $J$  = 11.5 Hz, 1H).

$^{13}\text{C}$  NMR (125 MHz, acetone- $d_6$ )  $\delta$  153.5, 146.3, 144.2, 134.8, 134.0, 133.2, 132.2, 129.4, 129.1, 128.9, 127.9, 127.3, 126.1, 123.2, 122.5, 122.2, 120.0, 119.9, 118.1, 116.8, 116.6, 110.4, 84.5, 68.5.

IR (KBr)  $\nu$ ( $\text{cm}^{-1}$ ): 3356, 2921, 1690, 1431, 1310, 1212, 1047, 946, 858, 749  $\text{cm}^{-1}$ .

HRMS (ESI) calcd. for  $[C_{24}H_{17}NO_3+H]^+$  requires 368.12812, found 368.12814

$[M+H]^+$ .

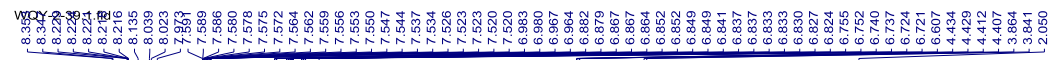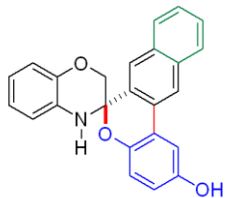

$^1H$  NMR, 500 MHz, acetone- $d_6$

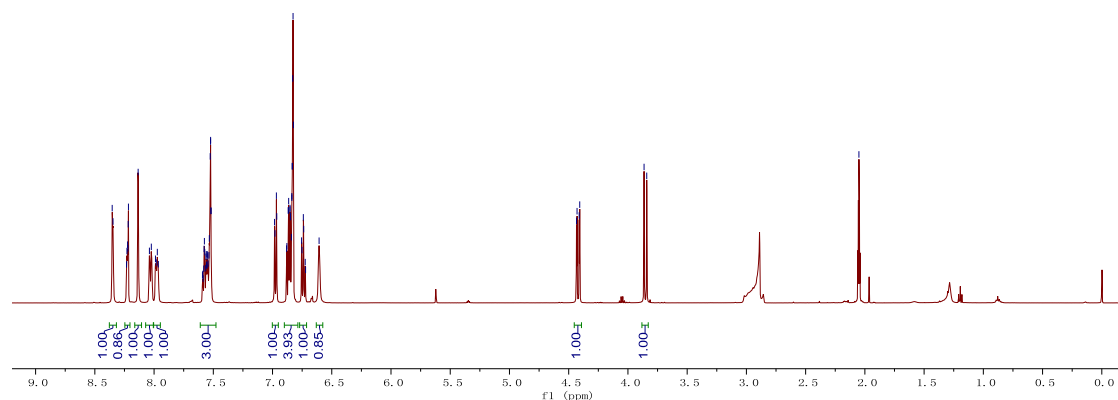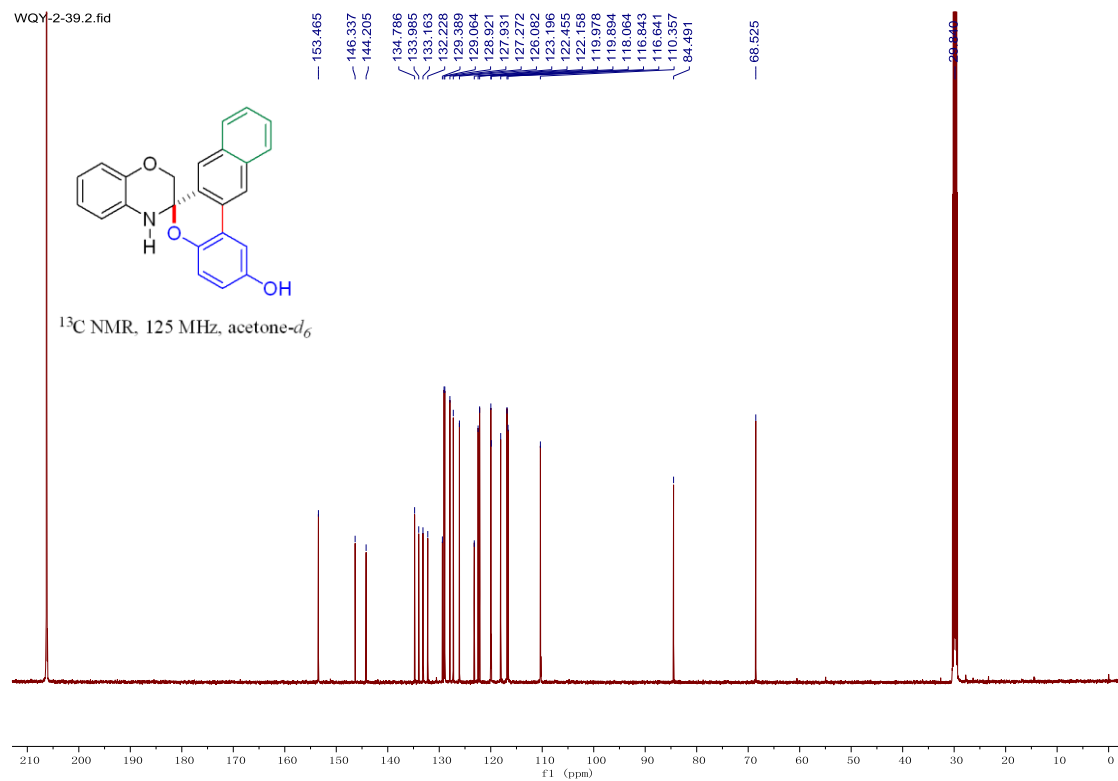

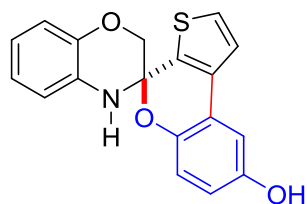

(±)-2*H*,4*H*-spiro[benzo[*b*][1,4]oxazine-3,4'-thieno[2,3-*c*]chromen]-8'-ol

Compound **3s**: a yellow solid. Column chromatography, eluent: Petroleum/EtOAc = 5/1,  $R_f = 0.2$ , 11 mg, 34% yield. m.p. 140-142 °C.

$^1\text{H NMR}$  (500 MHz, acetone- $d_6$ )  $\delta$  8.18-8.15 (m, 1H), 7.63-7.61 (m, 1H), 7.47 (dt,  $J = 5.0, 1.5$  Hz, 1H), 7.10 (d,  $J = 2.5$  Hz, 1H), 6.85-6.80 (m, 3H), 6.78 (d,  $J = 9.0$  Hz, 1H), 6.74-6.66 (m, 3H), 4.40 (dd,  $J = 11.5, 2.0$  Hz, 1H), 3.99 (d,  $J = 11.5$  Hz, 1H).

$^{13}\text{C NMR}$  (125 MHz, acetone- $d_6$ )  $\delta$  153.1, 145.2, 144.0, 135.7, 132.5, 132.2, 128.4, 123.7, 122.5, 121.4, 120.2, 119.0, 116.9, 116.41, 116.36, 110.6, 83.8, 69.2.

**IR (KBr)**  $\nu(\text{cm}^{-1})$ : 3361, 1612, 1449, 1311, 1312, 1283, 1208, 1037, 845, 747  $\text{cm}^{-1}$ .

**HRMS (ESI)** calcd. for  $[\text{C}_{18}\text{H}_{13}\text{NO}_3\text{S}+\text{H}]^+$  requires 324.06889, found 324.06714  $[\text{M}+\text{H}]^+$ .

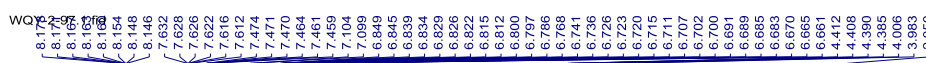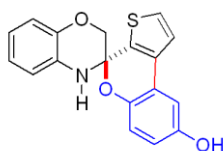

$^1\text{H NMR}$ , 500 MHz, acetone- $d_6$

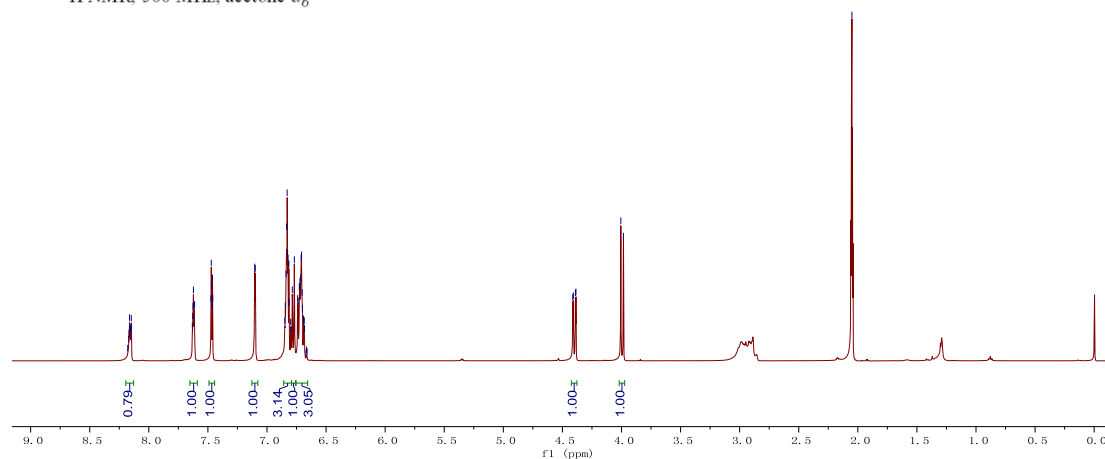

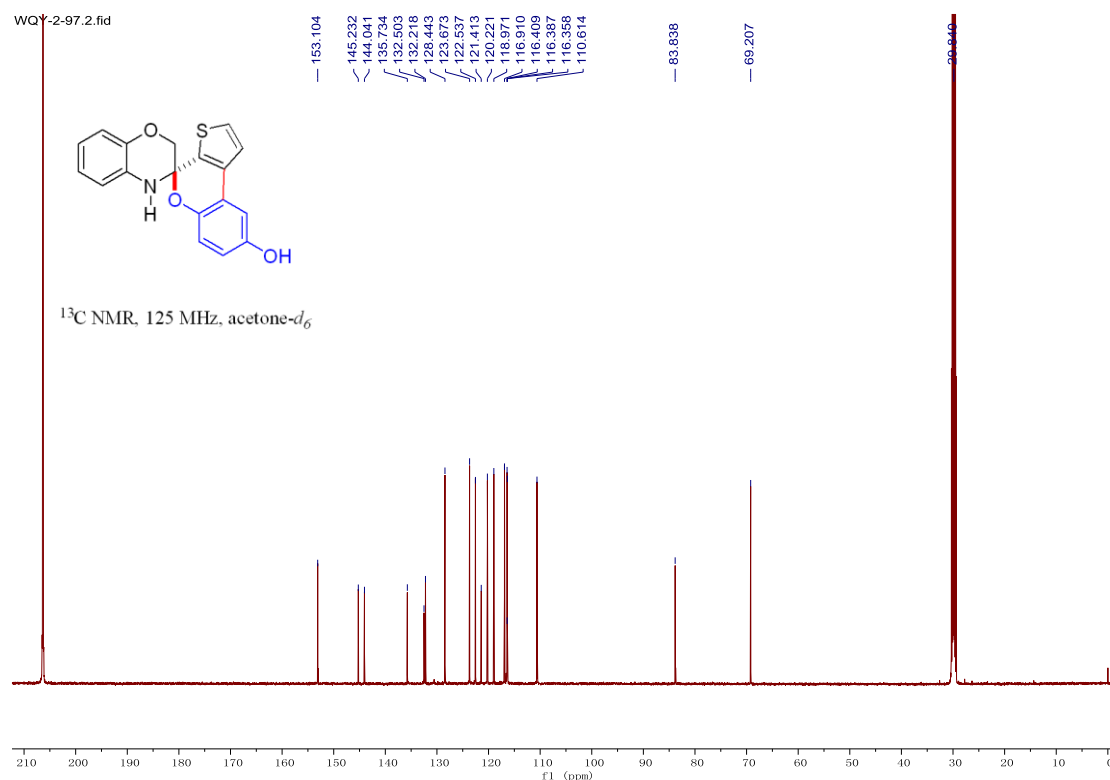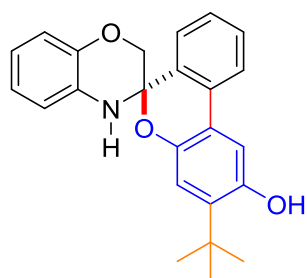

(±)-3'-(*tert*-Butyl)-2*H*,4*H*-spiro[benzo[*b*][1,4]oxazine-3,6'-benzo[*c*]chromen]-2'-ol

Compound **3t**: a colorless oil. Column chromatography, eluent: Petroleum/EtOAc = 4/1,  $R_f = 0.3$ , 30.5 mg, 82% yield.

<sup>1</sup>H NMR (500 MHz, CDCl<sub>3</sub>, TMS)  $\delta$  7.66 (d,  $J = 8.0$  Hz, 1H), 7.48 (dd,  $J = 7.5$ , 1.5 Hz, 1H), 7.43 (td,  $J = 7.5$ , 1.5 Hz, 1H), 7.36 (td,  $J = 7.5$ , 1.0 Hz, 1H), 7.12 (d,  $J = 3.0$  Hz, 1H), 6.88-6.83 (m, 2H), 6.81 (d,  $J = 2.5$  Hz, 1H), 6.77 (td,  $J = 7.5$ , 1.5 Hz, 1H), 6.68 (dd,  $J = 7.5$ , 1.5 Hz, 1H), 4.85 (broad, 1H), 4.79 (broad, 1H), 4.47 (d,  $J = 11.5$  Hz, 1H), 4.02 (d,  $J = 11.5$  Hz, 1H), 1.23 (s, 9H).

<sup>13</sup>C NMR (125 MHz, CDCl<sub>3</sub>)  $\delta$  149.7, 144.4, 143.2, 141.7, 131.8, 131.3, 130.9, 129.8, 128.5, 124.4, 123.2, 122.3, 121.9, 120.1, 116.7, 115.63, 115.57, 107.2, 83.1, 68.0, 34.9, 29.8.

IR (KBr)  $\nu(\text{cm}^{-1})$ : 3394, 2955, 1501, 1420, 1312, 1281, 1211, 1196, 856, 748  $\text{cm}^{-1}$ .

HRMS (ESI) calcd. for  $[\text{C}_{24}\text{H}_{23}\text{NO}_3+\text{H}]^+$  requires 374.17507, found 374.17313

$[\text{M}+\text{H}]^+$ .

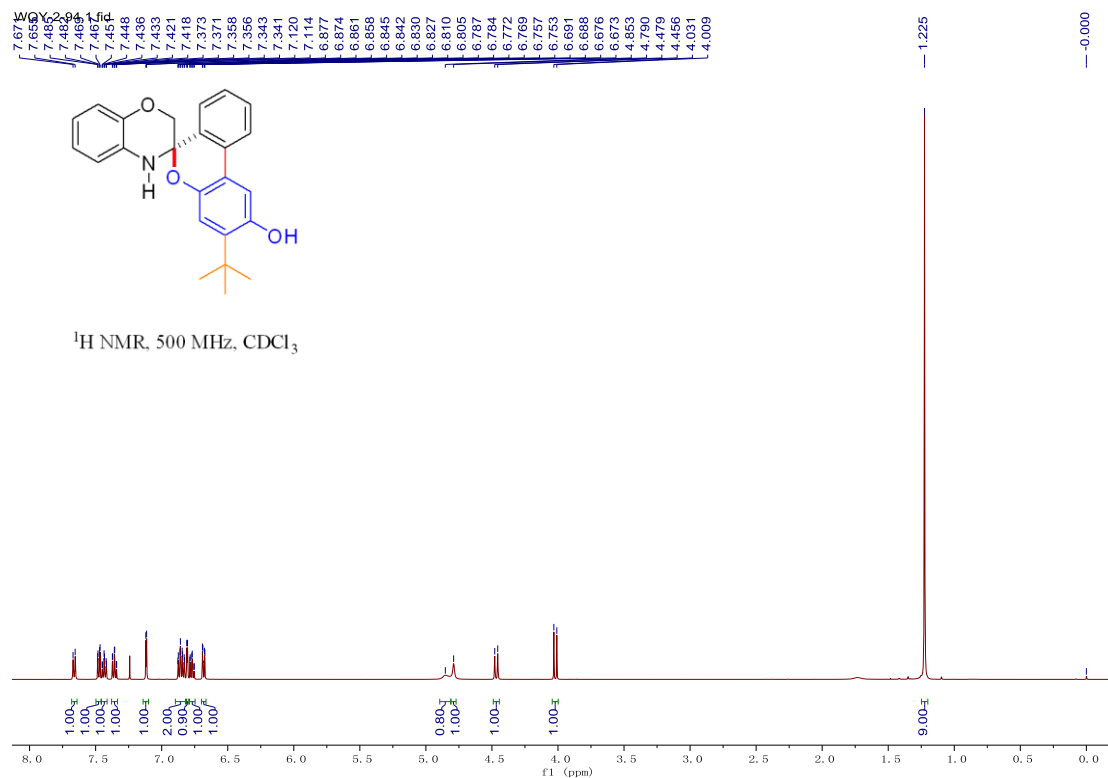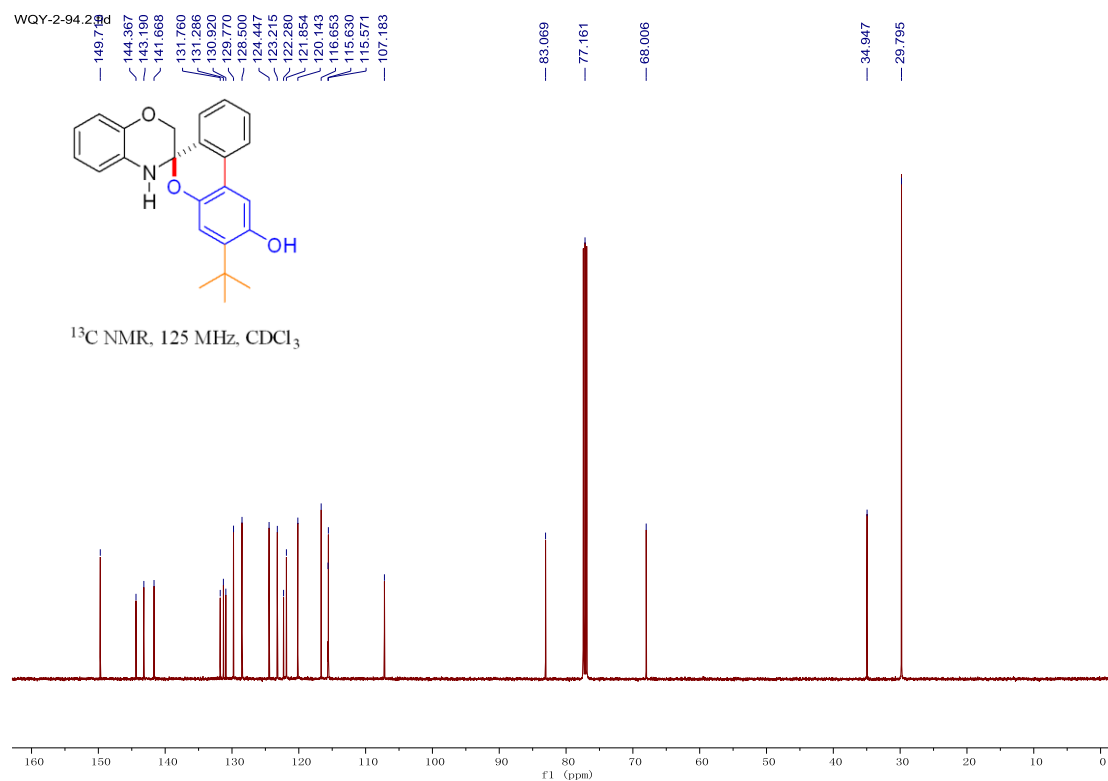

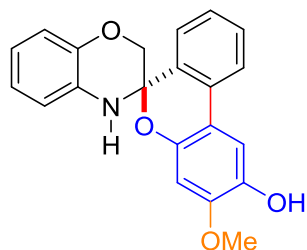

(±)-3'-Methoxy-2H,4H-spiro[benzo[*b*][1,4]oxazine-3,6'-benzo[*c*]chromen]-2'-ol

Compound **3u**: a white solid. Column chromatography, eluent: Petroleum/EtOAc = 4/1,  $R_f = 0.25$ , 22.2 mg, 64% yield. m.p. 118-120 °C.

**$^1\text{H}$  NMR** (600 MHz, acetone- $d_6$ )  $\delta$  7.75 (d,  $J = 8.4$  Hz, 1H), 7.53 (d,  $J = 7.8$  Hz, 1H), 7.48-7.45 (m, 1H), 7.39 (s, 1H), 7.36-7.33 (m, 1H), 7.31 (s, 1H), 6.91 (dd,  $J = 7.8, 1.8$  Hz, 1H), 6.85-6.82 (m, 2H), 6.73-6.70 (m, 1H), 6.53 (s, 1H), 6.49 (broad, 1H), 4.37 (dd,  $J = 11.4, 2.4$  Hz, 1H), 3.84 (d, 1.2 Hz, 3H), 3.80 (d,  $J = 11.4$  Hz, 1H).

**$^{13}\text{C}$  NMR** (150 MHz, acetone- $d_6$ )  $\delta$  150.0, 146.4, 144.1, 142.6, 133.1, 131.9, 131.8, 130.4, 128.1, 126.3, 122.5, 122.4, 119.7, 116.8, 116.5, 114.3, 109.7, 102.4, 84.5, 68.2, 56.3.

**IR (KBr)**  $\nu(\text{cm}^{-1})$ : 3362, 1697, 1605, 1491, 1439, 1310, 1197, 940, 864, 749  $\text{cm}^{-1}$ .

**HRMS** (ESI) calcd. for  $[\text{C}_{21}\text{H}_{17}\text{NO}_4+\text{H}]^+$  requires 348.12303, found 348.12283  $[\text{M}+\text{H}]^+$ .

7.755  
7.739  
7.639  
7.526  
7.478  
7.476  
7.474  
7.466  
7.464  
7.461  
7.453  
7.451  
7.386  
7.365  
7.353  
7.350  
7.342  
7.340  
7.338  
7.330  
7.328  
7.325  
7.311  
6.921  
6.918  
6.908  
6.905  
6.850  
6.847  
6.838  
6.835  
6.822  
6.825  
6.819  
6.732  
6.729  
6.719  
6.716  
6.716  
6.706  
6.704  
6.527  
6.492  
4.382  
4.378  
4.363  
4.359  
3.836  
3.834  
3.806  
3.787  
2.050

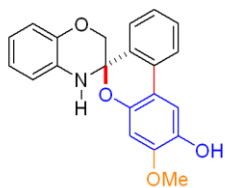

<sup>1</sup>H NMR, 600 MHz, acetone-*d*<sub>6</sub>

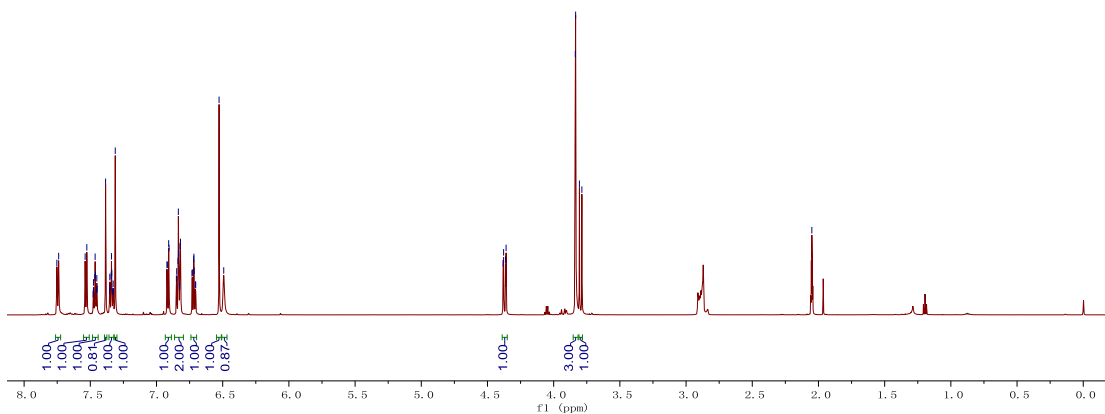

WQY-2-33.2.fid

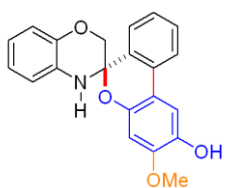

<sup>13</sup>C NMR, 150 MHz, acetone-*d*<sub>6</sub>

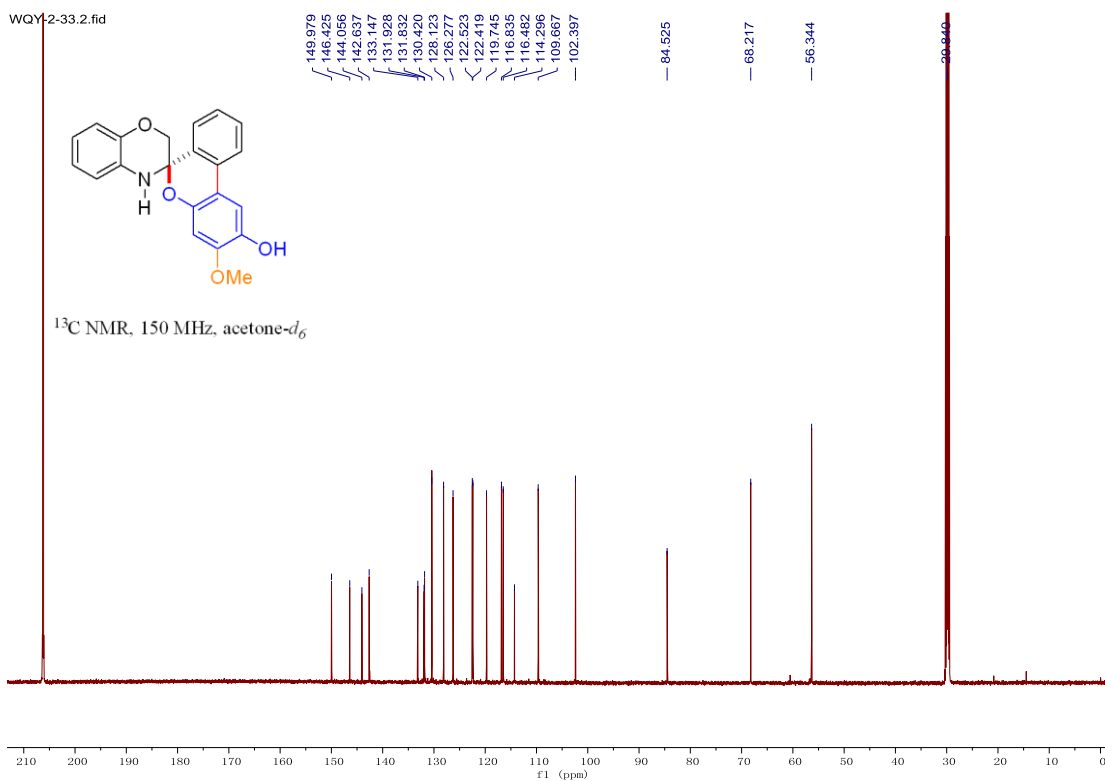

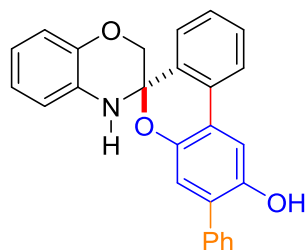

(±)-3'-Phenyl-2*H*,4*H*-spiro[benzo[*b*][1,4]oxazine-3,6'-benzo[*c*]chromen]-2'-ol

Compound **3v**: a white solid. Column chromatography, eluent: Petroleum/EtOAc = 4/1,  $R_f = 0.3$ , 21.1 mg, 54% yield. m.p. 185-188 °C.

**$^1\text{H NMR}$**  (500 MHz,  $\text{CDCl}_3$ , TMS)  $\delta$  7.69-7.67 (m, 1H), 7.57-7.55 (m, 2H), 7.47-7.44 (m, 2H), 7.34 (td,  $J = 7.5, 1.5$  Hz, 1H), 7.21 (d,  $J = 2.5$  Hz, 1H), 7.18-7.11 (m, 3H), 6.96 (dd,  $J = 8.0, 1.5$  Hz, 1H), 6.85-6.81 (m, 2H), 6.78 (td,  $J = 8.0, 1.5$  Hz, 1H), 6.48 (dd,  $J = 7.5, 1.5$  Hz, 1H), 4.77 (s, 1H), 4.67 (s, 1H), 4.54 (dd,  $J = 11.0, 2.0$  Hz, 1H), 3.96 (d,  $J = 11.5$  Hz, 1H).

**$^{13}\text{C NMR}$**  (125 MHz,  $\text{CDCl}_3$ )  $\delta$  150.3, 143.2, 142.4, 136.8, 132.9, 131.7, 130.9, 130.5, 129.6, 129.4, 128.7, 128.0, 127.2, 124.8, 123.0, 122.9, 121.7, 120.2, 118.1, 116.3, 116.2, 108.7, 83.5, 67.7.

**IR (KBr)**  $\nu(\text{cm}^{-1})$ : 3339, 2923, 1599, 1501, 1310, 1210, 1060, 938, 858, 745  $\text{cm}^{-1}$ .

**HRMS** (ESI) calcd. for  $[\text{C}_{26}\text{H}_{19}\text{NO}_3+\text{H}]^+$  requires 394.14377, found 394.14377  $[\text{M}+\text{H}]^+$ .





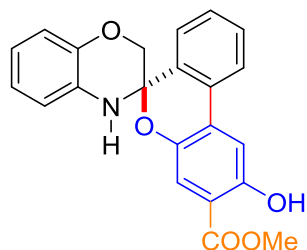

(±)-Methyl 2'-hydroxy-2*H*,4*H*-spiro[benzo[*b*][1,4]oxazine-3,6'-benzo[*c*]chromene]-3'-carboxylate

Compound **3w**: a white solid. Column chromatography, eluent: Petroleum/EtOAc = 4/1,  $R_f = 0.67$ , 5.5 mg, 15% yield. m.p. 202-205 °C.

$^1\text{H NMR}$  (600 MHz,  $\text{CDCl}_3$ )  $\delta$  10.48 (s, 1H), 7.81 (d,  $J = 7.8$  Hz, 1H), 7.56 (dd,  $J = 7.8$ , 1.2 Hz, 1H), 7.54-7.51 (m, 2H), 7.47 (td,  $J = 7.2$ , 1.2 Hz, 1H), 7.37 (s, 1H), 6.94 (d,  $J = 7.2$  Hz, 1H), 6.90 (td,  $J = 7.8$ , 1.8 Hz, 1H), 6.83 (td,  $J = 7.8$ , 1.8 Hz, 1H), 6.76 (dd,  $J = 7.8$ , 1.8 Hz, 1H), 4.78 (d,  $J = 2.4$  Hz, 1H), 4.35 (dd,  $J = 11.4$ , 2.4 Hz, 1H), 3.91 (s, 3H), 3.88 (d,  $J = 11.4$  Hz, 1H).

$^{13}\text{C NMR}$  (150 MHz,  $\text{CDCl}_3$ )  $\delta$  170.1, 156.7, 143.9, 143.4, 133.2, 130.9, 130.18, 130.17, 129.7, 129.1, 125.5, 123.8, 122.1, 120.5, 118.9, 116.8, 116.0, 113.0, 111.4, 83.7, 67.8, 52.5.

**IR (KBr)**  $\nu(\text{cm}^{-1})$ : 3364, 2924, 1676, 1500, 1439, 1242, 1208, 730, 682, 589  $\text{cm}^{-1}$ .

**HRMS (ESI)** calcd. for  $[\text{C}_{22}\text{H}_{17}\text{NO}_5 + \text{H}]^+$  requires 376.11795, found 376.11621  $[\text{M} + \text{H}]^+$ .

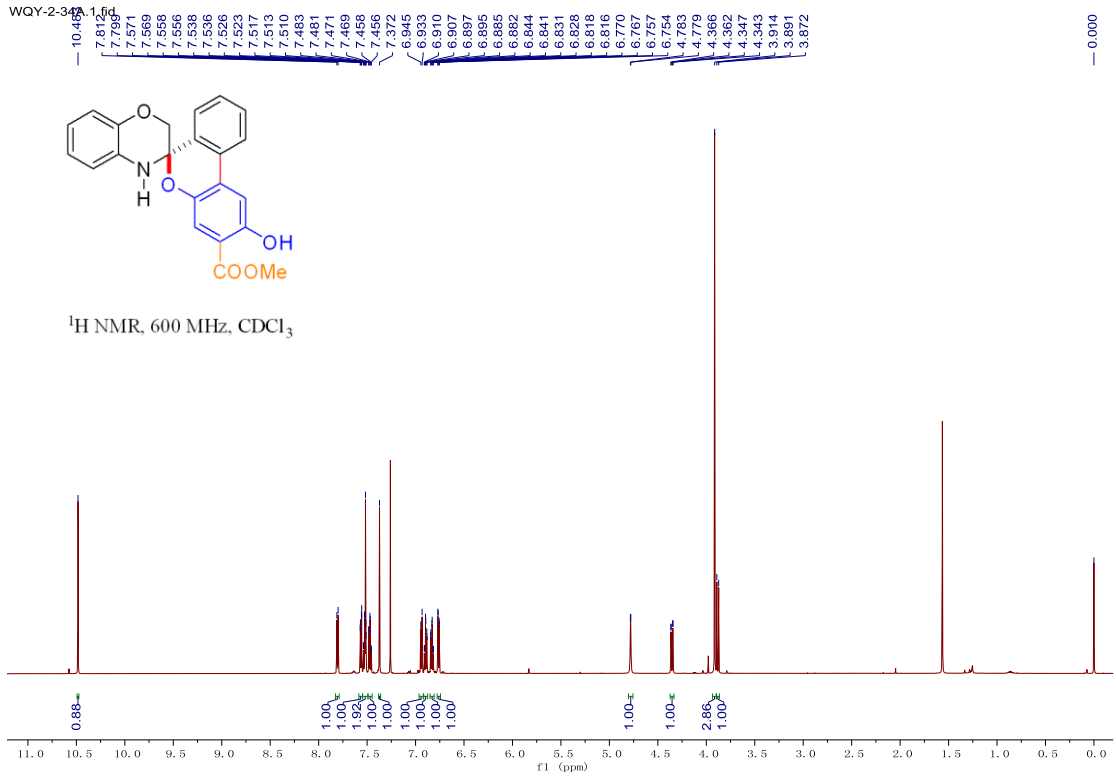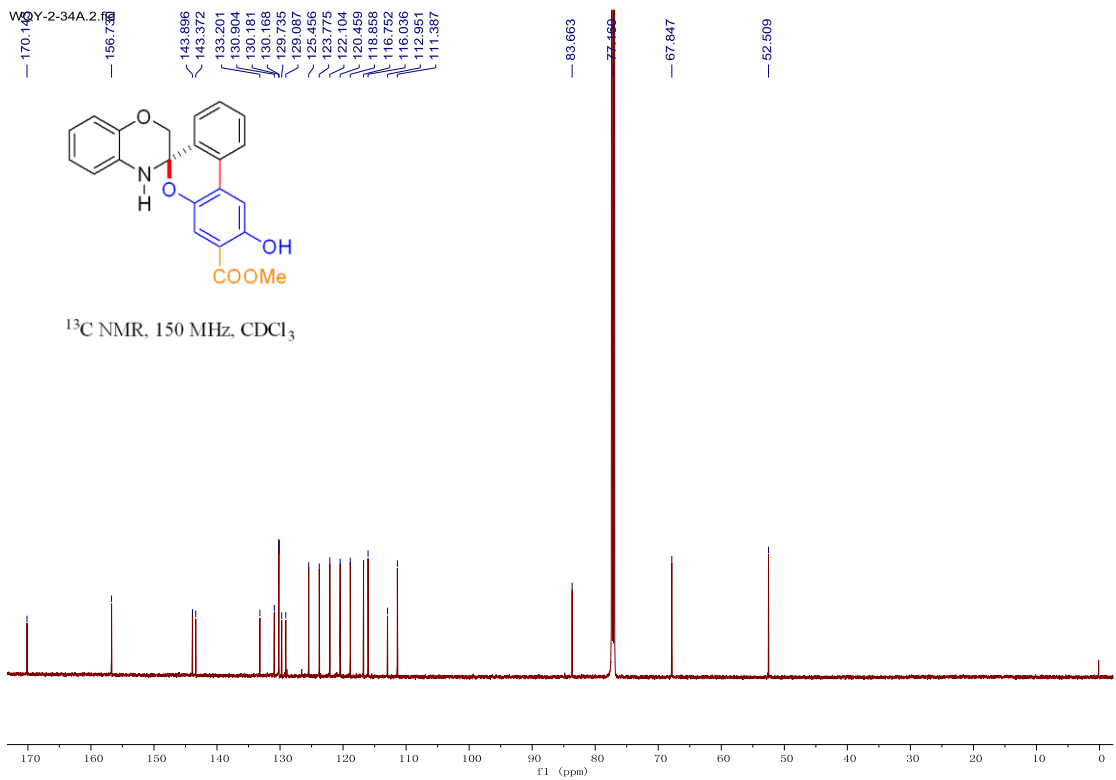

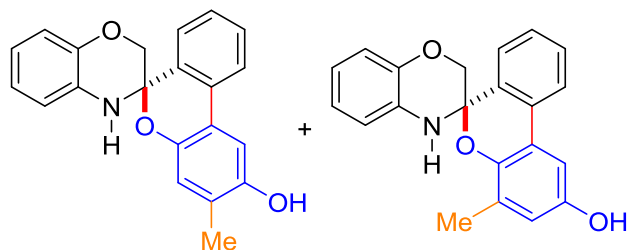

(±)-3'-Methyl-2*H*,4*H*-spiro[benzo[*b*][1,4]oxazine-3,6'-benzo[*c*]chromen]-2'-ol

(±)-4'-Methyl-2*H*,4*H*-spiro[benzo[*b*][1,4]oxazine-3,6'-benzo[*c*]chromen]-2'-ol

Compound **3x** and **3x'** (mixture, 0.75:1 or 1:0.75): a white solid. Column chromatography, eluent: Petroleum/EtOAc = 4/1,  $R_f = 0.25$ , 18.1 mg, 55% yield. m.p. 85-88 °C.

**<sup>1</sup>H NMR** (500 MHz, acetone-*d*<sub>6</sub>)  $\delta$  8.04 (broad, 1.34H), 7.80 (d,  $J = 7.5$  Hz, 1H), 7.72 (d,  $J = 8.0$  Hz, 0.75H), 7.57 (t,  $J = 8.0$  Hz, 1.75H), 7.51-7.45 (m, 1.78H), 7.43-7.36 (m, 1.77H), 7.30 (d,  $J = 2.0$  Hz, 0.73H), 7.15 (t,  $J = 2.5$  Hz, 1H), 6.92-6.89 (m, 1.75H), 6.84-6.80 (m, 3.48H), 6.73-6.66 (m, 3.49H), 6.44 (broad, 1.50H), 4.34 (dd,  $J = 11.0, 2.0$  Hz, 0.75H), 4.30 (dd,  $J = 11.0, 2.0$  Hz, 1H), 3.82 (d,  $J = 8.0$  Hz, 1H), 3.79 (d,  $J = 8.0$  Hz, 0.75H), 2.19 (s, 2.12H), 2.04 (s, 3H).

**<sup>13</sup>C NMR** (125 MHz, acetone-*d*<sub>6</sub>)  $\delta$  152.8, 151.3, 145.7, 144.3, 144.1, 143.9, 133.5, 133.1, 132.9, 132.2, 131.9, 130.4, 129.5, 129.1, 128.7, 127.8, 126.3, 126.1, 123.4, 122.9, 122.7, 122.4, 122.3, 120.8, 120.3, 119.9, 119.8, 119.0, 116.8, 116.7, 116.6, 116.5, 109.3, 107.6, 84.1, 68.14, 68.11, 16.3, 15.8.

**IR (KBr)**  $\nu$ (cm<sup>-1</sup>): 3362, 1697, 1605, 1491, 1439, 1310, 1197, 940, 864, 749 cm<sup>-1</sup>.

**HRMS** (ESI) calcd. for [C<sub>21</sub>H<sub>17</sub>NO<sub>3</sub>+H]<sup>+</sup> requires 332.12812, found 332.12796 [M+H]<sup>+</sup>.

7.805  
7.792  
7.778  
7.718  
7.583  
7.567  
7.555  
7.495  
7.493  
7.490  
7.487  
7.483  
7.480  
7.475  
7.472  
7.467  
7.427  
7.424  
7.415  
7.412  
7.409  
7.397  
7.394  
7.392  
7.388  
7.376  
7.397  
7.293  
7.157  
7.152  
7.147  
6.919  
6.916  
6.909  
6.904  
6.901  
6.894  
6.890  
6.841  
6.837  
6.834  
6.826  
6.822  
6.810  
6.807  
6.804  
6.730  
6.726  
6.722  
6.716  
6.711  
6.700  
6.696  
6.692  
6.674  
6.668  
6.662  
6.437  
6.435  
4.351  
4.333  
4.328  
4.311  
4.306  
4.288  
4.284  
3.823  
3.807  
3.785  
2.050  
2.041

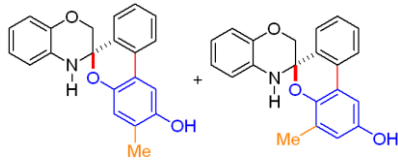

<sup>1</sup>H NMR, 500 MHz, acetone-*d*<sub>6</sub>

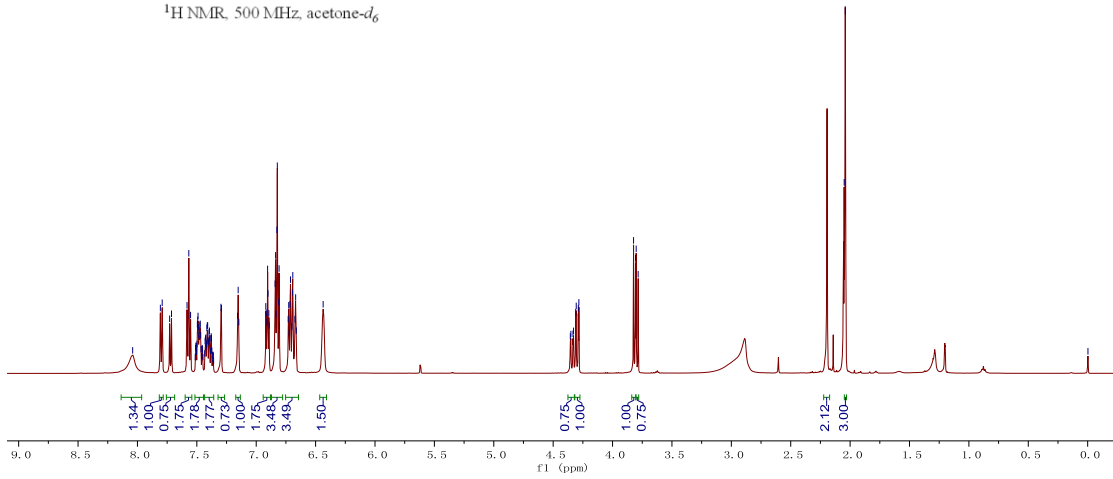

152.768  
151.970  
148.723  
144.313  
144.111  
143.896  
133.481  
133.135  
132.852  
132.158  
131.865  
130.361  
129.471  
129.066  
128.745  
127.778  
126.307  
126.067  
123.449  
122.880  
122.729  
122.364  
122.279  
120.750  
120.299  
119.975  
119.894  
119.776  
118.698  
118.695  
118.762  
118.726  
118.700  
116.583  
116.524  
109.292  
107.626  
84.107  
68.144  
68.105  
16.288  
15.628

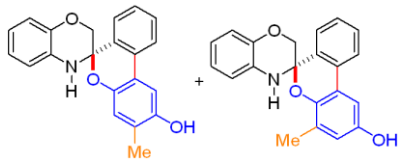

<sup>13</sup>C NMR, 125 MHz, acetone-*d*<sub>6</sub>

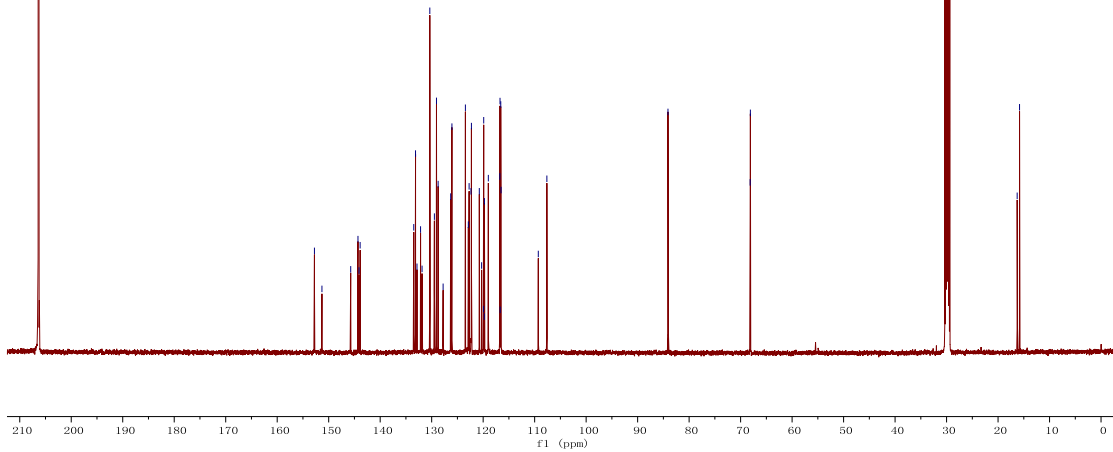

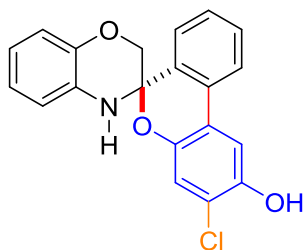

(±)-3'-chloro-2*H*,4*H*-spiro[benzo[*b*][1,4]oxazine-3,6'-benzo[*c*]chromen]-2'-ol

Compound **3y**: a white solid. Column chromatography, eluent: Petroleum/EtOAc/DCM = 15/1/8,  $R_f = 0.36$ , 14.6 mg, 42% yield. m.p. 166-170 °C.

**$^1\text{H}$  NMR** (500 MHz,  $\text{CDCl}_3$ , TMS)  $\delta$  7.70 (dd,  $J = 8.0, 1.5$  Hz, 1H), 7.52 (dd,  $J = 7.5, 1.5$  Hz, 1H), 7.48 (td,  $J = 7.5, 1.5$  Hz, 1H), 7.42-7.39 (m, 2H), 7.03 (s, 1H), 6.93 (dd,  $J = 8.0, 1.5$  Hz, 1H), 6.89 (td,  $J = 7.5, 1.5$  Hz, 1H), 6.82 (td,  $J = 7.5, 1.5$  Hz, 1H), 6.75 (dd,  $J = 7.5, 1.5$  Hz, 1H), 5.35 (s, 1H), 4.79 (s, 1H), 4.37 (dd,  $J = 11.5, 2.0$  Hz, 1H), 3.85 (d,  $J = 11.5$  Hz, 1H).

**$^{13}\text{C}$  NMR** (125 MHz,  $\text{CDCl}_3$ )  $\delta$  146.8, 145.6, 143.3, 132.0, 130.9, 130.1, 130.0, 129.1, 125.4, 122.8, 122.1, 121.8, 120.7, 120.5, 118.8, 116.8, 116.0, 110.0, 84.1, 67.8.

**IR (KBr)**  $\nu(\text{cm}^{-1})$ : 3391, 2924, 1609, 1501, 1485, 1265, 1192, 941, 868, 748  $\text{cm}^{-1}$ .

**HRMS** (ESI) calcd. for  $[\text{C}_{20}\text{H}_{14}\text{ClNO}_3+\text{H}]^+$  requires 352.07350, found 352.07187  $[\text{M}+\text{H}]^+$ .

7.706  
7.700  
7.690  
7.687  
7.683  
7.525  
7.510  
7.500  
7.497  
7.485  
7.482  
7.470  
7.467  
7.416  
7.410  
7.401  
7.394  
7.389  
7.385  
7.030  
6.941  
6.938  
6.925  
6.922  
6.906  
6.903  
6.891  
6.888  
6.876  
6.873  
6.838  
6.835  
6.819  
6.807  
6.804  
6.757  
6.754  
6.742  
6.736  
6.735  
4.705  
4.702  
4.384  
4.380  
4.361  
4.358  
3.865  
3.842

0.000

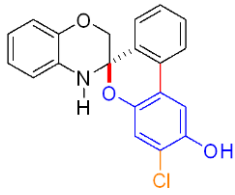

$^1\text{H}$  NMR, 500 MHz,  $\text{CDCl}_3$

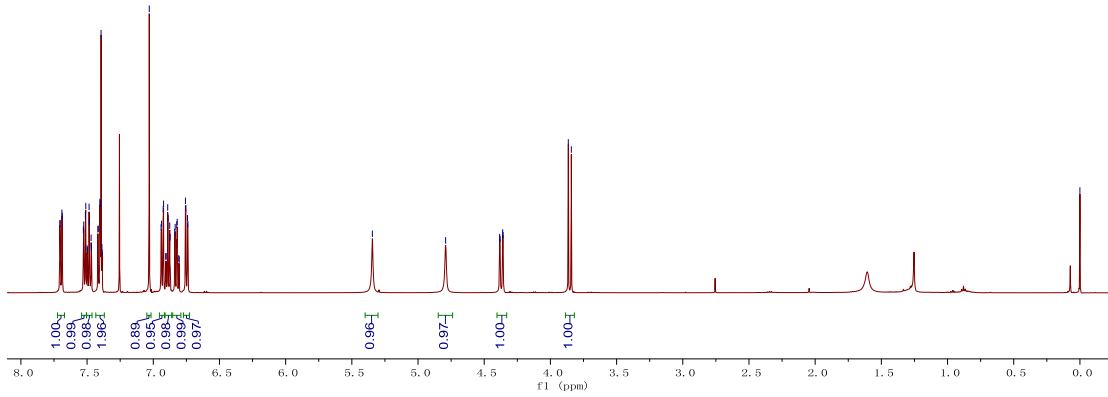

WQY-2-56A  
146.808  
145.589  
143.337  
131.950  
130.857  
130.110  
130.038  
129.133  
125.401  
122.643  
122.170  
121.787  
120.656  
120.455  
118.791  
118.773  
115.975  
110.032

84.101  
77.469  
67.752

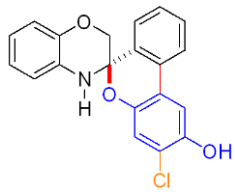

$^{13}\text{C}$  NMR, 125 MHz,  $\text{CDCl}_3$

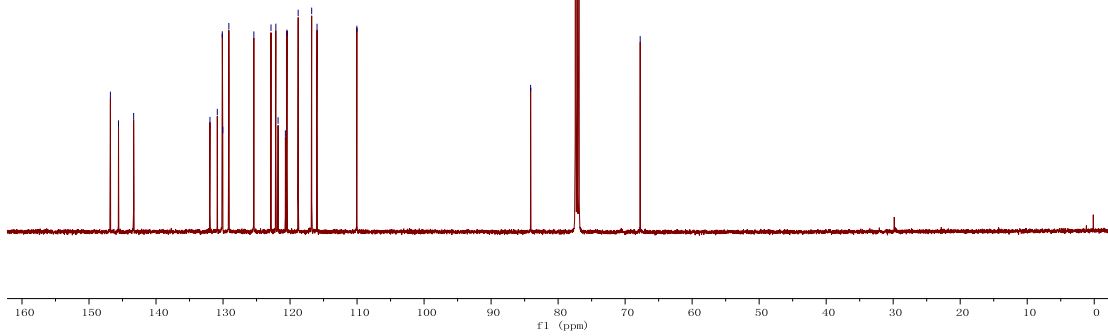

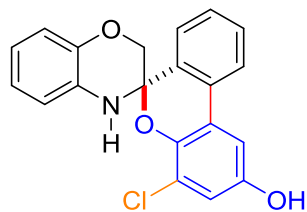

(±)-4'-chloro-2H,4H-spiro[benzo[*b*][1,4]oxazine-3,6'-benzo[*c*]chromen]-2'-ol

Compound **3y'**: a yellow oil. Column chromatography, eluent: Petroleum/EtOAc = 4/1,  $R_f = 0.24$ , 11 mg, 31% yield.

$^1\text{H NMR}$  (500 MHz, acetone- $d_6$ )  $\delta$  8.55 (s, 1H), 7.86 (d,  $J = 7.5$  Hz, 1H), 7.62 (dd,  $J = 7.5, 1.5$  Hz, 1H), 7.54 (td,  $J = 7.5, 1.5$  Hz, 1H), 7.48 (td,  $J = 7.5, 1.5$  Hz, 1H), 7.31 (d,  $J = 3.0$  Hz, 1H), 6.91-6.89 (m, 1H), 6.88 (d,  $J = 2.5$  Hz, 1H), 6.84-6.81 (m, 2H), 6.72 (td,  $J = 7.5, 1.5$  Hz, 1H), 6.59 (broad, 1H), 4.34 (dd,  $J = 11.5, 2.5$  Hz, 1H), 3.85 (d,  $J = 11.5$  Hz, 1H).

$^{13}\text{C NMR}$  (125 MHz, acetone- $d_6$ )  $\delta$  153.0, 144.3, 142.0, 133.3, 132.7, 131.1, 130.6, 129.9, 126.3, 124.7, 124.0, 123.8, 122.3, 120.0, 117.9, 116.8, 116.6, 109.4, 85.4, 68.1.

**IR (KBr)**  $\nu(\text{cm}^{-1})$ : 3361, 2922, 1690, 1500, 1432, 1310, 1211, 1060, 940, 857  $\text{cm}^{-1}$ .

**HRMS (ESI)** calcd. for  $[\text{C}_{20}\text{H}_{14}\text{ClNO}_3+\text{H}]^+$  requires 352.07350, found 352.07343  $[\text{M}+\text{H}]^+$ .

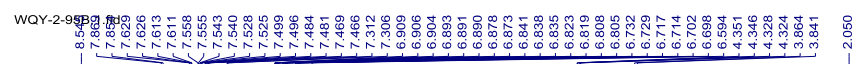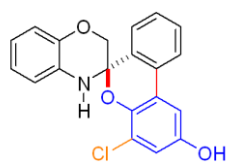

$^1\text{H NMR}$ , 500 MHz, acetone- $d_6$

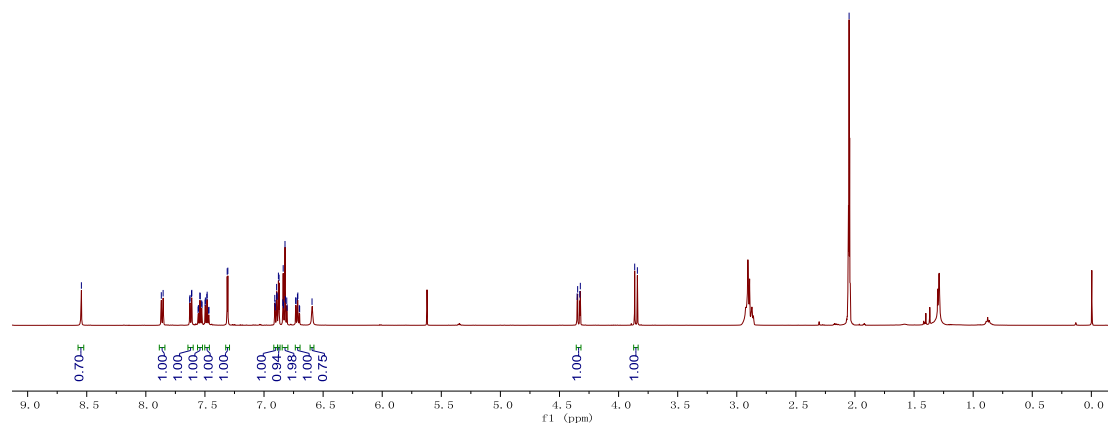



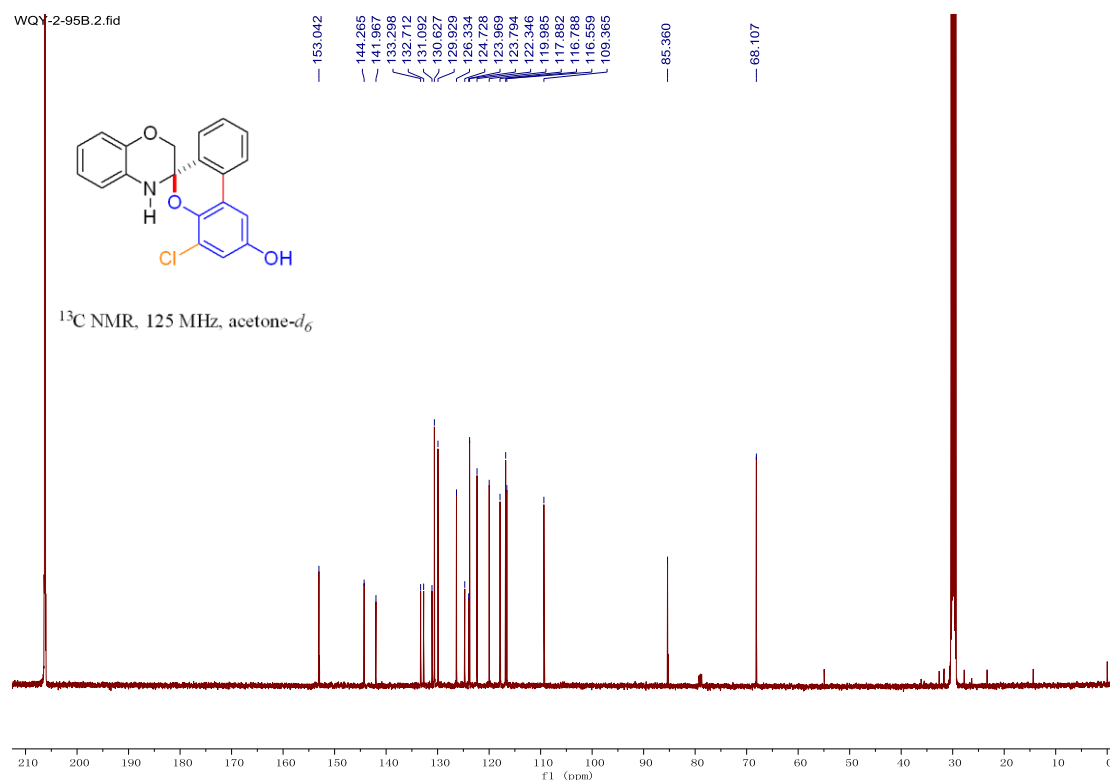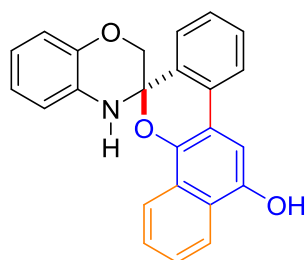

(±)-2*H*,4*H*-spiro[benzo[*b*][1,4]oxazine-3,6'-dibenzo[*c,h*]chromen]-12'-ol

Compound **3z**: a white solid. Column chromatography, eluent: Petroleum/CH<sub>2</sub>Cl<sub>2</sub> = 1/1, R<sub>f</sub> = 0.5, 29.5 mg, 80% yield. m.p. 114-120 °C.

<sup>1</sup>H NMR (500 MHz, CDCl<sub>3</sub>, TMS) δ 8.11-8.07 (m, 2H), 7.72 (d, *J* = 8.0 Hz, 1H), 7.57 (dd, *J* = 7.5, 1.5 Hz, 1H), 7.52-7.47 (m, 2H), 7.45-7.38 (m, 2H), 7.19 (s, 1H), 6.96-6.90 (m, 2H), 6.85 (td, *J* = 7.5, 1.5 Hz, 1H), 6.81 (dd, *J* = 7.5, 1.5 Hz, 1H), 5.13-5.12 (m, 1H), 4.93 (broad, 1H), 4.48 (dd, *J* = 11.5, 2.0 Hz, 1H), 3.89 (d, *J* = 11.0 Hz, 1H).

<sup>13</sup>C NMR (125 MHz, CDCl<sub>3</sub>) δ 146.5, 143.7, 141.6, 131.7, 131.3, 131.2, 130.0, 128.4, 127.0, 126.9, 126.6, 125.7, 125.4, 122.8, 122.5, 121.9, 121.5, 120.3, 116.7, 116.1, 115.2, 102.9, 84.4, 67.7.

IR (KBr) ν (cm<sup>-1</sup>): 3367, 1597, 1500, 1389, 1277, 1230, 1211, 1061, 1049, 760 cm<sup>-1</sup>.

HRMS (ESI) calcd. for  $[C_{24}H_{17}NO_3+H]^+$  requires 368.12812, found 368.12762

$[M+H]^+$ .

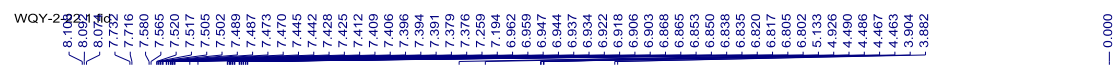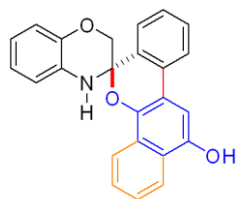

$^1H$  NMR, 500 MHz,  $CDCl_3$

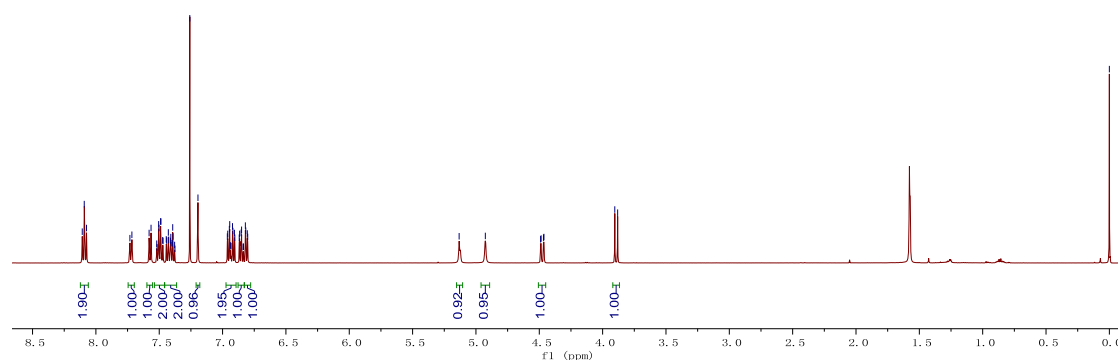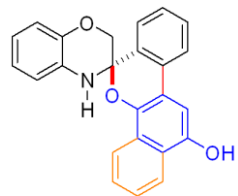

$^{13}C$  NMR, 125 MHz,  $CDCl_3$

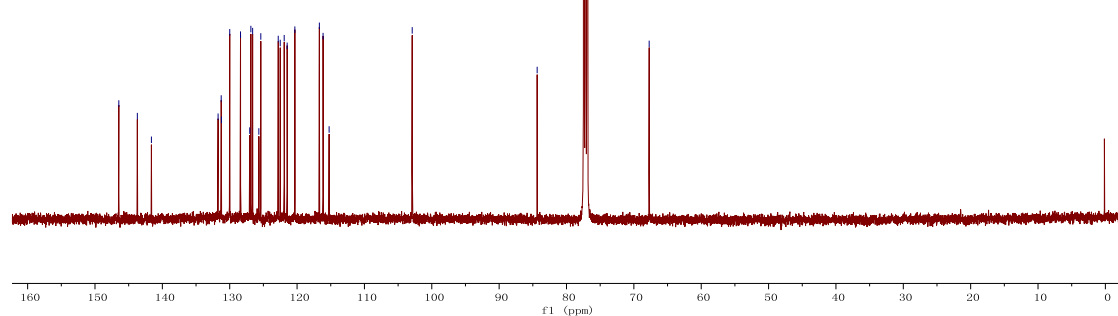

## (E) Derivatization of the Products.

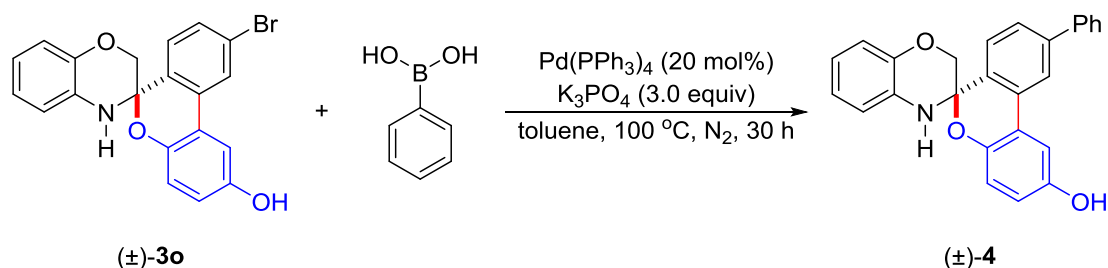

An oven dried reaction tube, fitted with a magnetic stirrer, was charged with  $\text{PhB(OH)}_2$  (61 mg, 0.5 mmol, 2.0 equiv),  $\text{Pd(PPh}_3)_4$  (58 mg, 0.05 mmol, 20 mol%),  $\text{K}_3\text{PO}_4$  (160 mg, 0.75 mmol, 3.0 equiv), substrate **(±)-3o** (99 mg, 0.25 mmol). The tube was fitted with a rubber septum and purged with nitrogen. The tube was evacuated and backfilled with nitrogen 3 times. Toluene (5.0 mL) was added by syringe under nitrogen atmosphere. The tube was sealed and the reaction was at 100 °C for 30 h. The mixture was cooled to room temperature and concentrated in vacuum. The residue was purified by flash column chromatography (petroleum ether/EtOAc, 5/1) to afford **(±)-4** (90.0 mg, 92%).

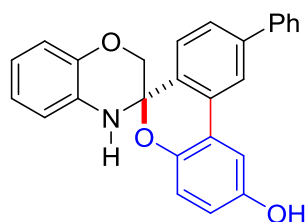

**(±)-9'-Phenyl-2H,4H-spiro[benzo[*b*][1,4]oxazine-3,6'-benzo[*c*]chromen]-2'-ol**

Compound **4**: a white solid. Column chromatography, eluent: Petroleum/EtOAc = 5/1,  $R_f = 0.3$ , 90.0 mg, 92% yield. m.p. 85-87 °C.

**$^1\text{H NMR}$**  (500 MHz, acetone- $d_6$ )  $\delta$  8.14 (s, 1H), 8.08 (d,  $J = 2.0$  Hz, 1H), 7.80-7.78 (m, 2H), 7.72-7.69 (m, 1H), 7.67-7.65 (m, 1H), 7.53-7.49 (m, 3H), 7.44-7.40 (m, 1H), 6.92 (dd,  $J = 8.0, 1.5$  Hz, 1H), 6.85-6.79 (m, 4H), 6.74-6.71 (m, 1H), 6.52 (s, 1H), 4.39 (dd,  $J = 11.5, 2.5$  Hz, 1H), 3.87 (d,  $J = 11.0$  Hz, 1H).

**$^{13}\text{C NMR}$**  (125 MHz, acetone- $d_6$ )  $\delta$  153.3, 146.1, 144.1, 143.1, 141.1, 133.0, 132.2, 129.8, 128.7, 127.9, 127.8, 127.0, 123.0, 122.4, 121.7, 119.8, 119.6, 117.9, 116.8, 116.5, 110.3, 84.2, 68.2.

IR (KBr)  $\nu(\text{cm}^{-1})$ : 3358, 2923, 1611, 1500, 1311, 1212, 1061, 943, 857, 744  $\text{cm}^{-1}$ .

HRMS (ESI) calcd. for  $[\text{C}_{26}\text{H}_{19}\text{NO}_3+\text{H}]^+$  requires 394.14377, found 394.14139

$[\text{M}+\text{H}]^+$ .

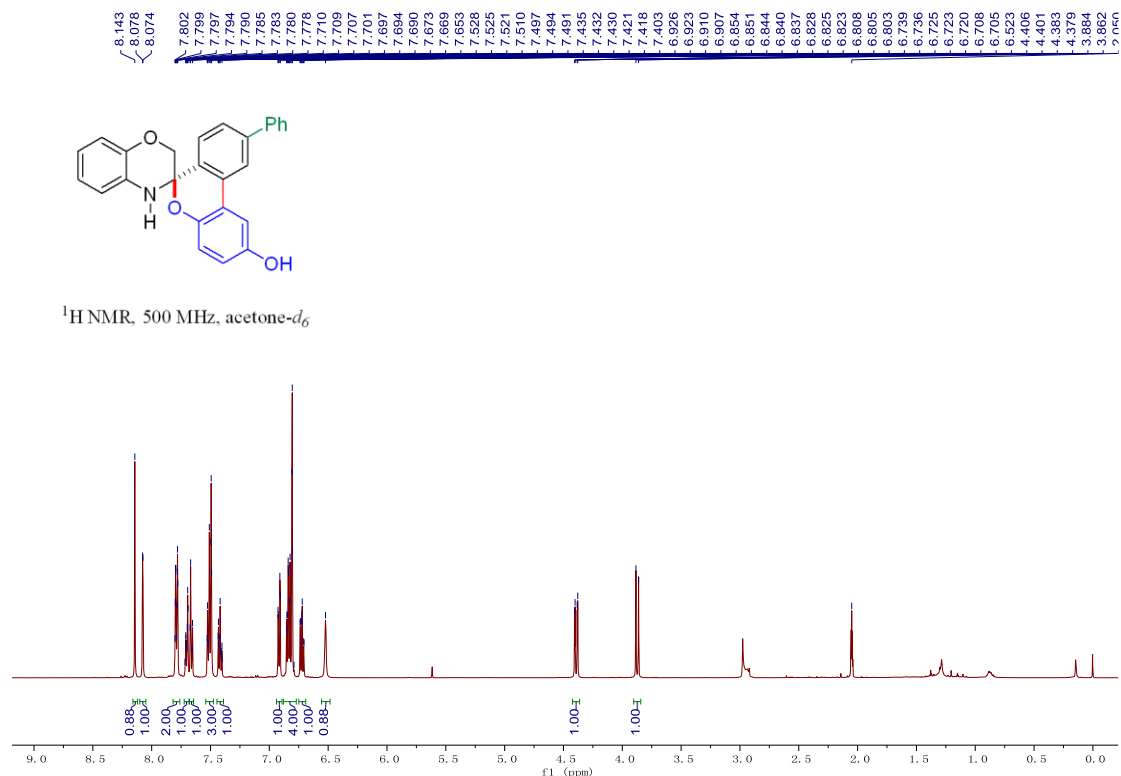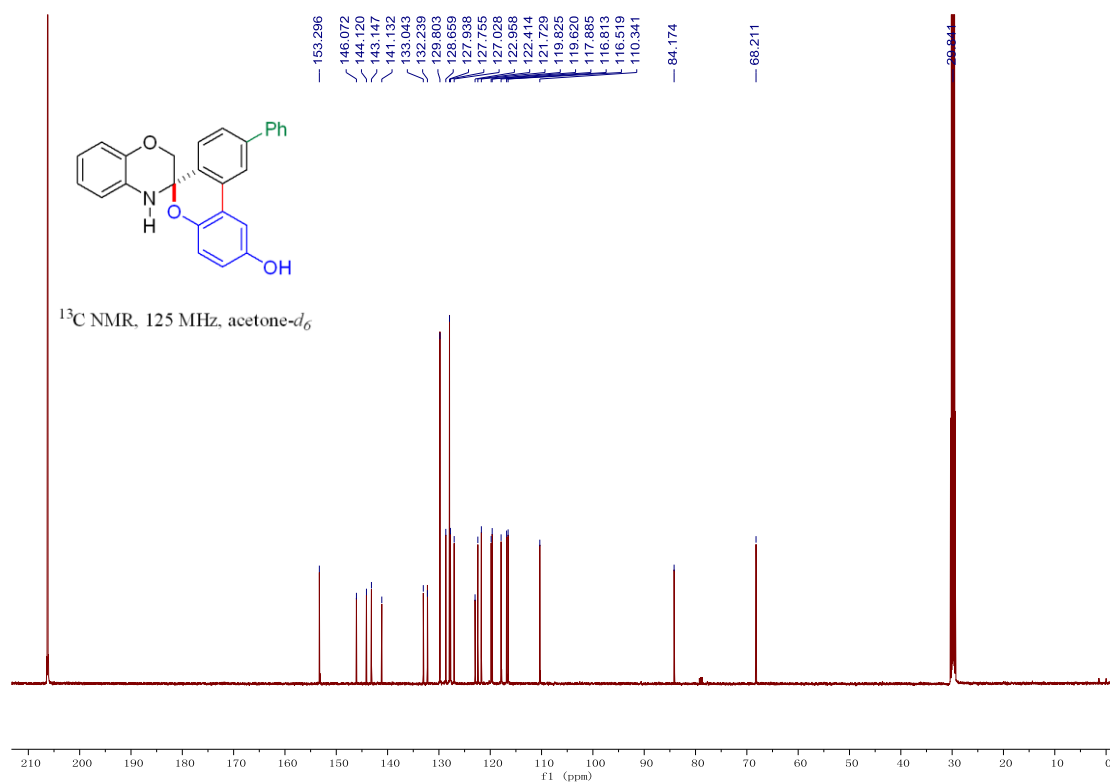

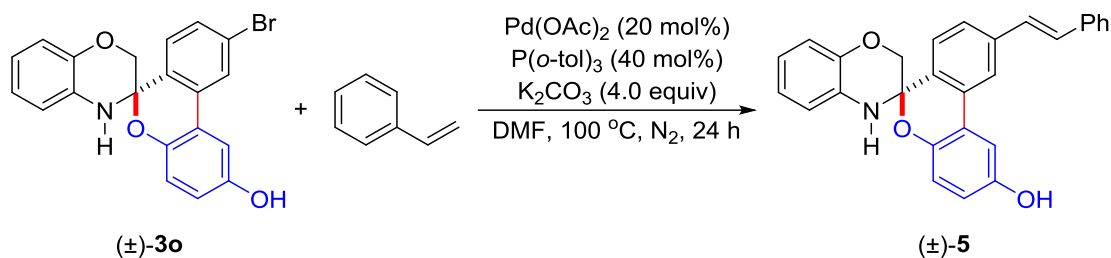

An oven dried reaction tube, fitted with a magnetic stirrer, was charged with  $\text{P}(o\text{-tol})_3$  (30.0 mg, 0.1 mmol, 40 mol%),  $\text{Pd(OAc)}_2$  (11.2 mg, 0.05 mmol, 20 mol%),  $\text{K}_2\text{CO}_3$  (138 mg, 1.0 mmol, 4.0 equiv), substrate (±)-**3o** (99 mg, 0.25 mmol). The tube was fitted with a rubber septum and purged with nitrogen. The tube was evacuated and backfilled with nitrogen 3 times. DMF (5.0 mL) and  $\text{PhCH=CH}_2$  (287  $\mu\text{L}$ , 2.5 mmol, 10.0 equiv) was added by syringe under nitrogen atmosphere. The tube was sealed and the reaction was at 100 °C for 24 h. The mixture was cooled to room temperature and concentrated in vacuum. The residue was purified by flash column chromatography (petroleum ether/EtOAc, 8/1) to afford (±)-**5** (36.4 mg, 35%).

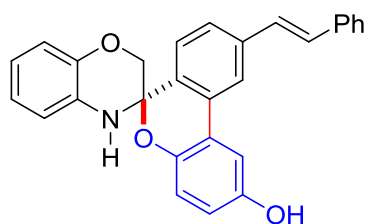

(±)-(*E*)-9'-Styryl-2*H*,4*H*-spiro[benzo[*b*][1,4]oxazine-3,6'-benzo[*c*]chromen]-2'-ol

Compound **5**: a colorless solid. Column chromatography, eluent: Petroleum/EtOAc = 8/1,  $R_f = 0.1$ , 36.4 mg, 35% yield.

$^1\text{H NMR}$  (500 MHz, acetone- $d_6$ )  $\delta$  8.24-8.22 (m, 1H), 8.08 (s, 1H), 7.67-7.65 (m, 3H), 7.58 (d,  $J = 8.0$  Hz, 1H), 7.49-7.43 (m, 2H), 7.42-7.33 (m, 3H), 7.32-7.28 (m, 1H), 6.92-6.90 (m, 1H), 6.85-6.78 (m, 4H), 6.73-6.69 (m, 1H), 6.50 (broad, 1H), 4.36 (dd,  $J = 11.0, 2.0$  Hz, 1H), 3.84 (d,  $J = 11.0$  Hz, 1H).

$^{13}\text{C NMR}$  (125 MHz, acetone- $d_6$ )  $\delta$  153.3, 146.0, 144.1, 139.7, 138.2, 133.1, 132.4, 132.1, 130.7, 129.6, 128.71, 128.67, 127.5, 127.2, 126.8, 122.9, 122.4, 121.3, 119.82, 119.80, 119.6, 117.8, 116.8, 116.51, 116.48, 110.3, 84.2, 68.2.

**IR (KBr)**  $\nu(\text{cm}^{-1})$ : 3352, 1690, 1609, 1501, 1431, 1312, 1277, 1254, 1211, 748  $\text{cm}^{-1}$ .

HRMS (ESI) calcd. for  $[C_{28}H_{21}NO_3+H]^+$  requires 420.15942, found 420.15933  
 $[M+H]^+$ .

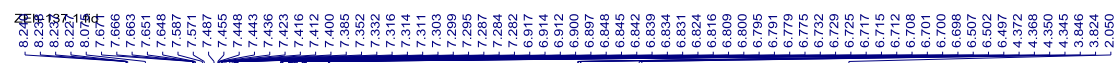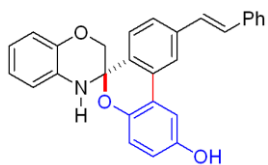

$^1H$  NMR, 500 MHz, acetone- $d_6$

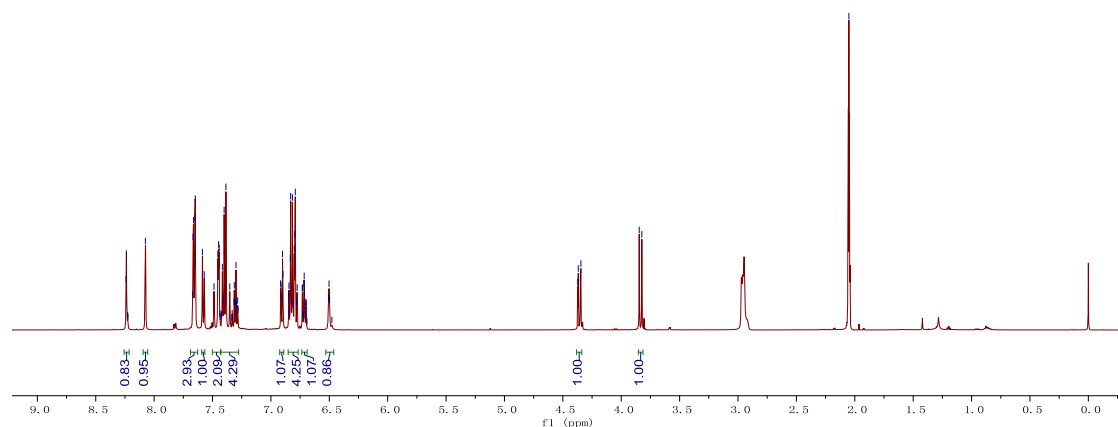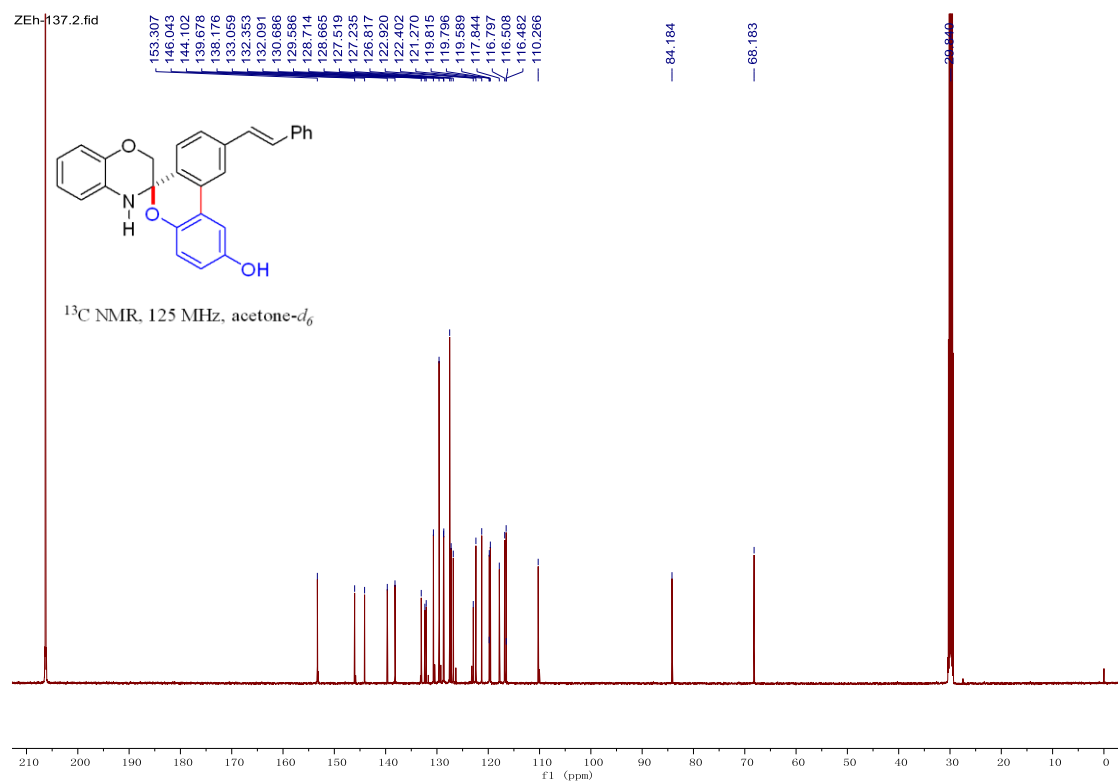

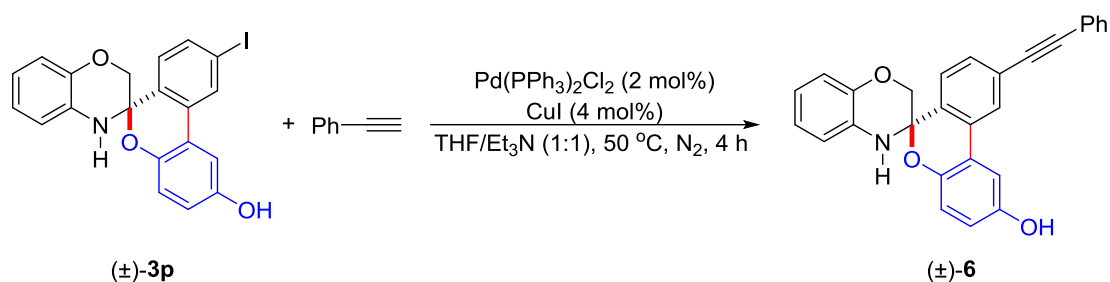

An oven dried reaction tube, fitted with a magnetic stirrer, was charged with Pd(PPh<sub>3</sub>)<sub>2</sub>Cl<sub>2</sub> (0.7 mg, 2 mol%), CuI (0.4 mg, 4 mol%), substrate (±)-**3p** (22.0 mg, 0.05 mmol). The tube was fitted with a rubber septum and purged with nitrogen. The tube was evacuated and backfilled with nitrogen 3 times. THF (0.5 mL), Et<sub>3</sub>N (0.5 mL) and PhC≡CH (11 μL, 0.1 mmol, 2.0 equiv) was added by syringe under nitrogen atmosphere. The tube was sealed and the reaction was at 50 °C for 4 h. The mixture was cooled to room temperature and concentrated in vacuum. The residue was purified by flash column chromatography (petroleum ether/EtOAc, 5/1) to afford (±)-**6** (18.1 mg, 87%).

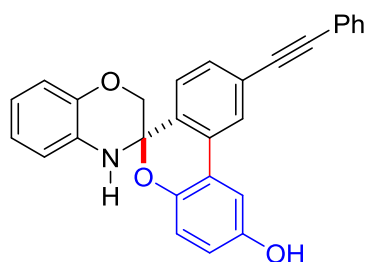

(±)-9'-(Phenylethynyl)-2*H*,4*H*-spiro[benzo[*b*][1,4]oxazine-3,6'-benzo[*c*]chromen]-2'-ol

Compound **6**: a yellow oil. Column chromatography, eluent: Petroleum/EtOAc = 5/1, R<sub>f</sub> = 0.1. 18.1 mg, 87% yield.

<sup>1</sup>H NMR (500 MHz, CDCl<sub>3</sub>, TMS) δ 7.81 (s, 1H), 7.58-7.55 (m, 2H), 7.50-7.45 (m, 2H), 7.39-7.36 (m, 3H), 7.19-7.18 (m, 1H), 6.93 (d, *J* = 8.0 Hz, 1H), 6.90-6.86 (m, 2H), 6.81 (td, *J* = 8.0, 1.5 Hz, 1H), 6.74-6.71 (m, 2H), 5.01-4.94 (m, 1H), 4.82 (s, 1H), 4.37 (dd, *J* = 11.0, 2.5 Hz, 1H), 3.82 (d, *J* = 11.0 Hz, 1H).

<sup>13</sup>C NMR (125 MHz, CDCl<sub>3</sub>) δ 150.9, 145.71, 145.69, 143.3, 131.9, 131.7, 130.95, 130.89, 128.8, 128.6, 125.7, 125.5, 125.0, 122.9, 122.2, 121.5, 120.4, 119.6, 117.7, 116.7, 116.1, 109.7, 90.8, 88.8, 83.7, 67.6.

IR (KBr)  $\nu(\text{cm}^{-1})$ : 3341, 1609, 1501, 1435, 1285, 1207, 1049, 860, 756, 691  $\text{cm}^{-1}$ .

HRMS (ESI) calcd. for  $[\text{C}_{28}\text{H}_{19}\text{NO}_3+\text{H}]^+$  requires 418.14377, found 418.14362

$[\text{M}+\text{H}]^+$ .

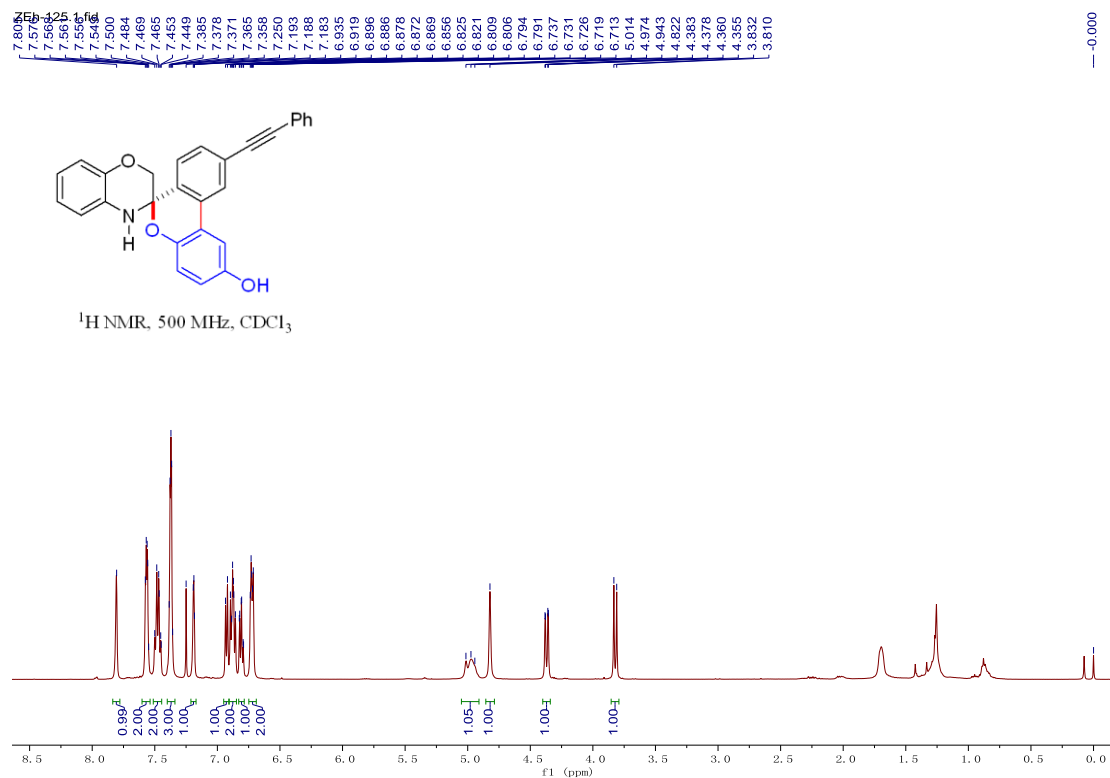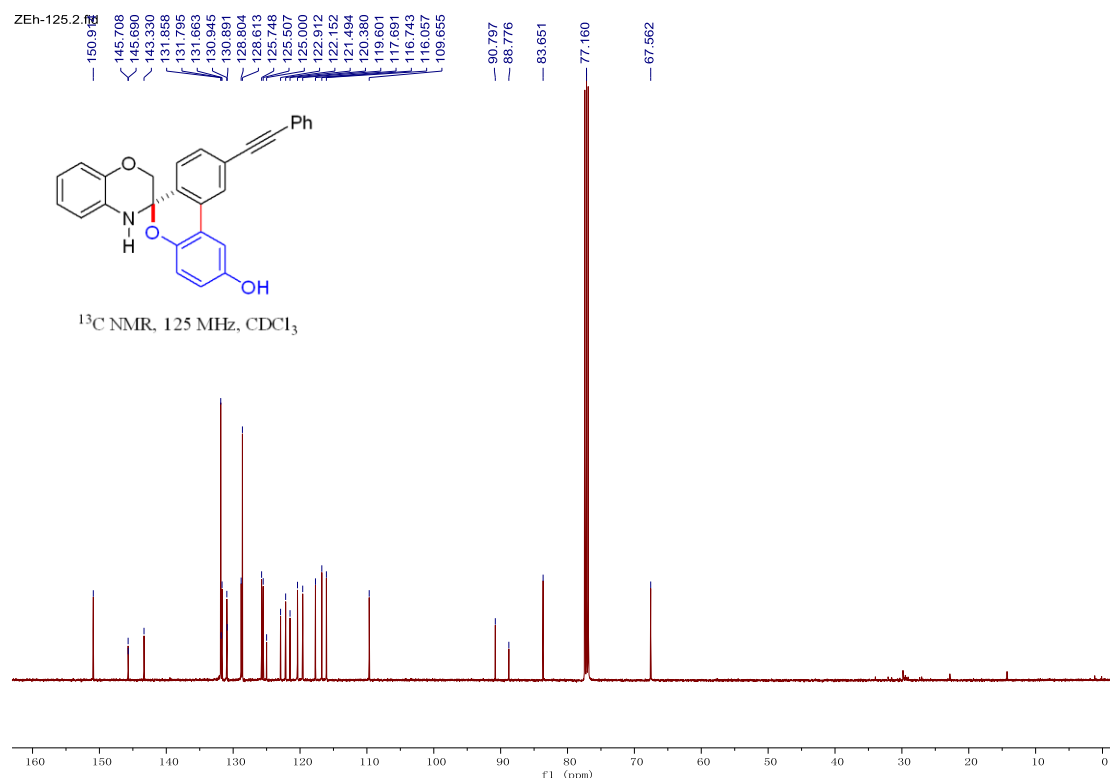



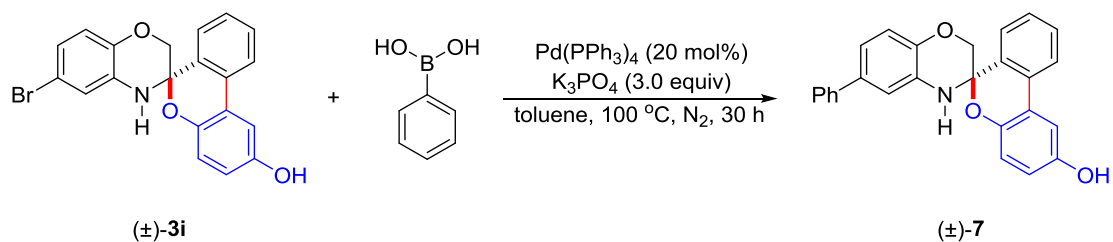

An oven dried reaction tube, fitted with a magnetic stirrer, was charged with  $\text{PhB(OH)}_2$  (61 mg, 0.5 mmol, 2.0 equiv),  $\text{Pd(PPh}_3)_4$  (58 mg, 0.05 mmol, 20 mol%),  $\text{K}_3\text{PO}_4$  (160 mg, 0.75 mmol, 3.0 equiv), substrate  $(\pm)\text{-3i}$  (99 mg, 0.25 mmol). The tube was fitted with a rubber septum and purged with nitrogen. The tube was evacuated and backfilled with nitrogen 3 times. Toluene (5.0 mL) was added by syringe under nitrogen atmosphere. The tube was sealed and the reaction was at 100 °C for 30 h. The mixture was cooled to room temperature and concentrated in vacuum. The residue was purified by flash column chromatography (petroleum ether/EtOAc, 5/1) to afford  $(\pm)\text{-7}$  (32.0 mg, 33%).

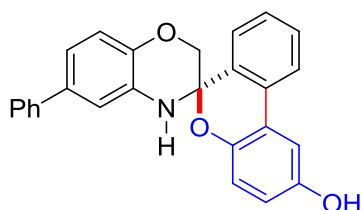

$(\pm)\text{-6-Phenyl-2H,4H-spiro[benzo[}b\text{][1,4]oxazine-3,6'-benzo[}c\text{]chromen]-2'-ol}$

Compound **7**: a white solid. Column chromatography, eluent: Petroleum/EtOAc = 5/1,  $R_f = 0.2$ , 32.0 mg, 33% yield. m.p. 109-111 °C.

$^1\text{H NMR}$  (600 MHz,  $\text{CDCl}_3$ , TMS)  $\delta$  7.68-7.66 (m, 1H), 7.52-7.51 (m, 3H), 7.47-7.43 (m, 1H), 7.41-7.36 (m, 3H), 7.31-7.28 (m, 1H), 7.20 (d,  $J = 1.2$  Hz, 1H), 7.02 (dd,  $J = 8.4, 1.8$  Hz, 1H), 6.98 (d,  $J = 7.8$  Hz, 1H), 6.95-6.94 (m, 1H), 6.90 (d,  $J = 8.4$  Hz, 1H), 6.72-6.69 (m, 1H), 4.98-4.90 (m, 2H), 4.41 (dd,  $J = 11.4, 1.8$  Hz, 1H), 3.87 (d,  $J = 11.4$  Hz, 1H).

$^{13}\text{C NMR}$  (150 MHz,  $\text{CDCl}_3$ )  $\delta$  150.8, 145.6, 143.0, 141.1, 135.4, 132.0, 131.2, 130.6, 130.0, 128.9, 128.8, 127.0, 126.9, 125.3, 122.7, 122.3, 119.5, 119.2, 117.3, 117.0, 114.6, 109.6, 83.7, 67.9.

**IR (KBr)**  $\nu(\text{cm}^{-1})$ : 3368, 1489, 1443, 1315, 1242, 1200, 1053, 945, 856, 763  $\text{cm}^{-1}$ .

HRMS (ESI) calcd. for  $[C_{26}H_{19}NO_3+H]^+$  requires 394.14377, found 394.14371  
 $[M+H]^+$ .

7.677  
7.669  
7.665  
7.659  
7.655  
7.524  
7.521  
7.511  
7.509  
7.507  
7.485  
7.482  
7.459  
7.452  
7.449  
7.447  
7.439  
7.436  
7.434  
7.405  
7.402  
7.382  
7.385  
7.362  
7.352  
7.374  
7.372  
7.370  
7.362  
7.359  
7.357  
7.309  
7.307  
7.304  
7.297  
7.294  
7.291  
7.284  
7.282  
7.280  
7.204  
7.202  
7.030  
7.027  
7.016  
7.013  
6.989  
6.976  
6.952  
6.949  
6.946  
6.944  
6.910  
6.896  
6.716  
6.713  
6.711  
6.708  
6.706  
6.698  
6.696  
6.693  
6.691  
6.687  
4.904  
4.420  
4.417  
4.401  
4.398  
3.883  
0.000



$^1H$  NMR, 600 MHz,  $CDCl_3$



ZEH-60.2.fid  
 150.817  
 145.882  
 142.864  
 141.079  
 135.447  
 131.995  
 131.212  
 130.642  
 129.883  
 128.855  
 128.789  
 128.856  
 128.904  
 128.904  
 122.726  
 122.266  
 119.517  
 119.200  
 117.253  
 116.993  
 114.640  
 109.600  
 83.713  
 77.160  
 67.878



$^{13}C$  NMR, 150 MHz,  $CDCl_3$



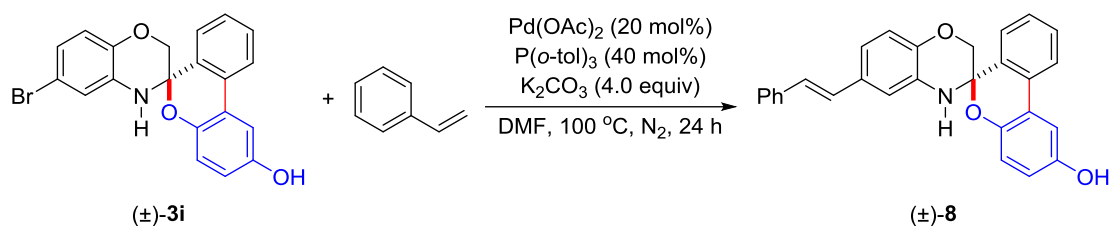

An oven dried reaction tube, fitted with a magnetic stirrer, was charged with  $\text{P}(o\text{-tol})_3$  (30.0 mg, 0.1 mmol, 40 mol%),  $\text{Pd(OAc)}_2$  (11.2 mg, 0.05 mmol, 20 mol%),  $\text{K}_2\text{CO}_3$  (138 mg, 1.0 mmol, 4.0 equiv), substrate ( $\pm$ )-**3i** (99 mg, 0.25 mmol). The tube was fitted with a rubber septum and purged with nitrogen. The tube was evacuated and backfilled with nitrogen 3 times. DMF (5.0 mL) and  $\text{PhCH}=\text{CH}_2$  (287  $\mu\text{L}$ , 2.5 mmol, 10.0 equiv) was added by syringe under nitrogen atmosphere. The tube was sealed and the reaction was at 100 °C for 24 h. The mixture was cooled to room temperature and concentrated in vacuum. The residue was purified by flash column chromatography (petroleum ether/EtOAc, 5/1) to afford ( $\pm$ )-**8** (70.0 mg, 66%).

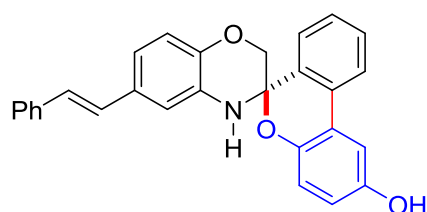

(*E*)-6-Styryl-2*H*,4*H*-spiro[benzo[*b*][1,4]oxazine-3,6'-benzo[*c*]chromen]-2'-ol

Compound **8**: a blue oil. Column chromatography, eluent: Petroleum/EtOAc = 5/1,  $R_f$  = 0.3, 70.0 mg, 66% yield.

$^1\text{H NMR}$  (500 MHz, acetone- $d_6$ )  $\delta$  8.22 (s, 1H), 7.84 (d,  $J$  = 8.0 Hz, 1H), 7.61 (d,  $J$  = 7.5 Hz, 1H), 7.56-7.50 (m, 3H), 7.44 (t,  $J$  = 7.5 Hz, 1H), 7.36-7.33 (m, 3H), 7.24-7.21 (m, 1H), 7.17-7.14 (m, 2H), 7.04 (d,  $J$  = 16.5 Hz, 1H), 6.99 (dd,  $J$  = 8.5, 2.0 Hz, 1H), 6.84 (d,  $J$  = 8.5 Hz, 1H), 6.81-6.78 (m, 2H), 6.54 (s, 1H), 4.38 (dd,  $J$  = 11.5, 2.0 Hz, 1H), 3.87 (d,  $J$  = 11.5 Hz, 1H).

$^{13}\text{C NMR}$  (125 MHz, acetone- $d_6$ )  $\delta$  153.3, 145.8, 144.2, 138.7, 133.2, 133.1, 132.1, 131.7, 130.5, 129.54, 129.46, 129.3, 127.9, 127.1, 127.0, 126.3, 123.3, 123.0, 119.6, 118.9, 117.8, 117.0, 114.2, 110.1, 84.1, 68.4.

**IR (KBr)**  $\nu(\text{cm}^{-1})$ : 3364, 1593, 1493, 1443, 1296, 1250, 1211, 1053, 961, 856  $\text{cm}^{-1}$ .

HRMS (ESI) calcd. for  $[C_{28}H_{21}NO_3+H]^+$  requires 420.15942, found 420.15924

$[M+H]^+$ .

ZEh-128a.2.fid  
8.216  
7.845  
7.829  
7.618  
7.603  
7.558  
7.541  
7.534  
7.531  
7.519  
7.516  
7.503  
7.499  
7.453  
7.438  
7.423  
7.364  
7.358  
7.353  
7.350  
7.347  
7.343  
7.330  
7.327  
7.242  
7.240  
7.237  
7.229  
7.225  
7.222  
7.213  
7.210  
7.210  
7.169  
7.165  
7.161  
7.136  
7.057  
7.024  
7.024  
6.996  
6.983  
6.979  
6.847  
6.830  
6.807  
6.795  
6.792  
6.790  
6.783  
6.536  
4.393  
4.389  
4.371  
4.367  
3.885  
3.862  
2.050

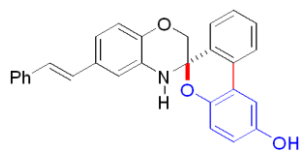

$^1H$  NMR, 500 MHz, acetone- $d_6$

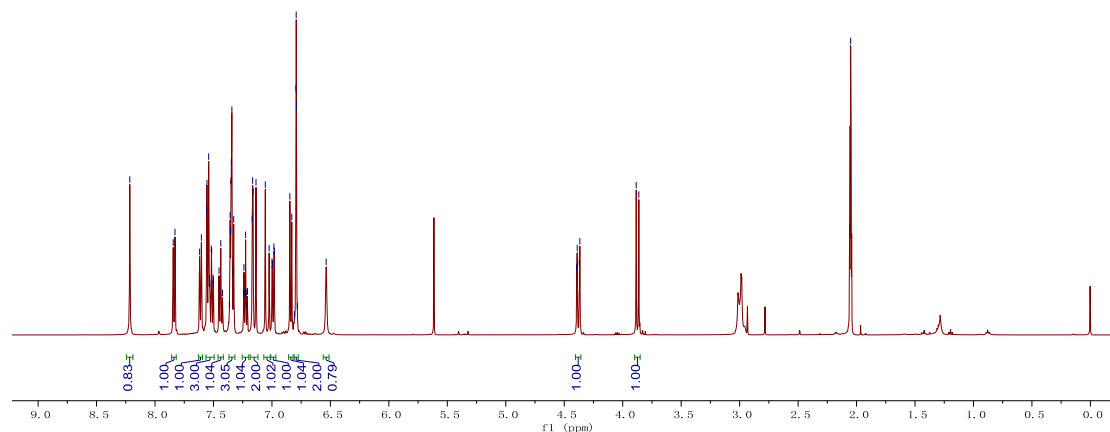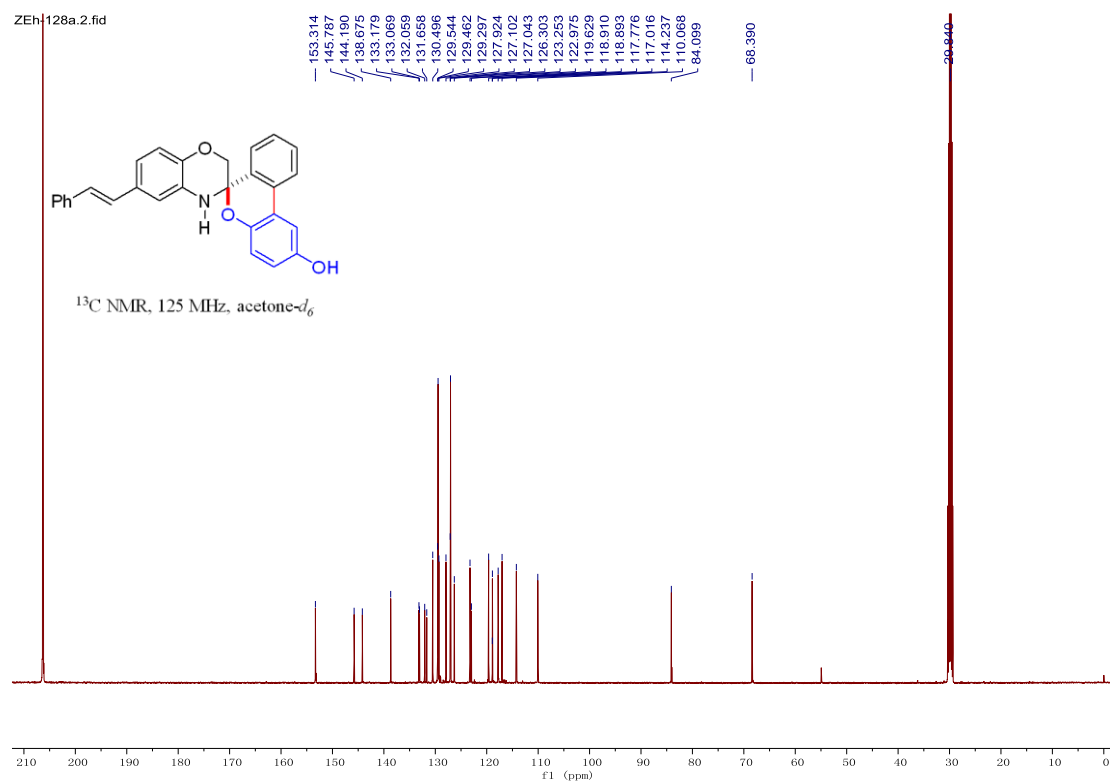

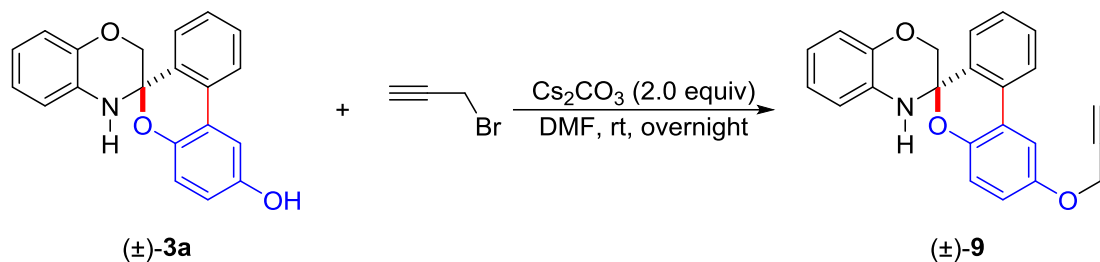

(±)-**3a** (381 mg, 1.2 mmol), Cs<sub>2</sub>CO<sub>3</sub> (782 mg, 2.4 mmol), and DMF (10 mL) were added to a 50 mL round bottom flask. 3-Bromopropyne (207 μL, 2.4 mmol) was added slowly to the reaction mixture. The reaction mixture was stirred at room temperature overnight. The mixture was concentrated in vacuum. The residue was purified by flash column chromatography (petroleum ether/EtOAc, 5/1) to afford (±)-**9** (313 mg, 73%).

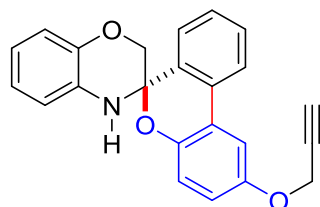

(±)-2'-(Prop-2-yn-1-yloxy)-2*H*,4*H*-spiro[benzo[*b*][1,4]oxazine-3,6'-benzo[*c*]chromene]

Compound **9**: a yellow oil. Column chromatography, eluent: Petroleum/EtOAc = 5/1, R<sub>f</sub> = 0.6. 313 mg, 73% yield.

<sup>1</sup>H NMR (600 MHz, CDCl<sub>3</sub>, TMS) δ 7.73 (d, *J* = 7.8 Hz, 1H), 7.51 (d, *J* = 7.8 Hz, 1H), 7.48 (td, *J* = 7.2, 1.2 Hz, 1H), 7.40-7.37 (m, 2H), 6.97 (d, *J* = 8.4 Hz, 1H), 6.92 (dd, *J* = 7.8, 1.2 Hz, 1H), 6.90-6.86 (m, 2H), 6.81 (td, *J* = 7.8, 1.8 Hz, 1H), 6.75-6.73 (m, 1H), 4.80 (s, 1H), 4.71 (d, *J* = 2.4 Hz, 2H), 4.38 (dd, *J* = 11.4, 2.4 Hz, 1H), 3.85 (d, *J* = 11.4 Hz, 1H), 2.55 (t, *J* = 2.4 Hz, 1H).

<sup>13</sup>C NMR (125 MHz, CDCl<sub>3</sub>) δ 152.9, 146.4, 143.4, 132.1, 131.1, 130.7, 130.0, 128.8, 125.3, 122.7, 122.1, 122.0, 120.3, 119.4, 116.8, 116.7, 116.0, 109.9, 83.7, 78.8, 75.8, 67.8, 56.7.

IR (KBr) ν(cm<sup>-1</sup>): 3356, 3283, 2916, 1069, 1493, 1192, 1038, 941, 841, 748 cm<sup>-1</sup>.

HRMS (ESI) calcd. for [C<sub>23</sub>H<sub>17</sub>NO<sub>3</sub>+H]<sup>+</sup> requires 356.12812, found 356.12799 [M+H]<sup>+</sup>.

7.738  
7.729  
7.724  
7.709  
7.690  
7.490  
7.488  
7.478  
7.476  
7.465  
7.463  
7.395  
7.393  
7.391  
7.382  
7.370  
7.365  
7.248  
6.975  
6.961  
6.932  
6.930  
6.919  
6.917  
6.901  
6.897  
6.889  
6.887  
6.882  
6.877  
6.874  
6.864  
6.862  
6.821  
6.818  
6.808  
6.805  
6.795  
6.793  
6.746  
6.744  
6.742  
6.736  
6.735  
6.731  
6.729  
4.803  
4.713  
4.709  
4.393  
4.389  
4.374  
4.370  
3.863  
3.844  
2.556  
2.548

0.000

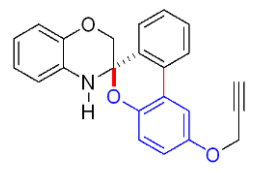

<sup>1</sup>H NMR, 600 MHz, CDCl<sub>3</sub>

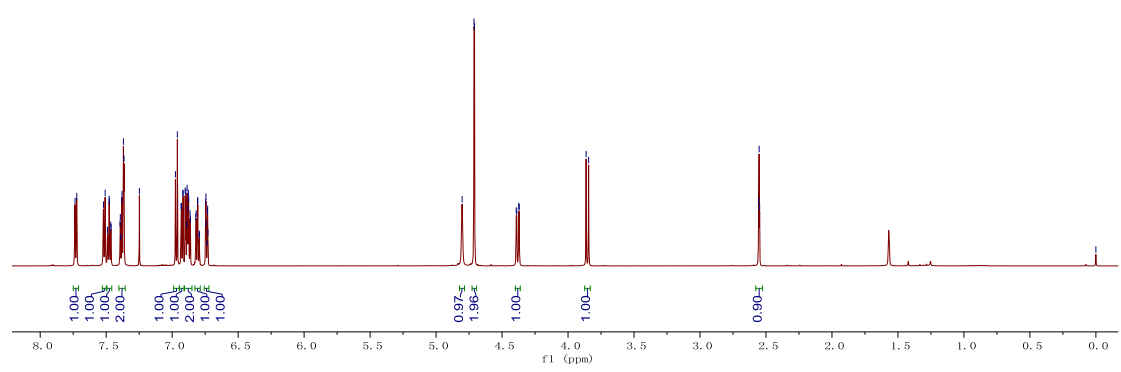

ZEH-129 id  
152.979  
146.448  
143.403  
132.111  
131.060  
129.663  
128.845  
128.323  
122.703  
122.121  
120.028  
120.275  
119.390  
116.848  
116.727  
115.958  
109.898

83.706  
78.838  
77.460  
75.810  
67.786  
56.731

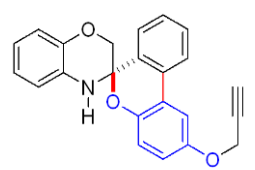

<sup>13</sup>C NMR, 150 MHz, CDCl<sub>3</sub>

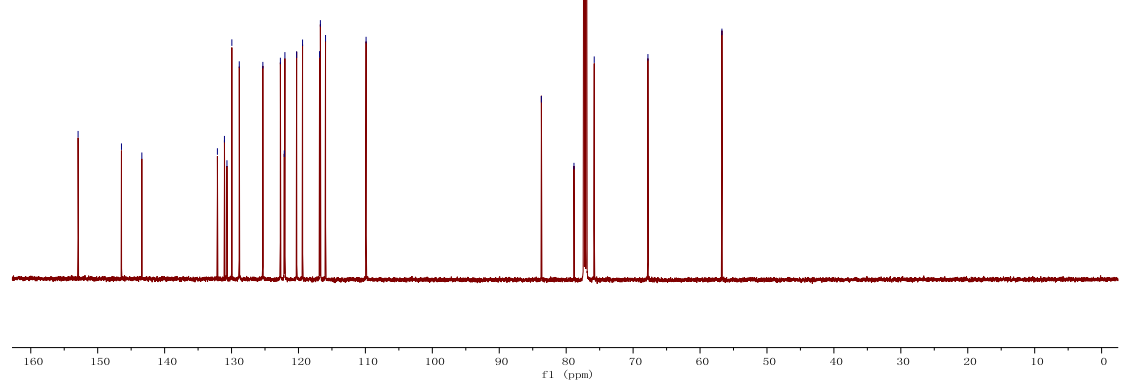

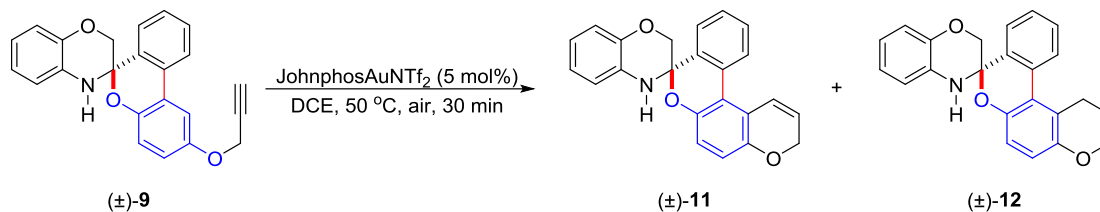

An oven dried reaction tube, fitted with a magnetic stirrer, was charged with JohnPhosAuNTf<sub>2</sub> (3.9 mg, 5 mol%), substrate (±)-**9** (35.5 mg, 0.1 mmol). DCE (1 mL) was added by syringe. The tube was sealed and the reaction was at 50 °C for 30 min. The mixture was cooled to room temperature and concentrated in vacuum. The residue was purified by flash column chromatography (petroleum ether/THF, 150/1) to afford (±)-**11** (18 mg, 51%) and (±)-**12** (8 mg, 23%).

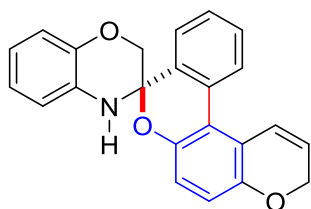

(±)-2*H*,3'*H*,4*H*-spiro[benzo[*b*][1,4]oxazine-3,8'-benzo[*c*]pyrano[3,2-*f*]chromene]

Compound **11**: a yellow oil. Column chromatography, eluent: Petroleum/THF = 150/1, R<sub>f</sub> = 0.1, 18 mg, 51% yield.

<sup>1</sup>H NMR (500 MHz, CDCl<sub>3</sub>, TMS) δ 7.65 (dd, *J* = 8.0, 1.5 Hz, 1H), 7.59 (dd, *J* = 7.5, 1.5 Hz, 1H), 7.48 (td, *J* = 7.5, 1.5 Hz, 1H), 7.41 (td, *J* = 7.5, 1.0 Hz, 1H), 6.95-6.91 (m, 2H), 6.90-6.86 (m, 2H), 6.82-6.79 (m, 2H), 6.74 (dd, *J* = 7.5, 1.5 Hz, 1H), 6.01-5.97 (m, 1H), 4.76-4.73 (m, 2H), 4.66-4.62 (m, 1H), 4.45 (dd, *J* = 11.5, 2.5 Hz, 1H), 3.95 (d, *J* = 11.5 Hz, 1H).

<sup>13</sup>C NMR (125 MHz, CDCl<sub>3</sub>) δ 150.5, 146.6, 143.6, 134.1, 131.0, 130.1, 129.2, 128.4, 127.8, 124.61, 124.59, 122.0, 121.2, 120.3, 119.6, 119.1, 119.0, 117.4, 116.7, 116.0, 83.4, 66.7, 64.0.

<sup>13</sup>C NMR (DEPT135°, 125 MHz, CDCl<sub>3</sub>) δ 129.1 (CH), 128.3 (CH), 127.7 (CH), 124.51 (CH), 124.49 (CH), 121.9 (CH), 121.1 (CH), 120.2 (CH), 118.9 (CH), 117.3 (CH), 116.6 (CH), 115.9 (CH), 66.6 (CH<sub>2</sub>), 63.9 (CH<sub>2</sub>).

IR (KBr) ν(cm<sup>-1</sup>): 3352, 1501, 1435, 1312, 1211, 1057, 991, 826, 748, 706 cm<sup>-1</sup>.

HRMS (ESI) calcd. for  $[C_{23}H_{17}NO_3+H]^+$  requires 356.12812, found 356.12796

$[M+H]^+$

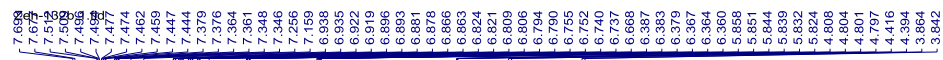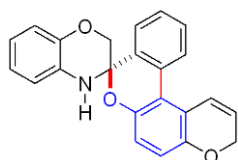

$^1H$  NMR, 500 MHz,  $CDCl_3$

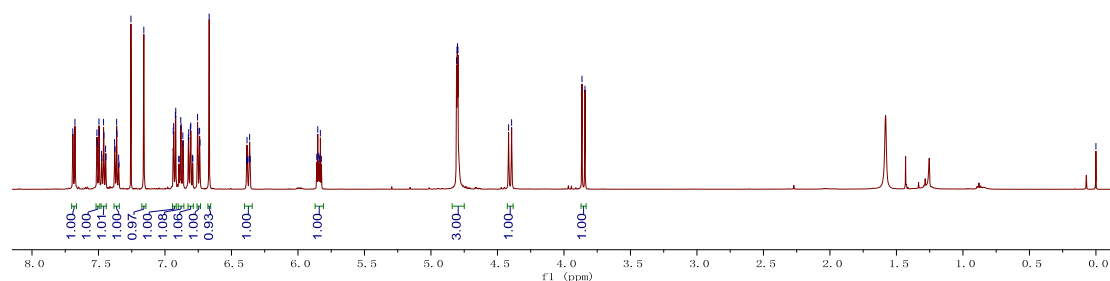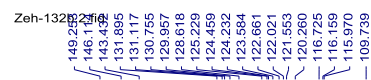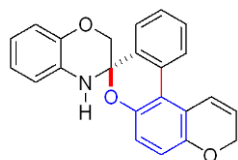

$^{13}C$  NMR, 125 MHz,  $CDCl_3$

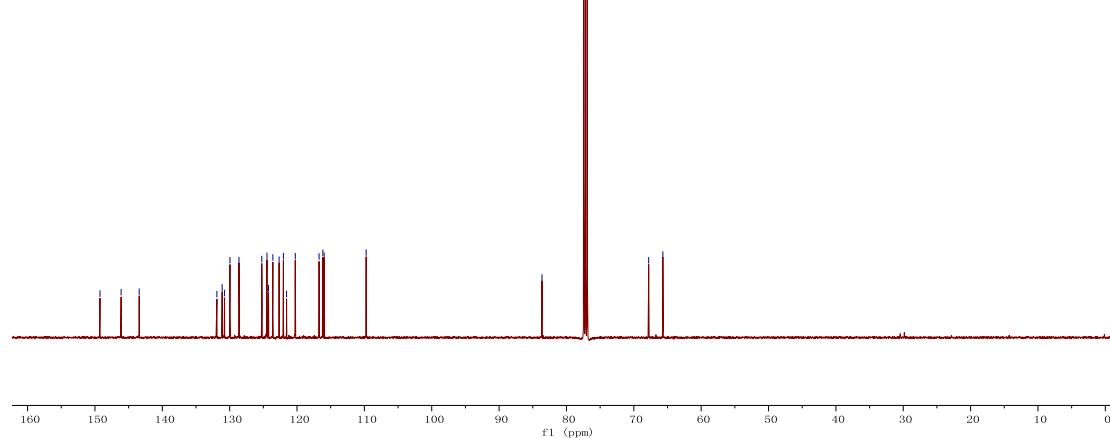



ZEH-132a.4.fid

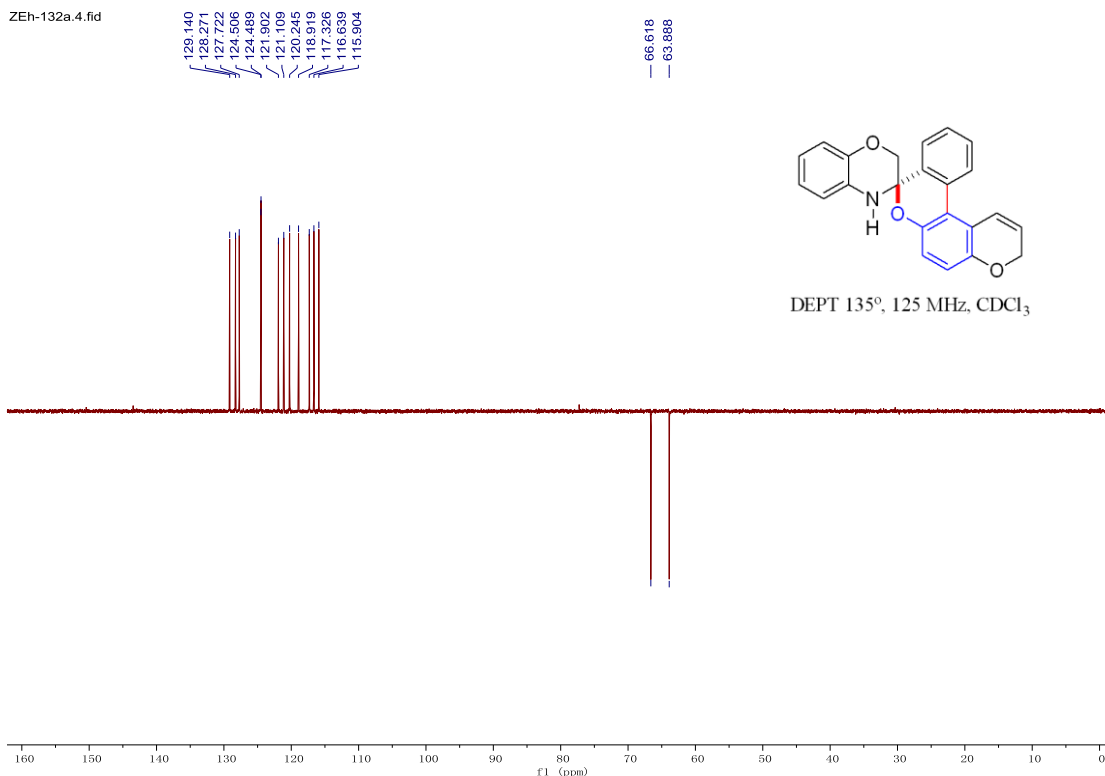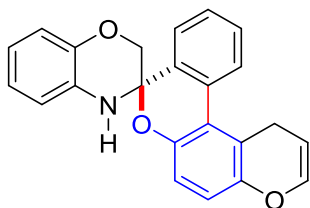

(±)-1'*H*,2*H*,4*H*-spiro[benzo[*b*][1,4]oxazine-3,8'-benzo[*c*]pyrano[3,2-*f*]chromene]

Compound **12**: a yellow oil. Column chromatography, eluent: Petroleum/THF = 150/1,  $R_f$  = 0.1, 8 mg, 23% yield.

<sup>1</sup>H NMR (500 MHz, CDCl<sub>3</sub>, TMS)  $\delta$  7.69 (d,  $J$  = 8.0 Hz, 1H), 7.50 (dd,  $J$  = 7.5, 1.5 Hz, 1H), 7.46 (td,  $J$  = 7.5, 1.5 Hz, 1H), 7.36 (td,  $J$  = 7.5, 1.5 Hz, 1H), 7.16 (s, 1H), 6.93 (dd,  $J$  = 8.0, 1.5 Hz, 1H), 6.88 (td,  $J$  = 7.5, 1.5 Hz, 1H), 6.81 (td,  $J$  = 7.5, 1.5 Hz, 1H), 6.75 (dd,  $J$  = 7.5, 1.5 Hz, 1H), 6.67 (s, 1H), 6.37 (dt,  $J$  = 10.0, 2.0 Hz, 1H), 5.84 (dt,  $J$  = 9.5, 3.5 Hz, 1H), 4.81-4.80 (m, 3H), 4.40 (d,  $J$  = 11.0 Hz, 1H), 3.85 (d,  $J$  = 11.0 Hz, 1H).

<sup>13</sup>C NMR (125 MHz, CDCl<sub>3</sub>)  $\delta$  149.3, 146.1, 143.4, 131.9, 131.1, 130.8, 130.0, 128.6, 125.2, 124.5, 124.2, 123.6, 122.7, 122.0, 121.6, 120.3, 116.7, 116.2, 116.0, 109.7, 83.6, 67.8, 65.7.

**<sup>13</sup>C NMR** (DEPT135°, 125 MHz, CDCl<sub>3</sub>) δ 129.8 (CH), 128.5 (CH), 125.1 (CH), 124.3 (CH), 123.5 (CH), 122.5 (CH), 121.9 (CH), 120.1 (CH), 116.6 (CH), 116.0 (CH), 115.9 (CH), 109.6 (CH), 67.7 (CH<sub>2</sub>), 65.6 (CH<sub>2</sub>).

**IR (KBr)** ν(cm<sup>-1</sup>): 3356, 2920, 1501, 1423, 1269, 1184, 1053, 979, 941, 748 cm<sup>-1</sup>.

**HRMS** (ESI) calcd. for [C<sub>23</sub>H<sub>17</sub>NO<sub>3</sub>+H]<sup>+</sup> requires 356.12812, found 356.12747 [M+H]<sup>+</sup>.

7.659  
7.677  
7.512  
7.502  
7.495  
7.492  
7.477  
7.474  
7.462  
7.459  
7.447  
7.444  
7.379  
7.376  
7.364  
7.364  
7.348  
7.346  
7.256  
7.159  
6.938  
6.935  
6.922  
6.919  
6.896  
6.893  
6.881  
6.878  
6.866  
6.863  
6.824  
6.821  
6.809  
6.806  
6.794  
6.790  
6.752  
6.752  
6.740  
6.737  
6.686  
6.587  
6.585  
6.575  
6.567  
6.567  
6.564  
6.564  
6.560  
5.858  
5.851  
5.844  
5.839  
5.832  
5.824  
4.808  
4.804  
4.801  
4.797  
4.416  
4.394  
3.842

0.000

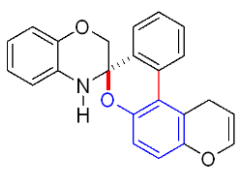

<sup>1</sup>H NMR, 500 MHz, CDCl<sub>3</sub>

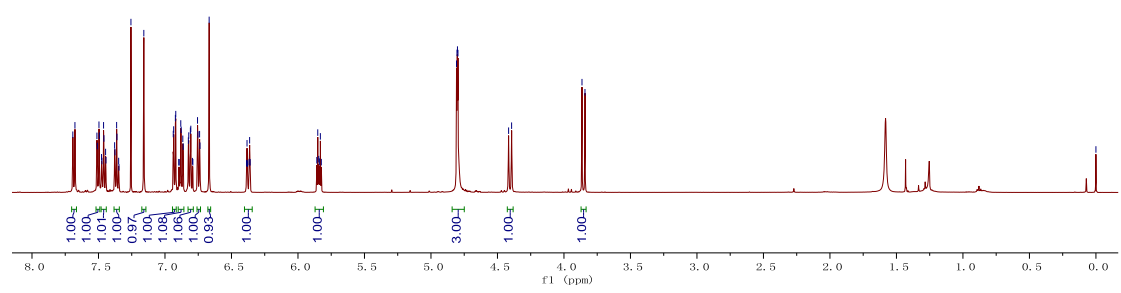

Zeh-132  
148.212  
148.172  
148.066  
131.895  
131.117  
130.755  
129.957  
128.618  
125.229  
124.459  
124.232  
123.584  
122.661  
122.021  
121.553  
120.260  
116.725  
116.159  
115.970  
109.739

83.629  
77.160  
67.794  
65.686

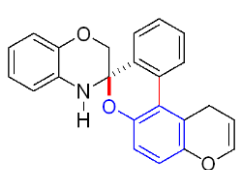

<sup>13</sup>C NMR, 125 MHz, CDCl<sub>3</sub>

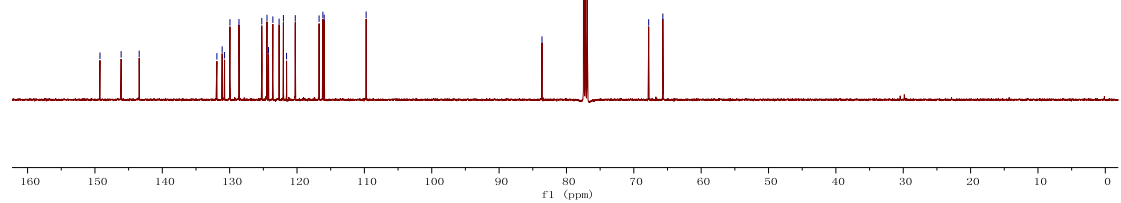

Zeh-132b.4.fid

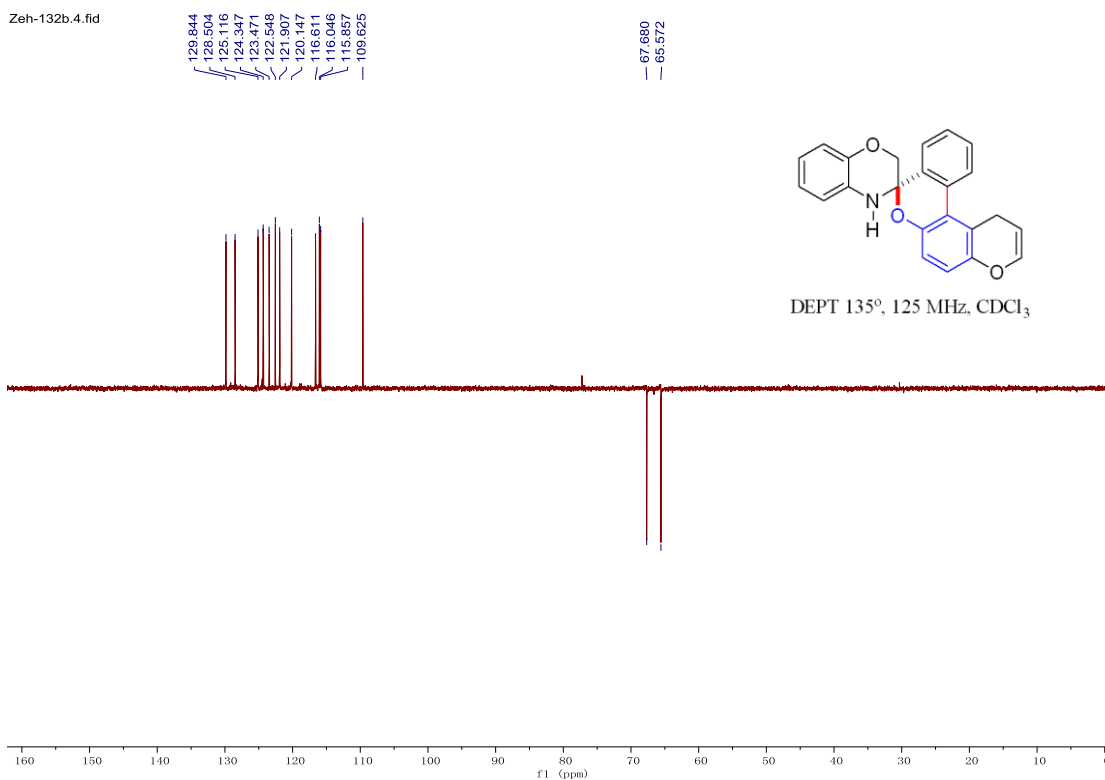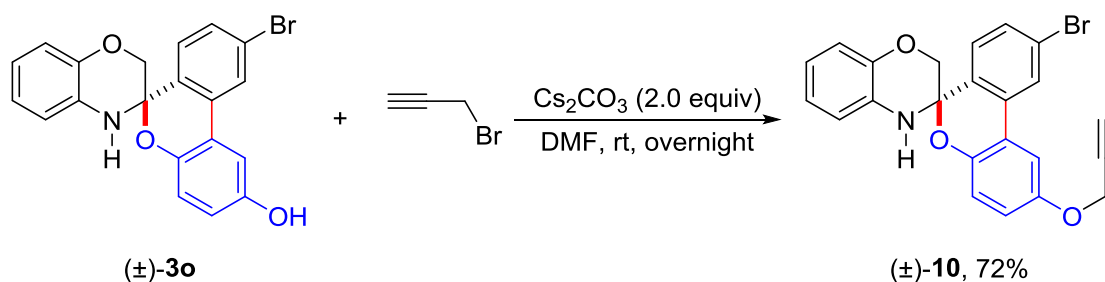

(±)-**3o** (395 mg, 1.0 mmol), Cs<sub>2</sub>CO<sub>3</sub> (652 mg, 2.0 mmol), and DMF (15 mL) were added to a 50 mL round bottom flask. 3-Bromopropyne (172 μL, 2.0 mmol) was added slowly to the reaction mixture. The reaction mixture was stirred at room temperature overnight. The mixture was concentrated in vacuum. The residue was purified by flash column chromatography (petroleum ether/EtOAc, 5/1) to afford (±)-**10** (310 mg, 72%).

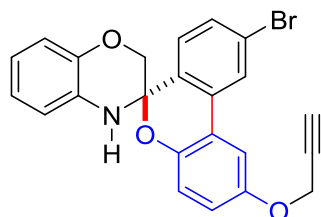

(±)-9'-bromo-2'-(prop-2-yn-1-yloxy)-2*H*,4*H*-spiro[benzo[*b*][1,4]oxazine-3,6'-benzo[*c*]chromene]

Compound **10**: A yellow solid. Column chromatography, eluent: Petroleum/EtOAc = 8/1,  $R_f = 0.6$ , 72% yield. m.p. 58-60 °C.

$^1\text{H NMR}$  (500 MHz,  $\text{CDCl}_3$ , TMS)  $\delta$  7.81 (d,  $J = 2.0$  Hz, 1H), 7.46 (dd,  $J = 8.5, 2.0$  Hz, 1H), 7.36 (d,  $J = 8.0$  Hz, 1H), 7.27 (d,  $J = 3.0$  Hz, 1H), 6.97 (d,  $J = 9.0$  Hz, 1H), 6.94-6.90 (m, 2H), 6.87 (td,  $J = 7.5, 1.5$  Hz, 1H), 6.81 (td,  $J = 7.5, 1.5$  Hz, 1H), 6.72 (dd,  $J = 7.5, 1.5$  Hz, 1H), 4.83 (d,  $J = 2.5$  Hz, 1H), 4.72 (d,  $J = 2.5$  Hz, 2H), 4.34 (dd,  $J = 11.5, 2.5$  Hz, 1H), 3.79 (d,  $J = 11.5$  Hz, 1H), 2.57 (t,  $J = 2.5$  Hz, 1H).

$^{13}\text{C NMR}$  (125 MHz,  $\text{CDCl}_3$ )  $\delta$  153.0, 146.6, 143.4, 132.8, 131.6, 130.9, 130.8, 127.3, 125.7, 124.4, 122.1, 120.8, 120.5, 119.6, 117.9, 116.7, 116.1, 109.8, 83.7, 78.7, 75.9, 67.5, 56.8.

**IR** (KBr)  $\nu(\text{cm}^{-1})$ : 3366, 2920, 1613, 1499, 1453, 1199, 1082, 949, 842, 740  $\text{cm}^{-1}$ .

**HRMS** (ESI) calcd. for  $[\text{C}_{23}\text{H}_{16}\text{BrNO}_3+\text{H}]^+$  requires 434.03863, found 434.03833  $[\text{M}+\text{H}]^+$ .

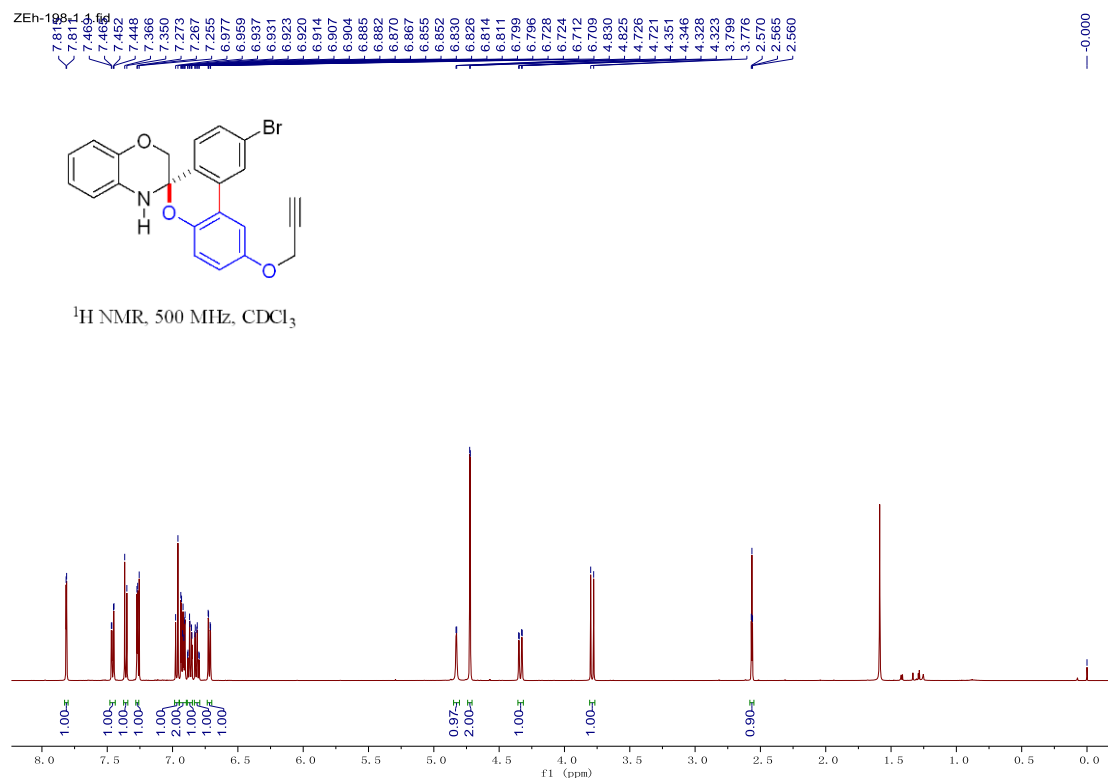

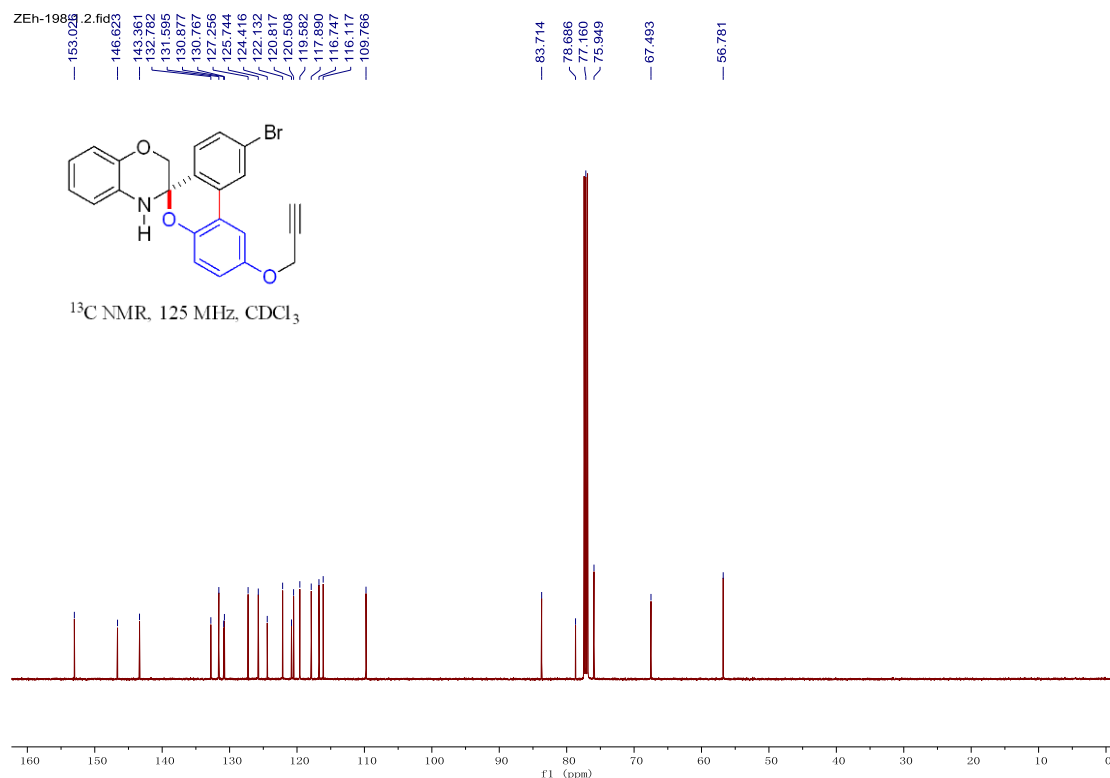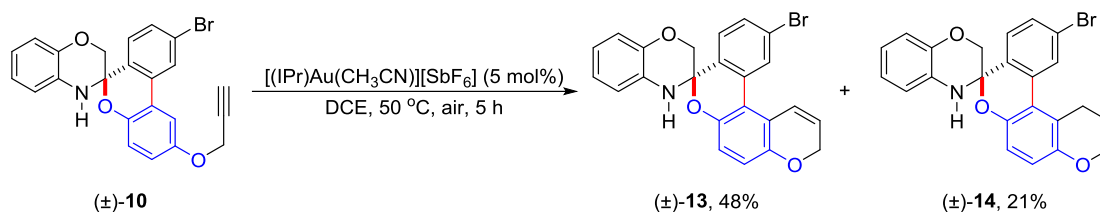

An oven dried reaction tube, fitted with a magnetic stirrer, was charged with  $[(\text{IPr})\text{Au}(\text{CH}_3\text{CN})][\text{SbF}_6]$  (4.3 mg, 5 mol%), substrate  $(\pm)$ -**10** (43.3 mg, 0.1 mmol). DCE (1 mL) was added by syringe. The tube was sealed and the reaction was at  $50^\circ\text{C}$  for 5 h. The mixture was cooled to room temperature and concentrated in vacuum. The residue was purified by flash column chromatography (petroleum ether/THF, 150/1) to afford  $(\pm)$ -**13** (20.6 mg, 48%) and  $(\pm)$ -**14** (9.1 mg, 21%).

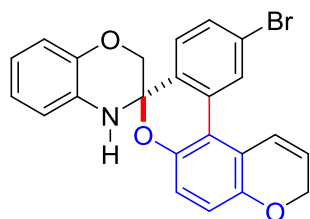

(±)-11'-bromo-2*H*,3'*H*,4*H*-spiro[benzo[*b*][1,4]oxazine-3,8'-benzo[*c*]pyrano[3,2-*f*]chromene]

Compound **13**: A white solid. Column chromatography, eluent: Petroleum/THF = 150/1,  $R_f = 0.1$ , 48% yield. m.p. 123-125 °C.

$^1\text{H NMR}$  (500 MHz,  $\text{CDCl}_3$ , TMS)  $\delta$  7.73 (d,  $J = 2.0$  Hz, 1H), 7.46 (dd,  $J = 8.5, 2.0$  Hz, 1H), 7.41 (d,  $J = 8.5$  Hz, 1H), 6.92-6.79 (m, 6H), 6.70 (dd,  $J = 7.5, 1.5$  Hz, 1H), 6.06-6.02 (m, 1H), 4.82 (d,  $J = 2.5$  Hz, 1H), 4.77 (dd,  $J = 14.0, 5.0$  Hz, 1H), 4.68-4.64 (m, 1H), 4.40 (dd,  $J = 11.5, 2.5$  Hz, 1H), 3.87 (d,  $J = 11.5$  Hz, 1H).

$^{13}\text{C NMR}$  (125 MHz,  $\text{CDCl}_3$ )  $\delta$  150.6, 146.9, 143.5, 132.8, 132.1, 131.1, 130.7, 130.4, 126.5, 123.9, 123.6, 122.12, 122.08, 120.6, 119.13, 119.07, 118.3, 118.2, 116.8, 116.2, 83.4, 66.4, 64.0.

**IR (KBr)**  $\nu(\text{cm}^{-1})$ : 2917, 1660, 1461, 1397, 1311, 1214, 1043, 997, 829, 736  $\text{cm}^{-1}$ .

**HRMS (ESI)** calcd. for  $[\text{C}_{23}\text{H}_{16}\text{BrNO}_3+\text{H}]^+$  requires 434.03863, found 434.03833  $[\text{M}+\text{H}]^+$ .

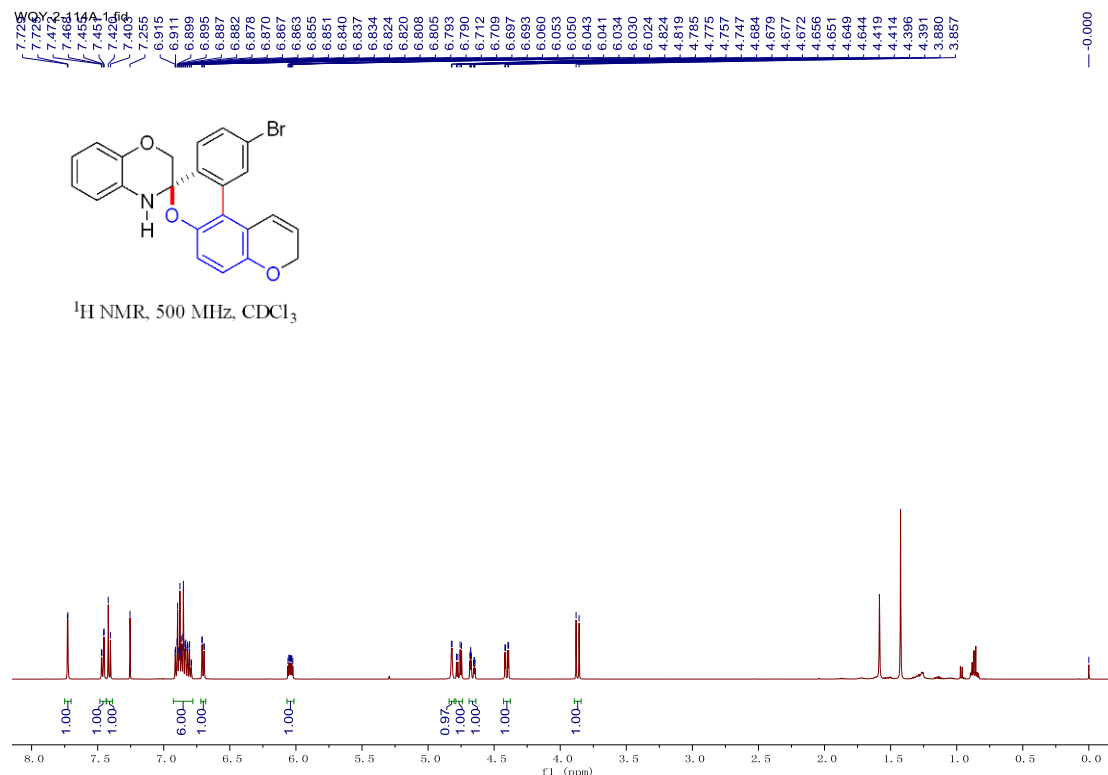

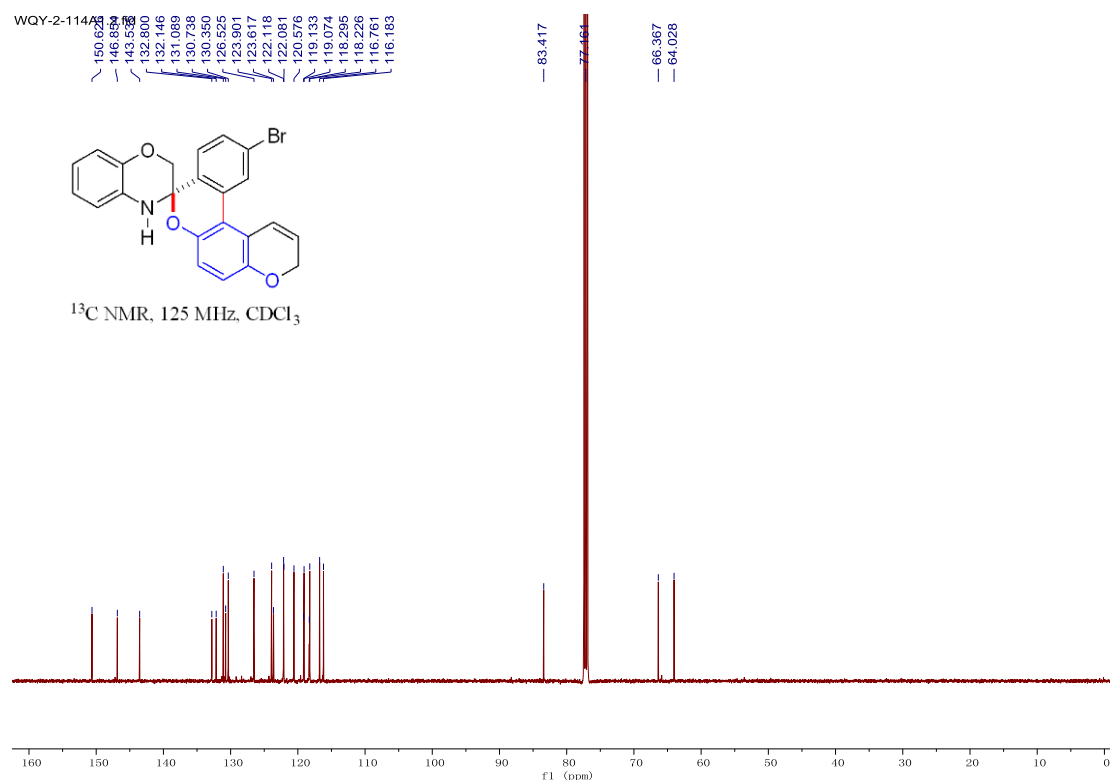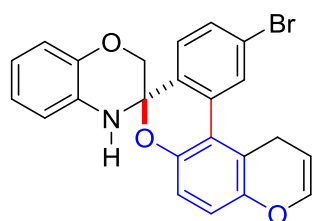

(±)-11'-bromo-1'H,2H,4H-spiro[benzo[*b*][1,4]oxazine-3,8'-benzo[*c*]pyrano[3,2-*f*]chromene]

Compound **14**: A white solid. Column chromatography, eluent: Petroleum/THF = 150/1,  $R_f$  = 0.1, 21% yield. m.p. 120-122 °C.

<sup>1</sup>H NMR (500 MHz, CDCl<sub>3</sub>, TMS)  $\delta$  7.77 (t,  $J$  = 1.5 Hz, 1H), 7.44 (dt,  $J$  = 8.5, 1.5 Hz, 1H), 7.34 (dd,  $J$  = 8.0, 1.5 Hz, 1H), 7.07 (s, 1H), 6.91 (dd,  $J$  = 7.5, 1.5 Hz, 1H), 6.87 (td,  $J$  = 7.5, 1.5 Hz, 1H), 6.81 (td,  $J$  = 7.5, 1.5 Hz, 1H), 6.72 (dt,  $J$  = 7.5, 1.5 Hz, 1H), 6.65 (s, 1H), 6.36 (dt,  $J$  = 10.0, 2.0 Hz, 1H), 5.86 (dt,  $J$  = 10.0, 3.5 Hz, 1H), 4.81-4.80 (m, 3H), 4.36 (dd,  $J$  = 11.5, 2.5 Hz, 1H), 3.78 (d,  $J$  = 11.5 Hz, 1H).

<sup>13</sup>C NMR (125 MHz, CDCl<sub>3</sub>)  $\delta$  149.4, 146.3, 143.4, 132.8, 131.3, 130.8, 130.6, 127.1, 125.7, 124.9, 124.4, 124.3, 124.2, 122.1, 120.5, 120.2, 116.7, 116.2, 116.1, 109.8, 83.6, 67.5, 65.7.



IR (KBr)  $\nu$  (cm<sup>-1</sup>): 2920, 1610, 1501, 1426, 1404, 1310, 1210, 1045, 940, 744 cm<sup>-1</sup>.

HRMS (ESI) calcd. for [C<sub>23</sub>H<sub>16</sub>BrNO<sub>3</sub>+H]<sup>+</sup> requires 434.03863, found 434.03671

[M+H]<sup>+</sup>.

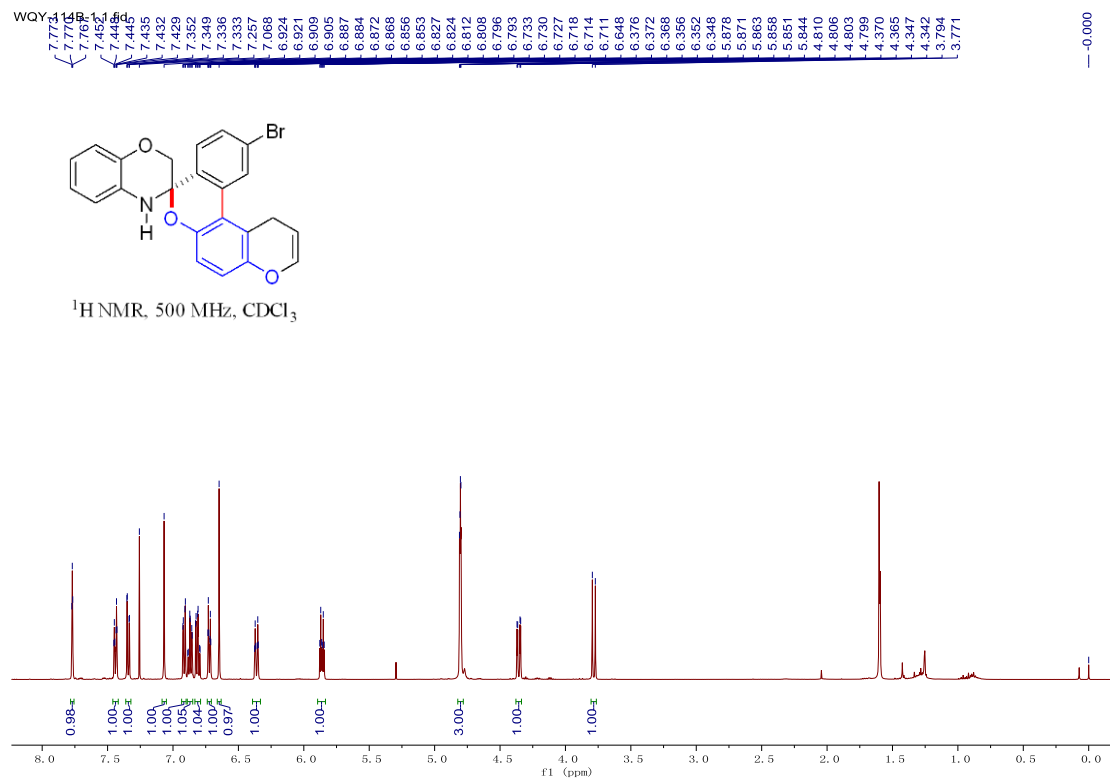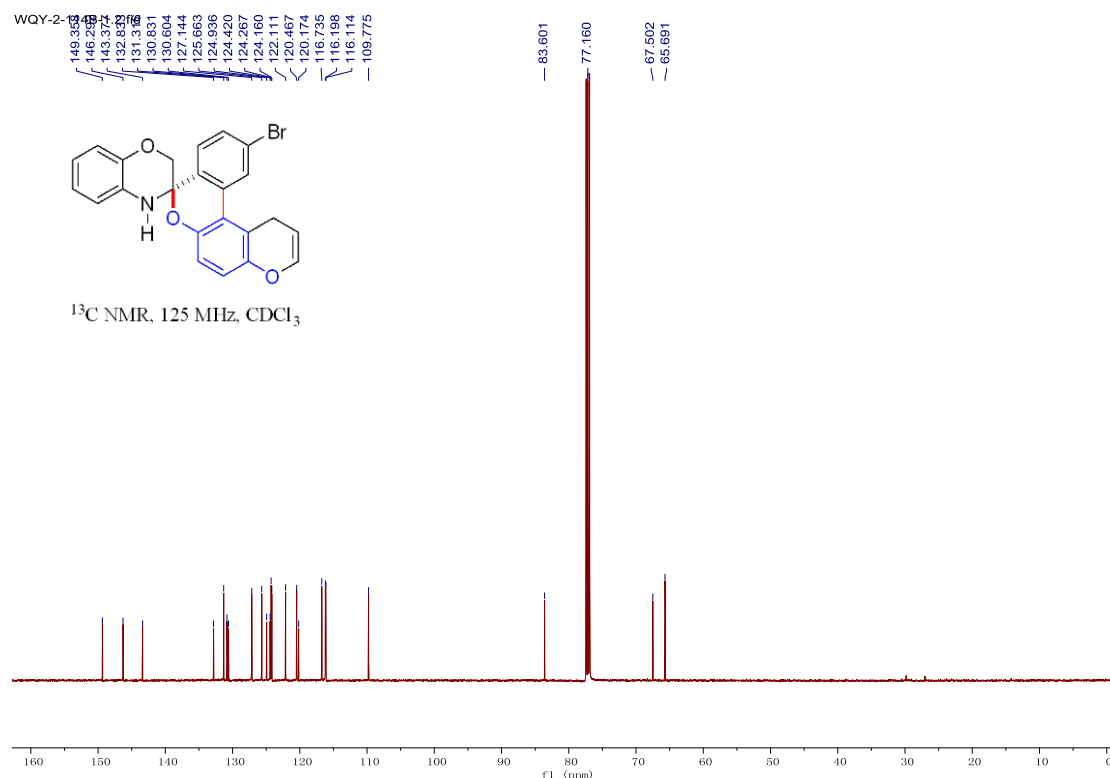

## (F) Gram Scale Experiments

An oven dried reaction tube, fitted with a magnetic stirrer, was charged with  $\text{Zn}(\text{OAc})_2$  (0.875 g, 4.8 mmol),  $[\text{Cp}^*\text{RhCl}_2]_2$  (29.6 mg, 1 mol %), substrate **1a** (1.0 g, 4.8 mmol), **2a** (1.033 g, 9.57 mmol). The tube was fitted with a rubber septum and acetone (47 mL) was added by syringe. Then the tube was sealed and the reaction was at 50 °C for 24 h under air. Afterwards, the mixture was cooled to room temperature and concentrated in vacuum. The residue was purified by flash column chromatography (petroleum ether/EtOAc, 4/1) to afford ( $\pm$ )-**3a** (991 mg, 65% yield).

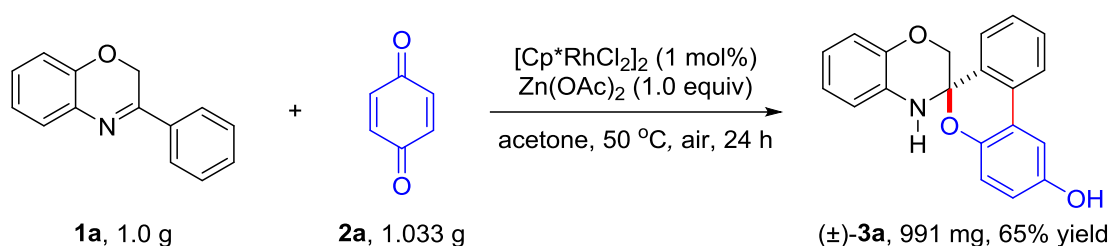

## (G) Mechanistic Experiments

### a) H/D exchange

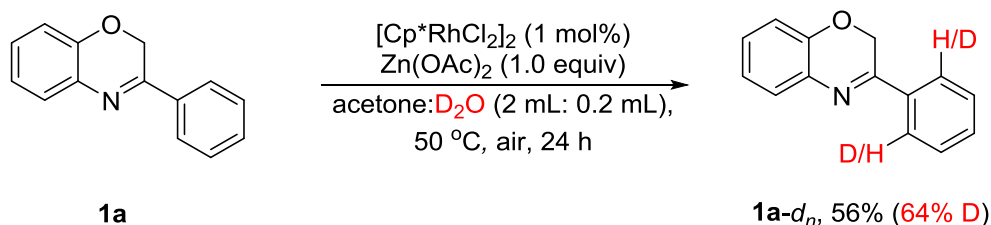

An oven dried 15 mL schlenk tube was charged with **1a** (41.8 mg, 0.2 mmol),  $\text{Zn}(\text{OAc})_2$  (36.6 mg, 0.2 mmol), and catalyst  $[\text{Cp}^*\text{RhCl}_2]_2$  (1.2 mg, 1 mol %). The tube was added acetone (2.0 mL) and  $\text{D}_2\text{O}$  (0.2 mL) at 50 °C for 24 h under air. Afterwards, the reaction mixture was filtered through a short pad of celite, the solvent was removed under reduced pressure and the crude reaction mixture was directly purified through column chromatography on silica gel using petroleum ether/ ethylacetate (8:1) as eluent to recover the starting material (56%). The deuterium incorporation (64%) was determined by  $^1\text{H}$  NMR spectroscopy.

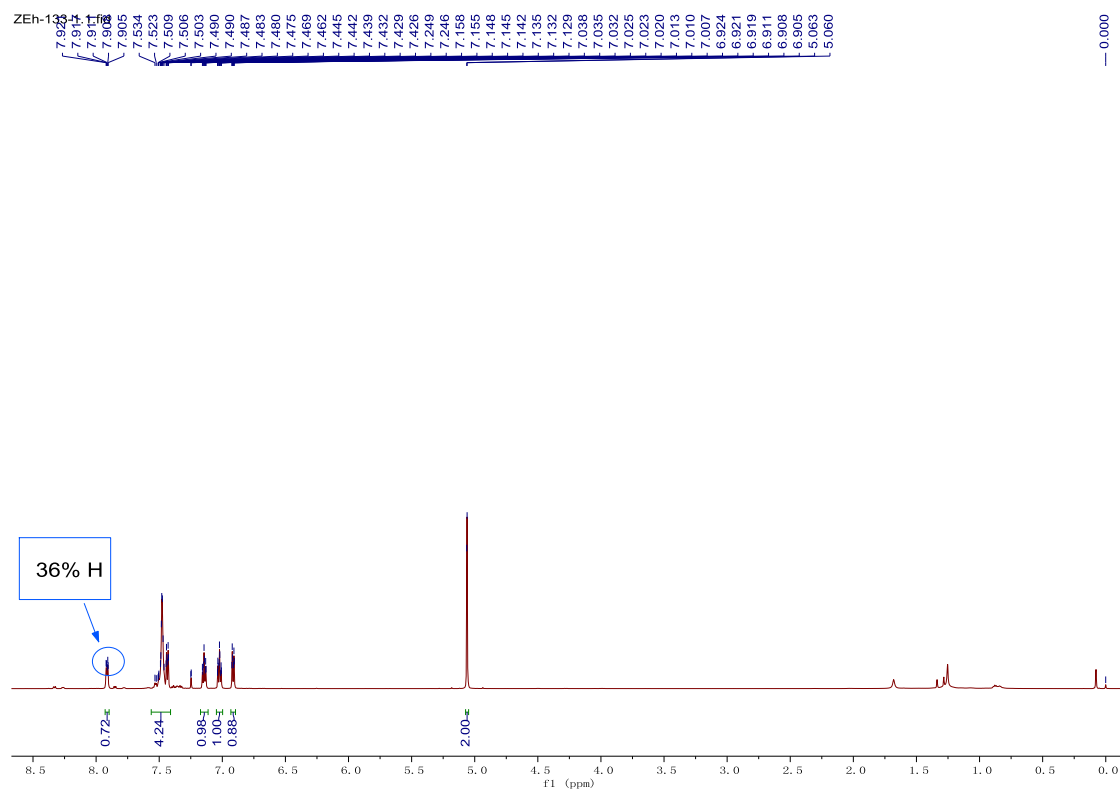

## b) KIE Experiments

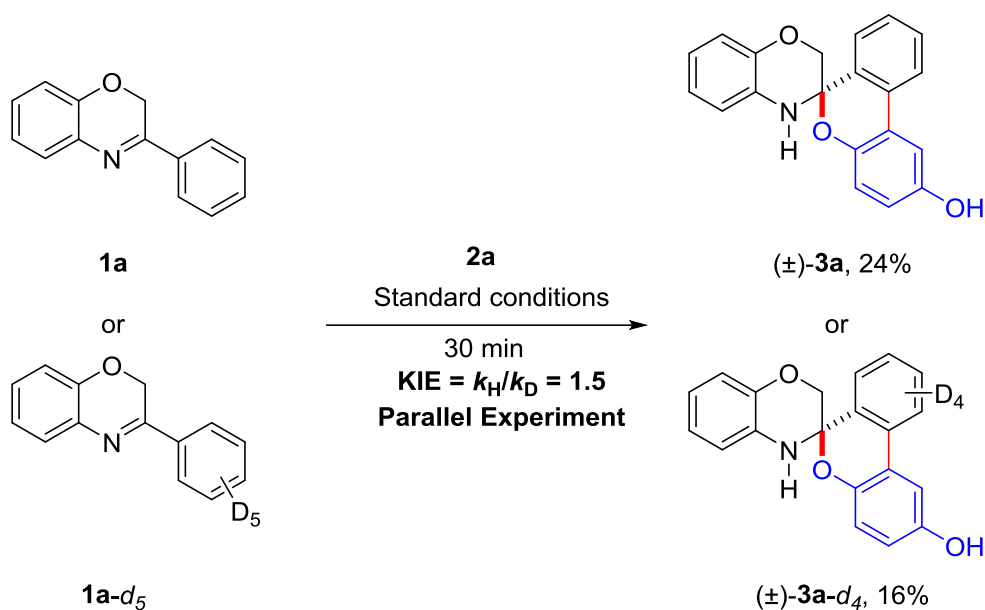

To an oven dried reaction flask were added imines **1a** (20.9 mg, 0.1 mmol), **2a** (21.7 mg, 0.2 mmol),  $[Cp^*RhCl_2]_2$  (0.6 mg, 1 mol%),  $Zn(OAc)_2$  (18.3 mg, 0.1 mmol) with a stir bar. Acetone (1.0 mL) was added and the mixture was stirred at 50 °C for 30 min under air. Afterwards, it was evaporated under reduced pressure and the in-situ yield (24%, 30 min) of product **3a** was determined by  $^1H$  NMR analysis by using  $CH_2Br_2$  as

an internal standard.

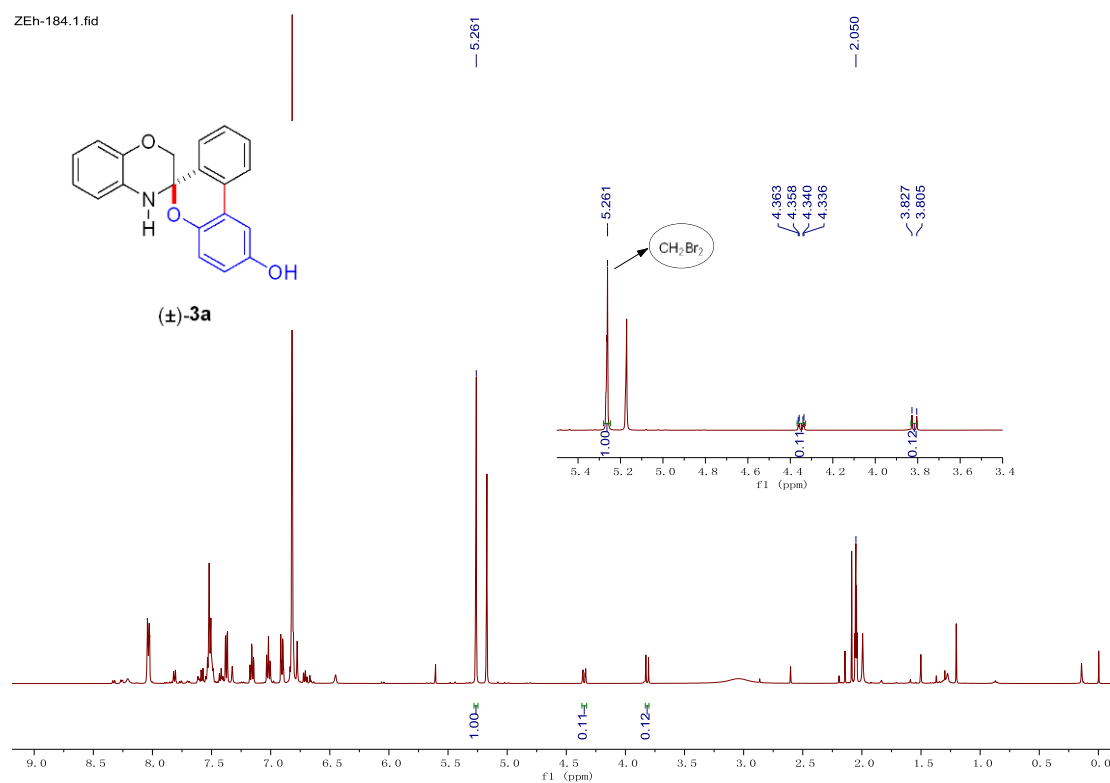

To an oven dried reaction flask were added imines **1a-d<sub>5</sub>** (21.4 mg, 0.1 mmol), **2a** (21.7 mg, 0.2 mmol), [Cp\**Rh*Cl<sub>2</sub>]<sub>2</sub> (0.6 mg, 1 mol%), Zn(OAc)<sub>2</sub> (18.3 mg, 0.1 mmol) with a stir bar. Acetone (1.0 mL) was added and the mixture was stirred at 50 °C for 30 min under air. Afterwards, it was evaporated under reduced pressure and the in-situ yield (16%, 30 min) of product **3a-d<sub>4</sub>** was determined by <sup>1</sup>H NMR analysis by using CH<sub>2</sub>Br<sub>2</sub> as an internal standard.

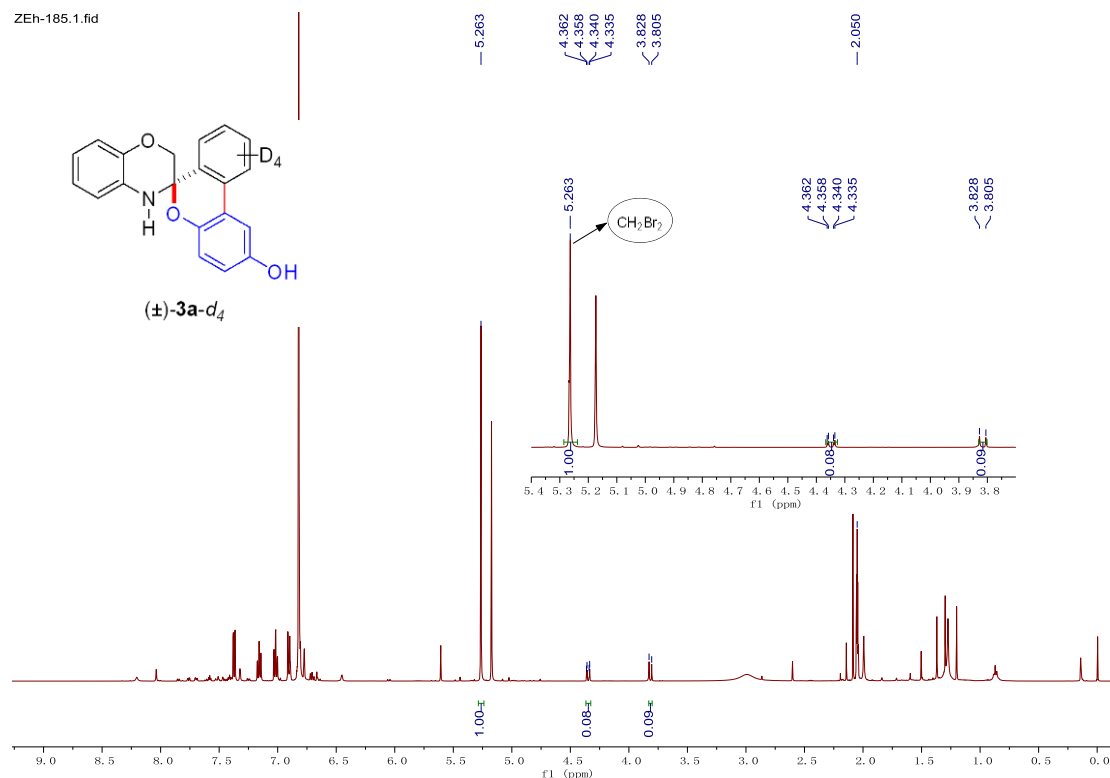

### c) Preparation of the rhodacyclic complex **15**<sup>[3]</sup>

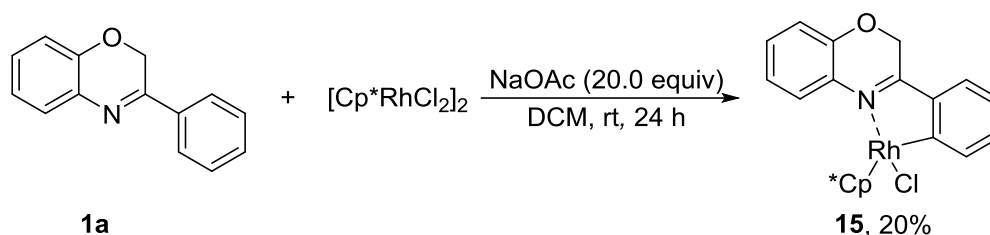

Benzoxazines **1a** (21.9 mg, 0.105 mmol),  $[\text{Cp}^*\text{RhCl}_2]_2$  (30.9 mg, 0.05 mmol) and NaOAc (82.03 mg, 1.0 mmol) were weighted into a Schlenk tube equipped with a stir bar. DCM (2.5 mL) was added, and the mixture was stirred at room temperature for 24 h under air. Afterwards, followed by filtration of any precipitate. The solvent was then removed and the brown product was purified by recrystallization using dichloromethane and diethyl ether to give product complex **15** (4.8 mg, 20% yield).

Compound **15**<sup>[3]</sup>: a yellow solid. Column chromatography, eluent: Petroleum/EtOAc = 1/1,  $R_f = 0.6$ , 4.8 mg, 20% yield.

<sup>1</sup>H NMR (500 MHz, CDCl<sub>3</sub>, TMS)  $\delta$  7.99 (dd,  $J = 7.5, 1.5$  Hz, 1H), 7.92 (d,  $J = 7.5$  Hz, 1H), 7.34 (dd,  $J = 7.5, 1.5$  Hz, 1H), 7.29 (dd,  $J = 7.5, 1.5$  Hz, 1H), 7.19 (td,  $J = 7.5, 1.5$

Hz, 1H), 7.10 (td,  $J = 7.5, 1.5$  Hz, 1H), 7.06 (td,  $J = 7.5, 1.5$  Hz, 1H), 6.98 (dd,  $J = 8.0, 1.5$  Hz, 1H), 5.43 (d,  $J = 15.0$  Hz, 1H), 4.82 (d,  $J = 15.5$  Hz, 1H), 1.53 (s, 15H).

$^{13}\text{C}$  NMR (125 MHz,  $\text{CDCl}_3$ )  $\delta$  188.1 (d,  $J = 32.3$  Hz), 172.8, 148.3, 143.7, 137.4, 133.5, 131.9, 128.6, 126.4, 126.3, 123.2, 122.8, 116.0, 96.7 (d,  $J = 6.3$  Hz), 64.4, 9.5.

IR (KBr)  $\nu(\text{cm}^{-1})$ : 3366, 2920, 1613, 1499, 1453, 1199, 1082, 949, 842 740  $\text{cm}^{-1}$ .

HRMS (ESI) calcd. for  $[\text{C}_{24}\text{H}_{25}\text{NORhCl}+\text{Na}]^+$  requires 504.05719, found 504.05753  $[\text{M}+\text{Na}]^+$ .

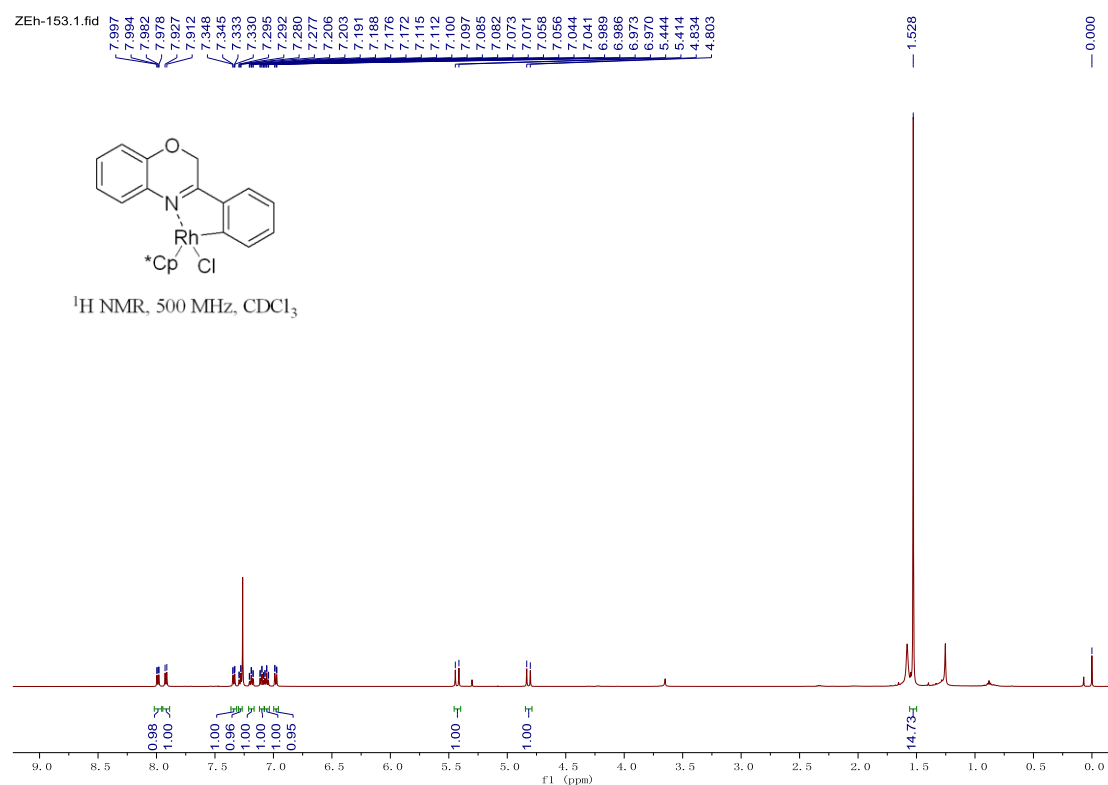

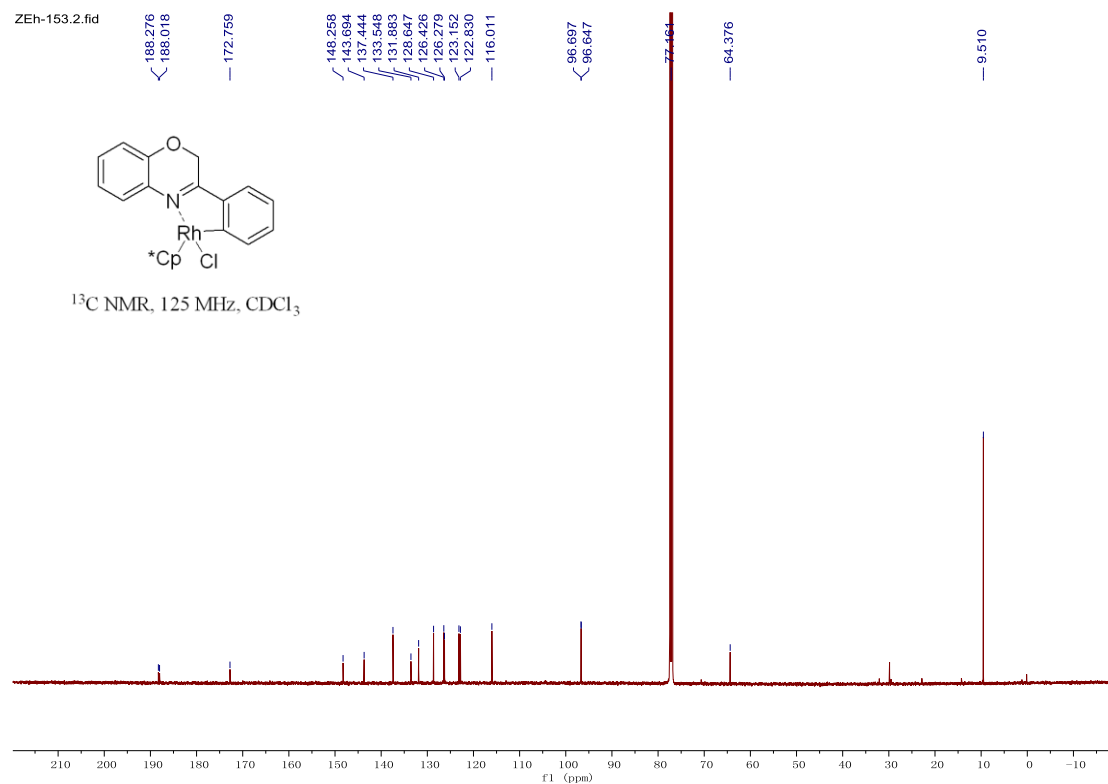

#### d) Stoichiometric reaction between complex **15** and **2a**

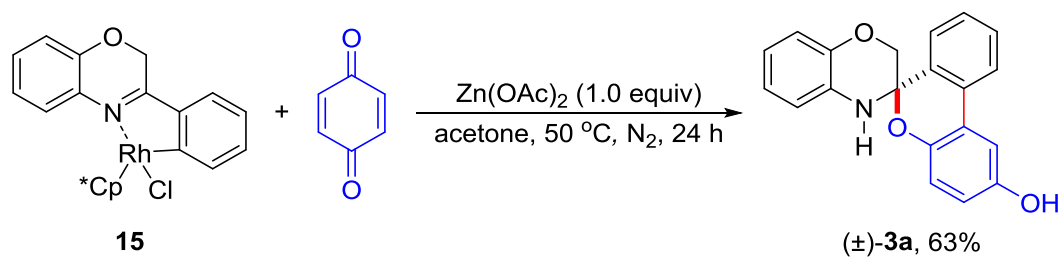

Complex **15** (7 mg, 0.015 mmol), **2a** (3 mg, 0.03 mmol), Zn(OAc)<sub>2</sub> (3 mg, 0.015 mmol) were weighted into a Schlenk tube equipped with a stir bar. Acetone (1.0 mL) was added, and the mixture was stirred at 50 °C for 24 h under N<sub>2</sub>. The mixture was cooled to room temperature and concentrated in vacuum. The residue was purified by flash column chromatography (petroleum ether/EtOAc, 5/1) to afford **3a** (3.0 mg, 63%).

## (H) X-ray Crystal Data of Compound **3i**.

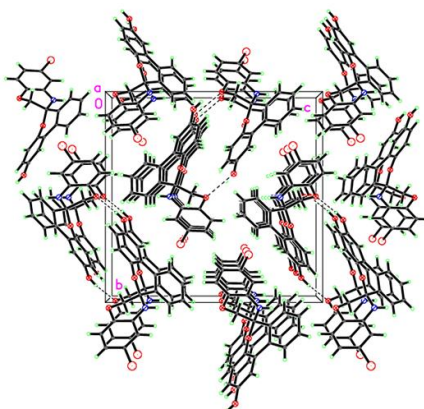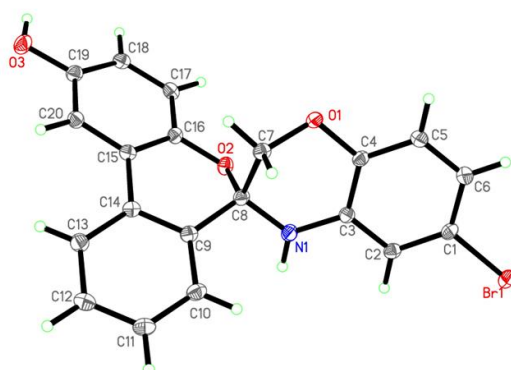

The crystal data of **3i** have been deposited in CCDC with number 2261847.

**Table S8. Crystal data and structure refinement for 221220e\_0m.**

|                      |                      |                |
|----------------------|----------------------|----------------|
| Identification code  | 221220e_0m           |                |
| Empirical formula    | $C_{20}H_{14}BrNO_3$ |                |
| Formula weight       | 396.23               |                |
| Temperature          | 100.0 K              |                |
| Wavelength           | 1.34139 Å            |                |
| Crystal system       | Orthorhombic         |                |
| Space group          | P212121              |                |
| Unit cell dimensions | $a = 6.1673(15)$ Å   | $a = 90^\circ$ |
|                      | $b = 15.976(4)$ Å    | $b = 90^\circ$ |



|                                        |                                                            |                |
|----------------------------------------|------------------------------------------------------------|----------------|
|                                        | $c = 16.479(4) \text{ \AA}$                                | $g = 90^\circ$ |
| Volume                                 | $1623.6(7) \text{ \AA}^3$                                  |                |
| Z                                      | 4                                                          |                |
| Density (calculated)                   | $1.621 \text{ Mg/m}^3$                                     |                |
| Absorption coefficient                 | $2.385 \text{ mm}^{-1}$                                    |                |
| F(000)                                 | 800                                                        |                |
| Crystal size                           | $0.12 \times 0.1 \times 0.1 \text{ mm}^3$                  |                |
| Theta range for data collection        | $3.352 \text{ to } 70.461^\circ$                           |                |
| Index ranges                           | $-8 \leq h \leq 8, -22 \leq k \leq 21, -23 \leq l \leq 22$ |                |
| Reflections collected                  | 24321                                                      |                |
| Independent reflections                | 4582 [R(int) = 0.0675]                                     |                |
| Completeness to theta = $53.594^\circ$ | 98.5 %                                                     |                |
| Absorption correction                  | Semi-empirical from equivalents                            |                |
| Max. and min. transmission             | 0.7534 and 0.5418                                          |                |
| Refinement method                      | Full-matrix least-squares on $F^2$                         |                |
| Data / restraints / parameters         | 4582 / 0 / 227                                             |                |
| Goodness-of-fit on $F^2$               | 1.090                                                      |                |
| Final R indices [ $I > 2\sigma(I)$ ]   | $R1 = 0.0403, wR2 = 0.0978$                                |                |
| R indices (all data)                   | $R1 = 0.0416, wR2 = 0.0988$                                |                |
| Absolute structure parameter           | -0.013(11)                                                 |                |
| Extinction coefficient                 | n/a                                                        |                |
| Largest diff. peak and hole            | $0.543 \text{ and } -0.879 \text{ e.\AA}^{-3}$             |                |

### (I) X-ray Crystal Data of Compound 13.

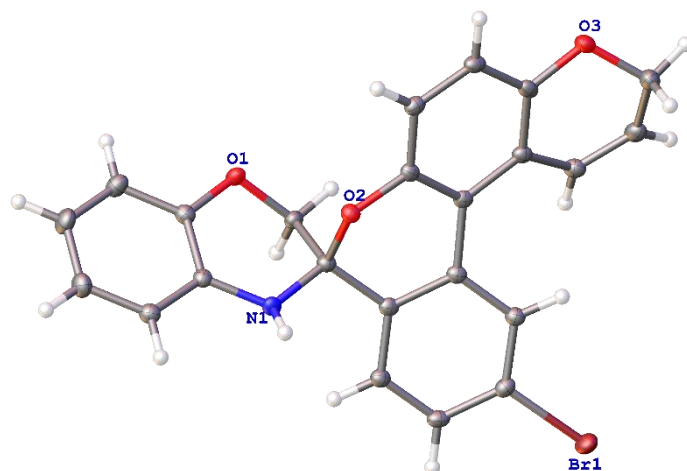

The crystal data of **13** have been deposited in CCDC with number 2283919.

**Table S9. Crystal data and structure refinement for 124311.**

|                                       |                                                   |
|---------------------------------------|---------------------------------------------------|
| Identification code                   | 124311                                            |
| Empirical formula                     | C <sub>23</sub> H <sub>16</sub> BrNO <sub>3</sub> |
| Formula weight                        | 434.28                                            |
| Temperature/K                         | 99.97(14)                                         |
| Crystal system                        | monoclinic                                        |
| Space group                           | P2 <sub>1</sub> /c                                |
| a/Å                                   | 14.11122(19)                                      |
| b/Å                                   | 11.90270(16)                                      |
| c/Å                                   | 26.9246(4)                                        |
| $\alpha$ /°                           | 90                                                |
| $\beta$ /°                            | 105.0778(14)                                      |
| $\gamma$ /°                           | 90                                                |
| Volume/Å <sup>3</sup>                 | 4366.61(10)                                       |
| Z                                     | 8                                                 |
| $\rho_{\text{calc}}$ /cm <sup>3</sup> | 1.321                                             |
| $\mu$ /mm <sup>-1</sup>               | 2.741                                             |
| F(000)                                | 1760.0                                            |
| Crystal size/mm <sup>3</sup>          | 0.14 × 0.12 × 0.08                                |
| Radiation                             | Cu K $\alpha$ ( $\lambda$ = 1.54184)              |

|                                                  |                                                                   |
|--------------------------------------------------|-------------------------------------------------------------------|
| 2 $\Theta$ range for data collection/ $^{\circ}$ | 6.488 to 133.202                                                  |
| Index ranges                                     | $-16 \leq h \leq 15$ , $-7 \leq k \leq 14$ , $-31 \leq l \leq 32$ |
| Reflections collected                            | 22661                                                             |
| Independent reflections                          | 7498 [ $R_{\text{int}} = 0.0284$ , $R_{\text{sigma}} = 0.0326$ ]  |
| Data/restraints/parameters                       | 7498/0/509                                                        |
| Goodness-of-fit on $F^2$                         | 1.050                                                             |
| Final R indexes [ $I \geq 2\sigma(I)$ ]          | $R_1 = 0.0364$ , $wR_2 = 0.0900$                                  |
| Final R indexes [all data]                       | $R_1 = 0.0420$ , $wR_2 = 0.0922$                                  |
| Largest diff. peak/hole / $e \text{ \AA}^{-3}$   | 0.94/-0.82                                                        |

## (J) References.

- [1] (a) Y. Shi, Y. Fang, X. Zhao, C. Zhu, X. Wu, X. Yang and Y. Luo, *Org. Lett.*, 2020, **22**, 4903–4907. (b) J. Zhang, J. Wei, W.-Y. Ding, S. Li, S.-H. Xiang and B. Tan, *J. Am. Chem. Soc.*, 2021, **143**, 6382–6387. (c) S. Wei, X. Feng and H. Du, *Org. Biomol. Chem.*, 2016, **14**, 8026–8029. (d) X.-W. Liu, C. Wang, Y. Yan, Y.-Q. Wang and J. Sun, *J. Org. Chem.*, 2013, **78**, 6276–6280. (e) L.-L. Wu, Y. Xiang, D.-C. Yang, Z. Guan and Y.-H. He, *Catal. Sci. Technol.*, 2016, **6**, 3963–3970. (f) J. Qin, F. Chen, Y.-M. He and Q.-H. Fan, *Org. Chem. Front.*, 2014, **1**, 952–955. (g) W. Sarkar, K. Naskar, S. Roy, I. Mondal, S. Karmakar, A. Mishra and I. Deb, *J. Org. Chem.*, 2022, **87**, 9988–10002.
- [2] (a) T. Varlet, C. Gelis, P. Retailleau, G. Bernadat, L. Neuville and G. Masson, *Angew. Chem., Int. Ed.*, 2020, **59**, 8491–8496. (b) N. Kaur, P. Kumar, A. Hazra and P. Banerjee, *Org. Lett.*, 2022, **24**, 8249–8254.
- [3] (a) Y. Shi, Y. Fang, X. Zhao, C. Zhu, X. Wu, X. Yang and Y. Luo, *Org. Lett.*, 2020, **22**, 4903–4907. (b) J.-J. Zhang, M. Zhang, M. Lu, Y. He, S. Li, L. Fan, X. Zhang, J.-K. Wu and X. Yang, *Chem. Commun.*, 2022, **58**, 5144–5147.
